# Supplementary material for: Disulfated Ophiuroid Type Steroids from the Far Eastern Starfish Pteraster marsippus and Their Cytotoxic Activity on the Models of 2D and 3D Cultures
Source: MDPI journal article supplement (doi:10.3390/md20030164), 2022-02-24

## Supplementary Materials

# Disulfated Ophiuroid Type Steroids from the Far Eastern Starfish *Pteraster marsippus* and their Cytotoxic Activity on the Models of 2D and 3D Cultures

Alla A. Kicha<sup>1\*</sup>, Anatoly I. Kalinovsky<sup>1</sup>, Timofey V. Malyarenko<sup>1</sup>, Olesya S. Malyarenko<sup>1</sup>, Svetlana P. Ermakova<sup>1</sup>, Roman S. Popov<sup>1</sup>, Valentin A. Stonik<sup>1</sup> and Natalia V. Ivanchina<sup>1</sup>

<sup>1</sup> G.B. Elyakov Pacific Institute of Bioorganic Chemistry, Far Eastern Branch of the Russian Academy of Sciences, Pr. 100-let Vladivostoku 159, 690022 Vladivostok, Russia; kaaniw@piboc.dvo.ru (A.I.K.); malyarenko-tv@mail.ru (T.V.M.); malyarenko.os@gmail.com (O.S.M.); svetlana\_ermakova@hotmail.com (S.P.E.); prs\_90@mail.ru (R.S.P.); stonik@piboc.dvo.ru (V.A.S.); ivanchina@piboc.dvo.ru (N.V.I.)

\* Correspondence: kicha@piboc.dvo.ru (A.A.K.); Tel.: +7-423-2312-360; Fax: +7-423-2314-050.

## List

|                                                                                                                                                                                            | Page |
|--------------------------------------------------------------------------------------------------------------------------------------------------------------------------------------------|------|
| <b>Figure S1.</b> HRESIMS spectra of compound <b>1</b>                                                                                                                                     | 4    |
| <b>Figure S2.</b> $^1\text{H}$ NMR (700.13 MHz, $\text{CD}_3\text{OD}$ ) spectrum of compound <b>1</b>                                                                                     | 5    |
| <b>Figure S3.</b> $^{13}\text{C}$ NMR (176.04 MHz, $\text{CD}_3\text{OD}$ ) spectrum of compound <b>1</b>                                                                                  | 6    |
| <b>Figure S4.</b> COSY (700.13 MHz, $\text{CD}_3\text{OD}$ ) spectrum of compound <b>1</b>                                                                                                 | 7    |
| <b>Figure S5.</b> HSQC (700.13 MHz, $\text{CD}_3\text{OD}$ ) spectrum of compound <b>1</b>                                                                                                 | 8    |
| <b>Figure S6.</b> HMBC (700.13 MHz, $\text{CD}_3\text{OD}$ ) spectrum of compound <b>1</b>                                                                                                 | 9    |
| <b>Figure S7.</b> ROESY (700.13 MHz, $\text{CD}_3\text{OD}$ ) spectrum of compound <b>1</b>                                                                                                | 10   |
| <b>Figure S8.</b> $^1\text{H}$ NMR (700.13 MHz, $\text{CD}_3\text{OD}$ ) spectrum of the mixture of <b>2</b> and <b>3</b>                                                                  | 11   |
| <b>Figure S9.</b> $^{13}\text{C}$ NMR (176.04 MHz, $\text{CD}_3\text{OD}$ ) spectrum of the mixture of <b>2</b> and <b>3</b>                                                               | 12   |
| <b>Figure S10.</b> COSY (700.13 MHz, $\text{CD}_3\text{OD}$ ) spectrum of the mixture of <b>2</b> and <b>3</b>                                                                             | 13   |
| <b>Figure S11.</b> HSQC (700.13 MHz, $\text{CD}_3\text{OD}$ ) spectrum of the mixture of <b>2</b> and <b>3</b>                                                                             | 14   |
| <b>Figure S12.</b> HMBC (700.13 MHz, $\text{CD}_3\text{OD}$ ) spectrum of the mixture of <b>2</b> and <b>3</b>                                                                             | 15   |
| <b>Figure S13.</b> ROESY (700.13 MHz, $\text{CD}_3\text{OD}$ ) spectrum of the mixture of <b>2</b> and <b>3</b>                                                                            | 16   |
| <b>Figure S14.</b> HRESIMS spectra of the mixture of <b>2</b> and <b>3</b>                                                                                                                 | 17   |
| <b>Figure S15.</b> HRESIMS spectra of compound <b>2a</b>                                                                                                                                   | 18   |
| <b>Figure S16.</b> HRESIMS spectra of compound <b>3a</b>                                                                                                                                   | 19   |
| <b>Figure S17.</b> (A) COSY and key HMBC correlations of the mixture of compounds <b>2a</b> and <b>3a</b> . (B) Key ROESY correlations of the mixture of compounds <b>2a</b> and <b>3a</b> | 20   |
| <b>Figure S18.</b> $^1\text{H}$ NMR (700.13 MHz, $\text{CD}_3\text{OD}$ ) spectrum of compound <b>2a</b>                                                                                   | 21   |
| <b>Figure S19.</b> $^{13}\text{C}$ NMR (176.04 MHz, $\text{CD}_3\text{OD}$ ) spectrum of compound <b>2a</b>                                                                                | 22   |
| <b>Figure S20.</b> COSY (700.13 MHz, $\text{CD}_3\text{OD}$ ) spectrum of compound <b>2a</b>                                                                                               | 23   |
| <b>Figure S21.</b> HSQC (700.13 MHz, $\text{CD}_3\text{OD}$ ) spectrum of compound <b>2a</b>                                                                                               | 24   |
| <b>Figure S22.</b> HMBC (700.13 MHz, $\text{CD}_3\text{OD}$ ) spectrum of compound <b>2a</b>                                                                                               | 25   |
| <b>Figure S23.</b> ROESY (700.13 MHz, $\text{CD}_3\text{OD}$ ) spectrum of compound <b>2a</b>                                                                                              | 26   |
| <b>Figure S24.</b> $^1\text{H}$ NMR (700.13 MHz, $\text{CD}_3\text{OD}$ ) spectrum of compound <b>3a</b>                                                                                   | 27   |
| <b>Figure S25.</b> $^{13}\text{C}$ NMR (176.04 MHz, $\text{CD}_3\text{OD}$ ) spectrum of compound <b>3a</b>                                                                                | 28   |
| <b>Figure S26.</b> COSY (700.13 MHz, $\text{CD}_3\text{OD}$ ) spectrum of compound <b>3a</b>                                                                                               | 29   |
| <b>Figure S27.</b> HSQC (700.13 MHz, $\text{CD}_3\text{OD}$ ) spectrum of compound <b>3a</b>                                                                                               | 30   |
| <b>Figure S28.</b> HMBC (700.13 MHz, $\text{CD}_3\text{OD}$ ) spectrum of compound <b>3a</b>                                                                                               | 31   |
| <b>Figure S29.</b> ROESY (700.13 MHz, $\text{CD}_3\text{OD}$ ) spectrum of compound <b>3a</b>                                                                                              | 32   |

|                                                                                                            |    |
|------------------------------------------------------------------------------------------------------------|----|
| <b>Figure S30.</b> HRESIMS spectra of compound <b>4</b>                                                    | 33 |
| <b>Figure S31.</b> $^1\text{H}$ NMR (700.13 MHz, $\text{CD}_3\text{OD}$ ) spectrum of compound <b>4</b>    | 34 |
| <b>Figure S32.</b> $^{13}\text{C}$ NMR (176.04 MHz, $\text{CD}_3\text{OD}$ ) spectrum of compound <b>4</b> | 35 |
| <b>Figure S33.</b> COSY (700.13 MHz, $\text{CD}_3\text{OD}$ ) spectrum of compound <b>4</b>                | 36 |
| <b>Figure S34.</b> HSQC (700.13 MHz, $\text{CD}_3\text{OD}$ ) spectrum of compound <b>4</b>                | 37 |
| <b>Figure S35.</b> HMBC (700.13 MHz, $\text{CD}_3\text{OD}$ ) spectrum of compound <b>4</b>                | 38 |
| <b>Figure S36.</b> ROESY (700.13 MHz, $\text{CD}_3\text{OD}$ ) spectrum of compound <b>4</b>               | 39 |
| <b>Figure S37.</b> HRESIMS spectra of compound <b>5</b>                                                    | 40 |
| <b>Figure S38.</b> $^1\text{H}$ NMR (700.13 MHz, $\text{CD}_3\text{OD}$ ) spectrum of compound <b>5</b>    | 41 |
| <b>Figure S39.</b> $^{13}\text{C}$ NMR (176.04 MHz, $\text{CD}_3\text{OD}$ ) spectrum of compound <b>5</b> | 42 |
| <b>Figure S40.</b> COSY (700.13 MHz, $\text{CD}_3\text{OD}$ ) spectrum of compound <b>5</b>                | 43 |
| <b>Figure S41.</b> HSQC (700.13 MHz, $\text{CD}_3\text{OD}$ ) spectrum of compound <b>5</b>                | 44 |
| <b>Figure S42.</b> HMBC (700.13 MHz, $\text{CD}_3\text{OD}$ ) spectrum of compound <b>5</b>                | 45 |
| <b>Figure S43.</b> ROESY (700.13 MHz, $\text{CD}_3\text{OD}$ ) spectrum of compound <b>5</b>               | 46 |

**Figure S1.** HRESIMS spectra of compound **1**.

(-)HRESIMS  $[M - Na]^-$  ion

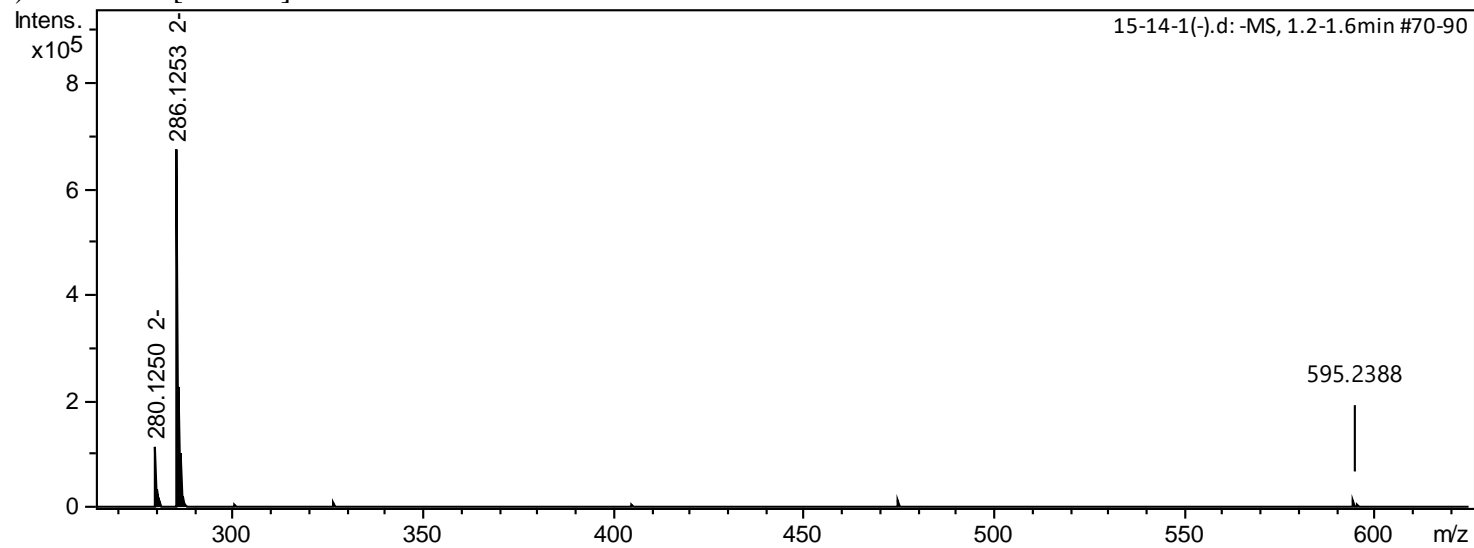

(+)HRESIMS  $[M + Na]^+$  ion

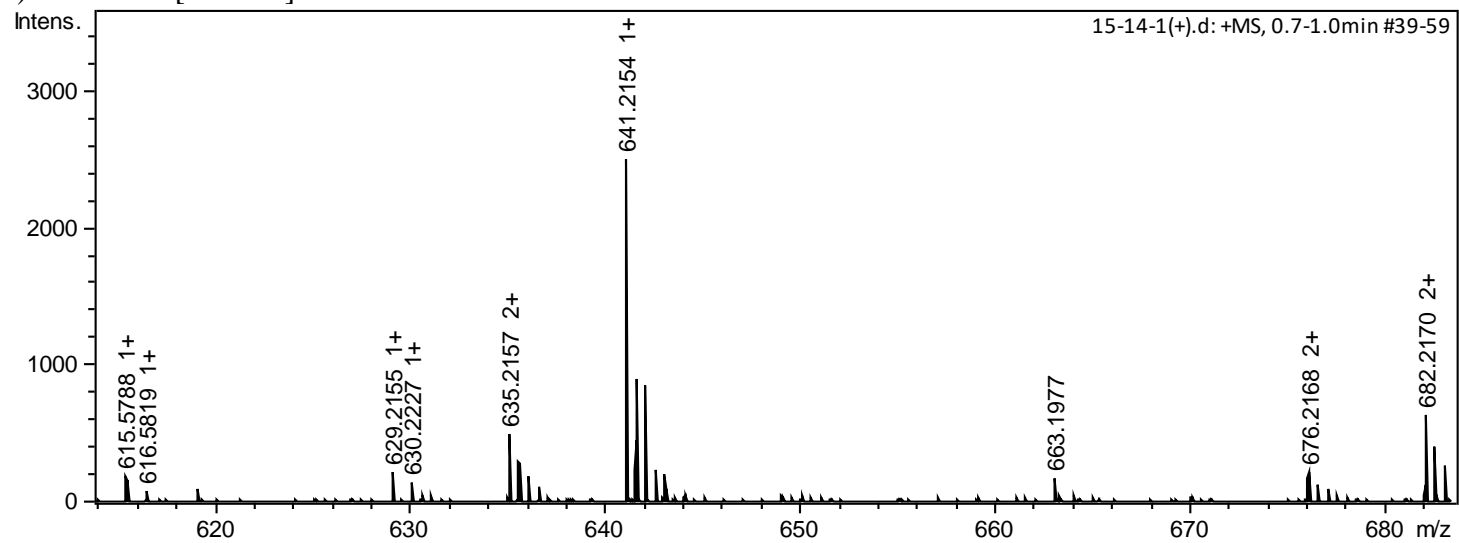

**Figure S2.**  $^1\text{H}$  NMR (700.13 MHz,  $\text{CD}_3\text{OD}$ ) spectrum of compound **1**.

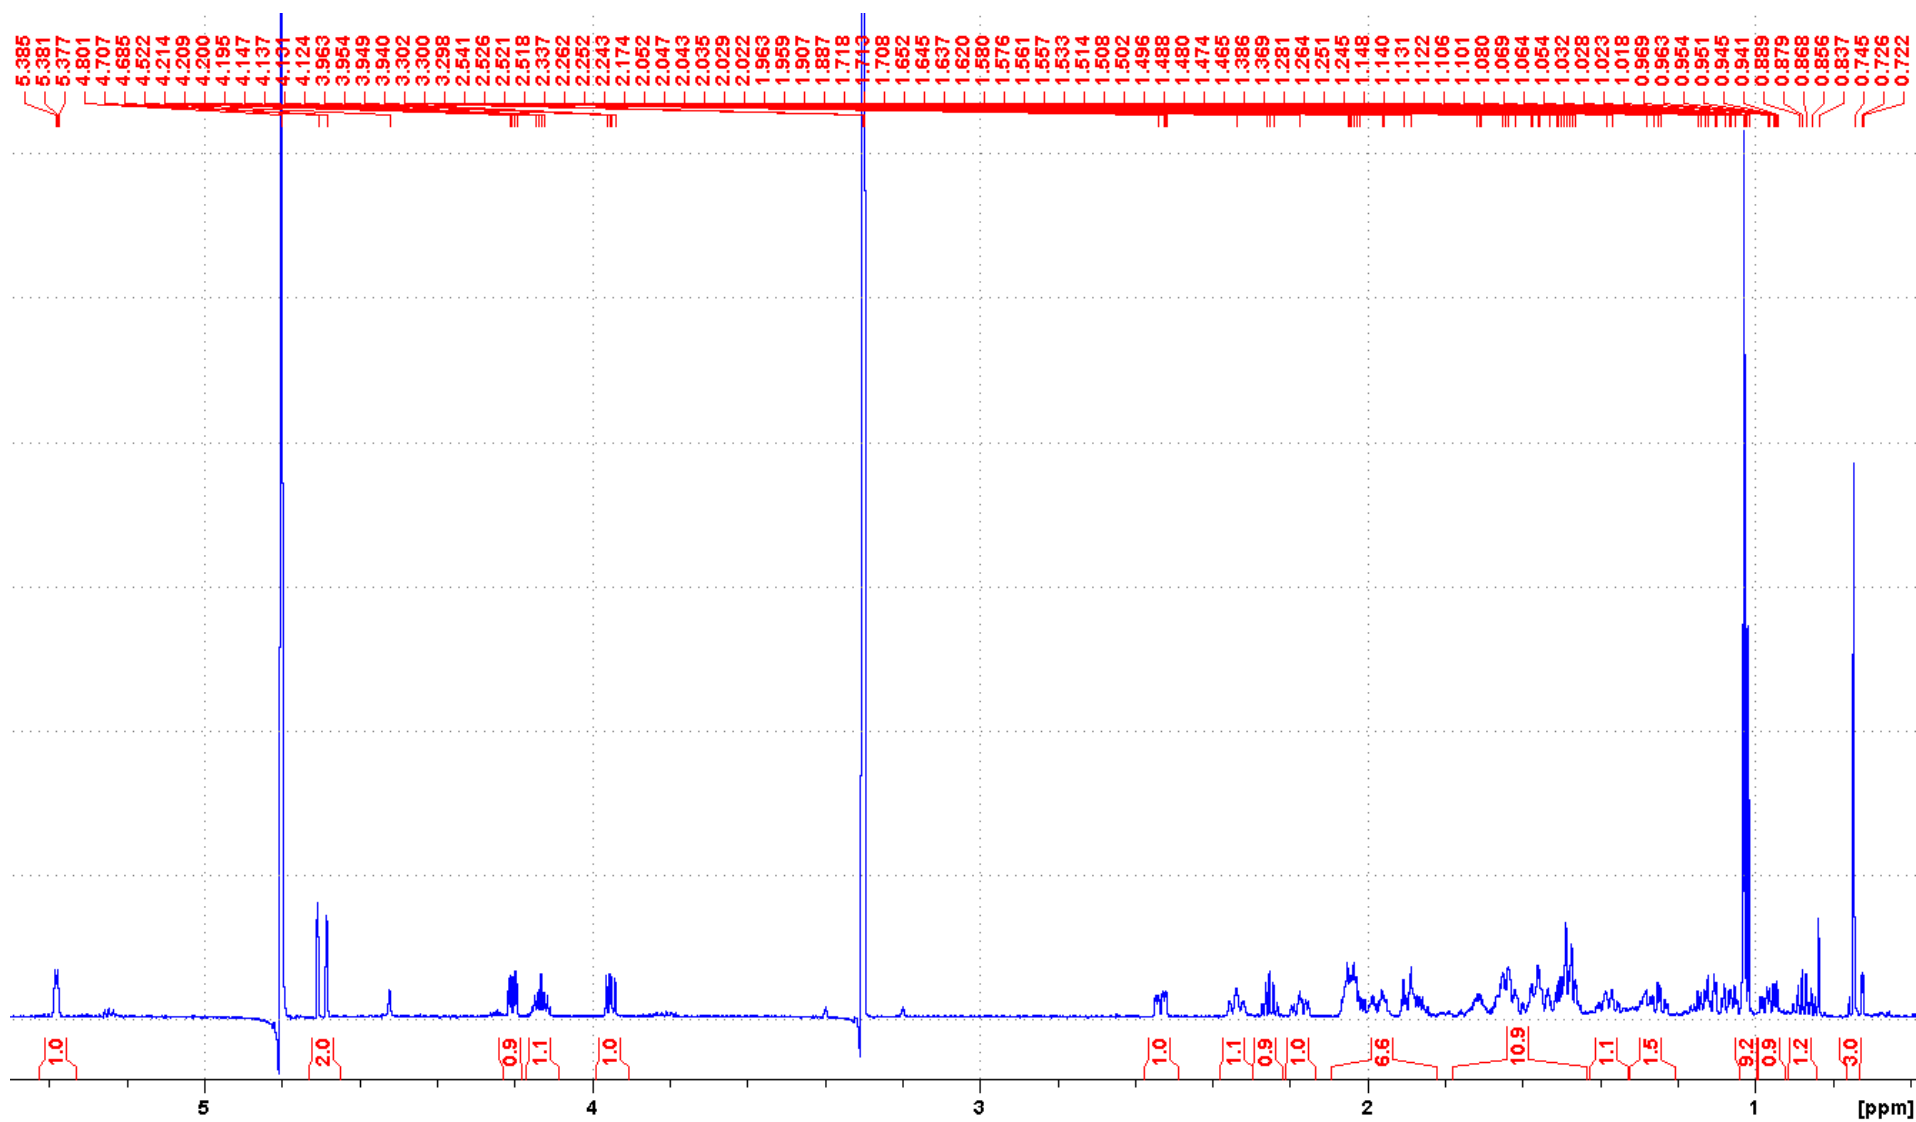

**Figure S3.**  $^{13}\text{C}$  NMR (176.04 MHz,  $\text{CD}_3\text{OD}$ ) spectrum of compound **1**.

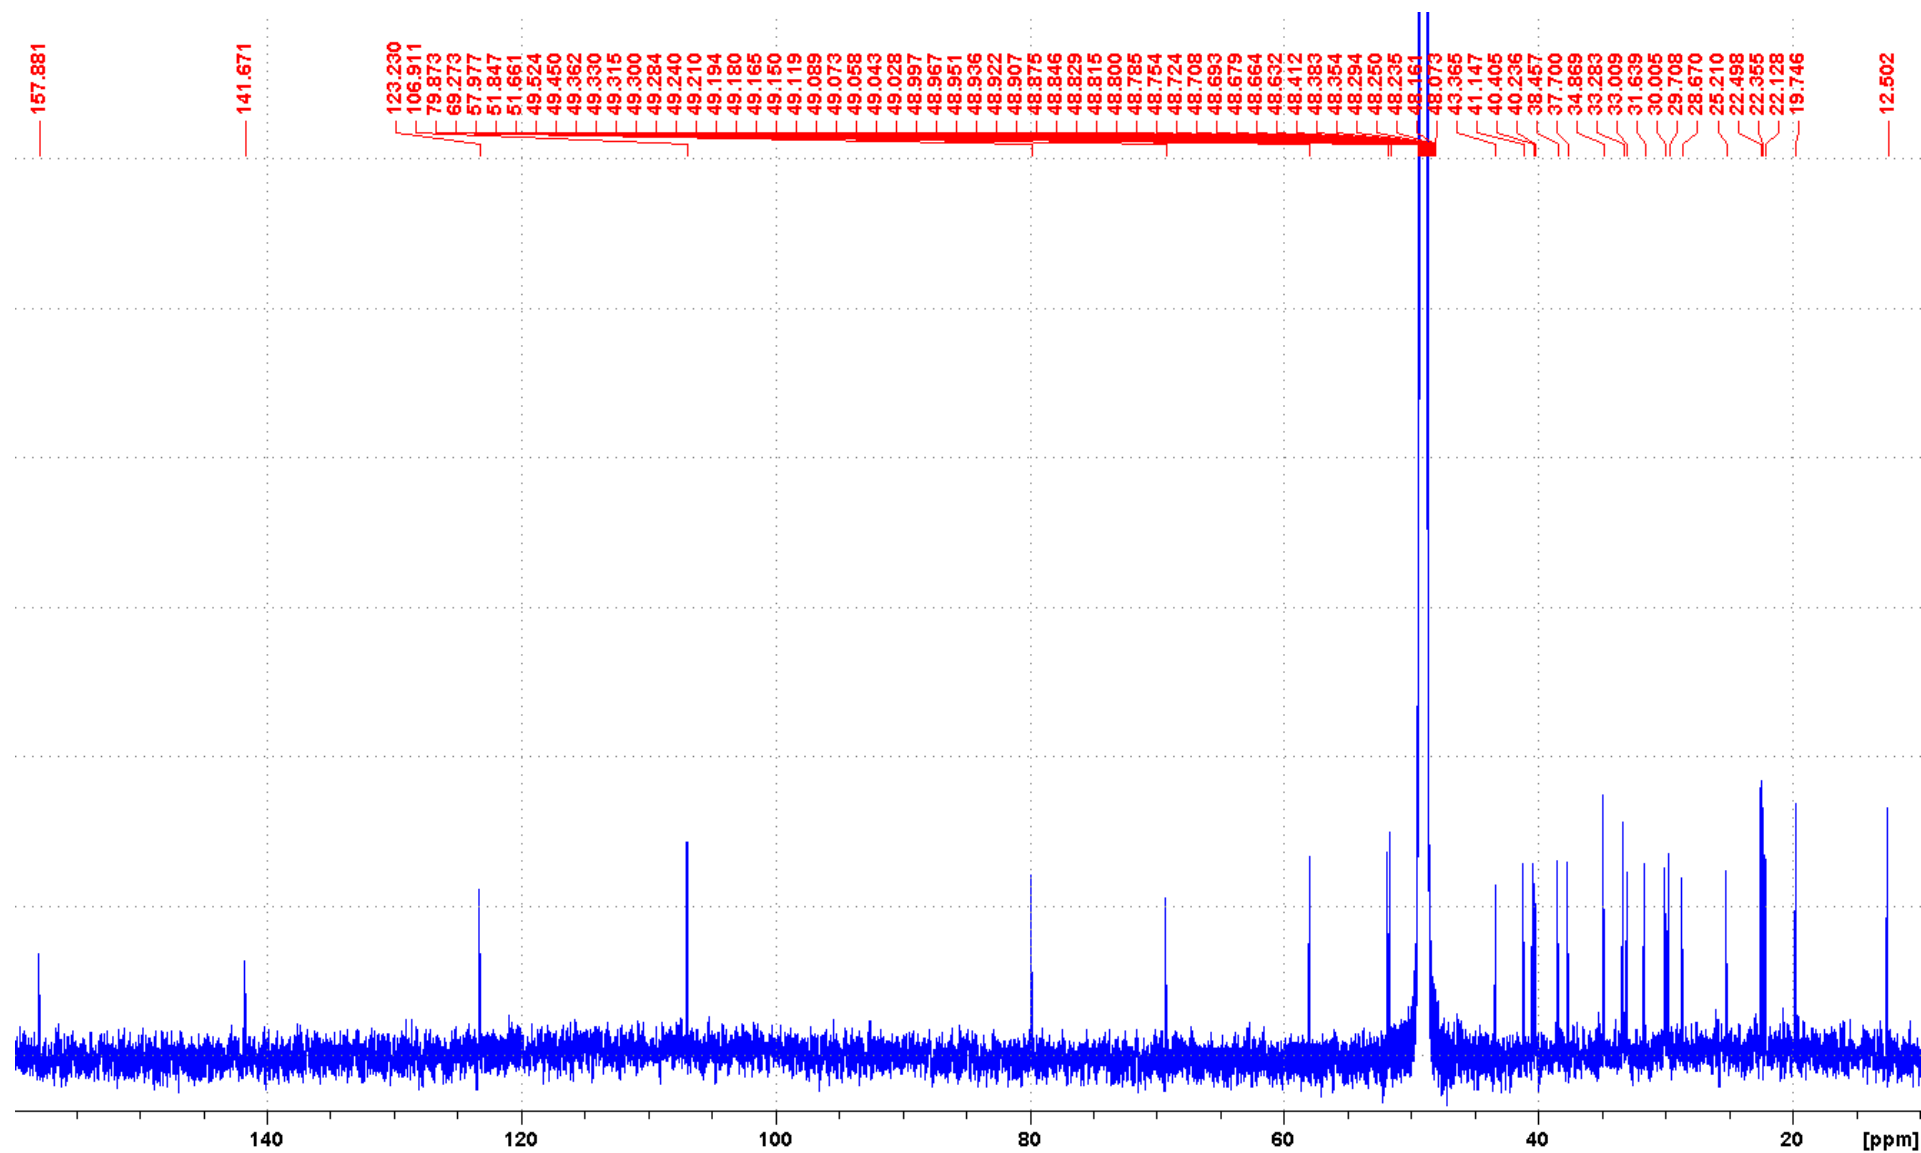

**Figure S4.** COSY (700.13 MHz, CD<sub>3</sub>OD) spectrum of compound **1**.

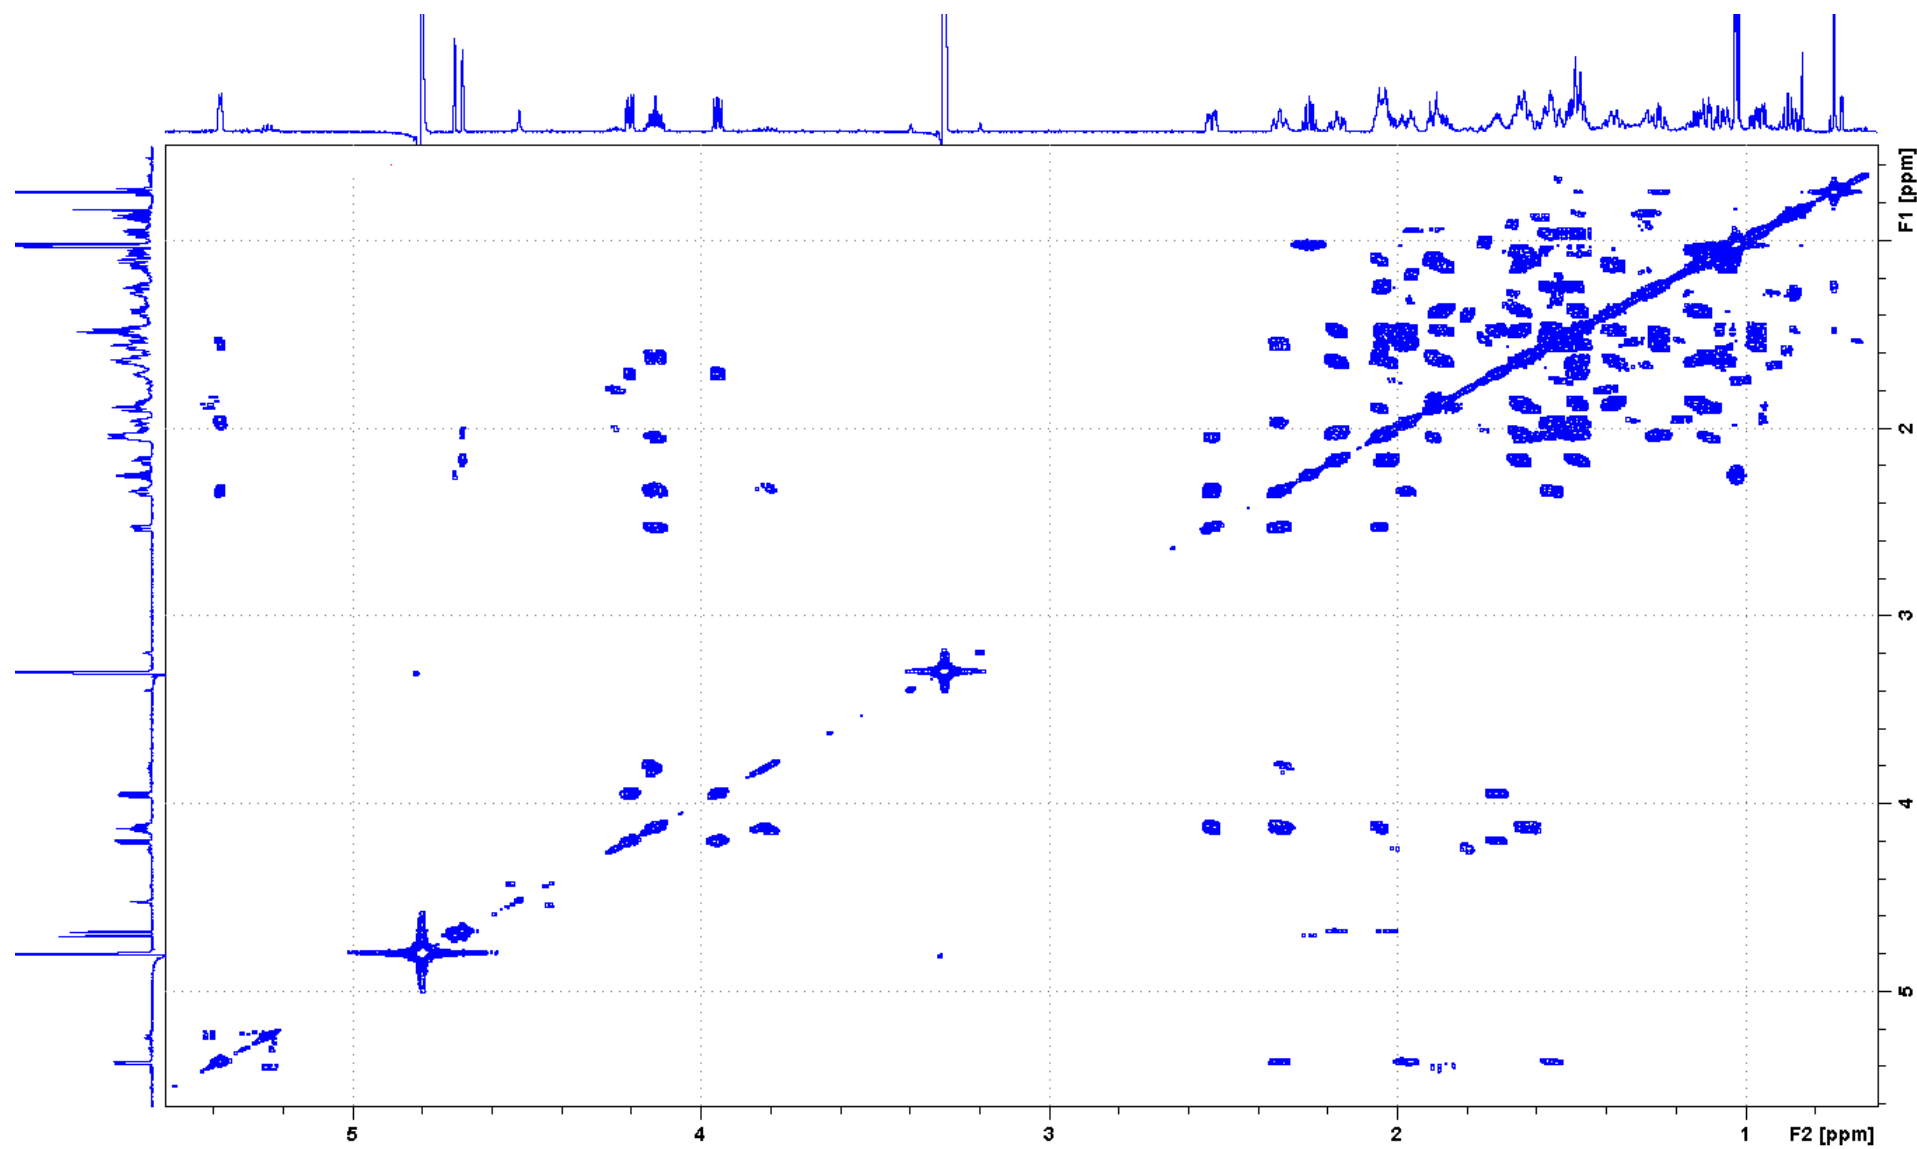

**Figure S5.** HSQC (700.13 MHz, CD<sub>3</sub>OD) spectrum of compound **1**.

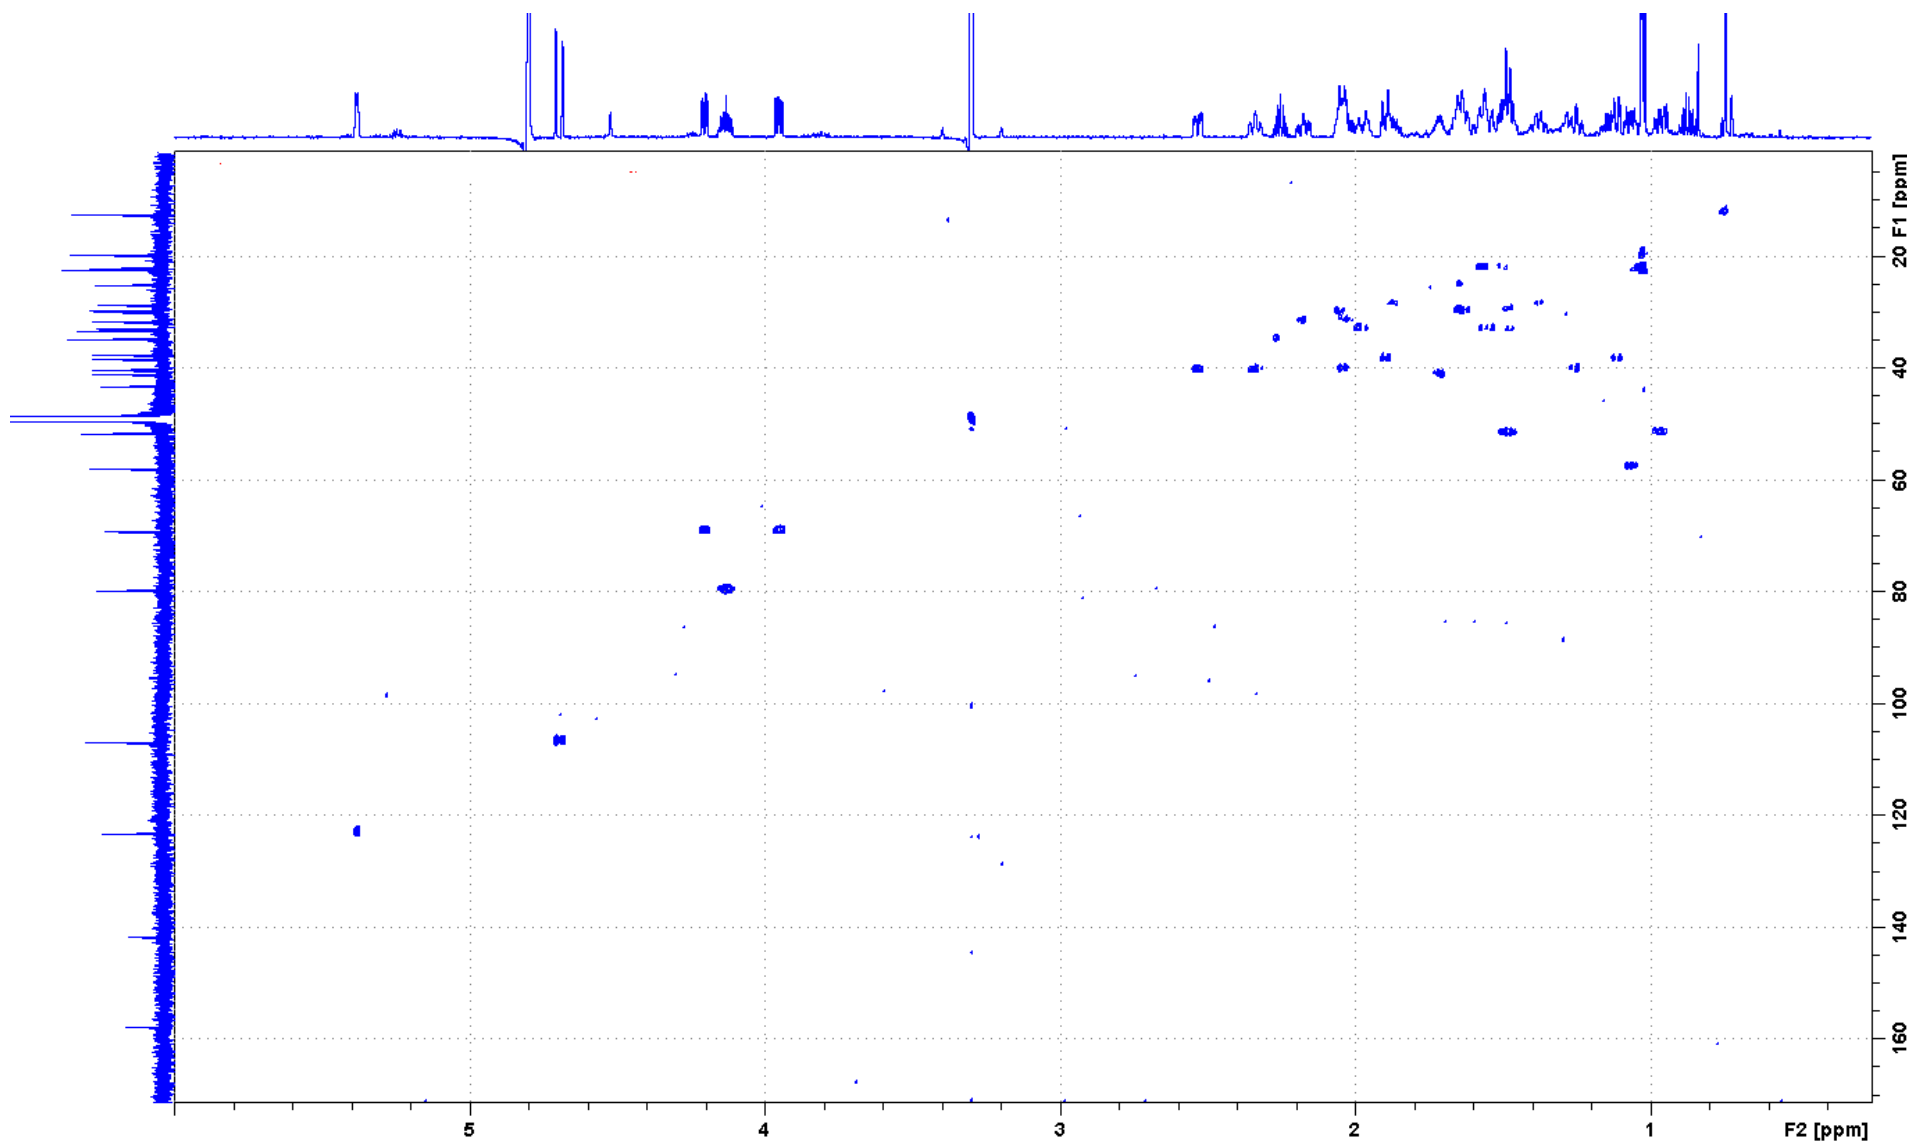



**Figure S6.** HMBC (700.13 MHz, CD<sub>3</sub>OD) spectrum of compound **1**.

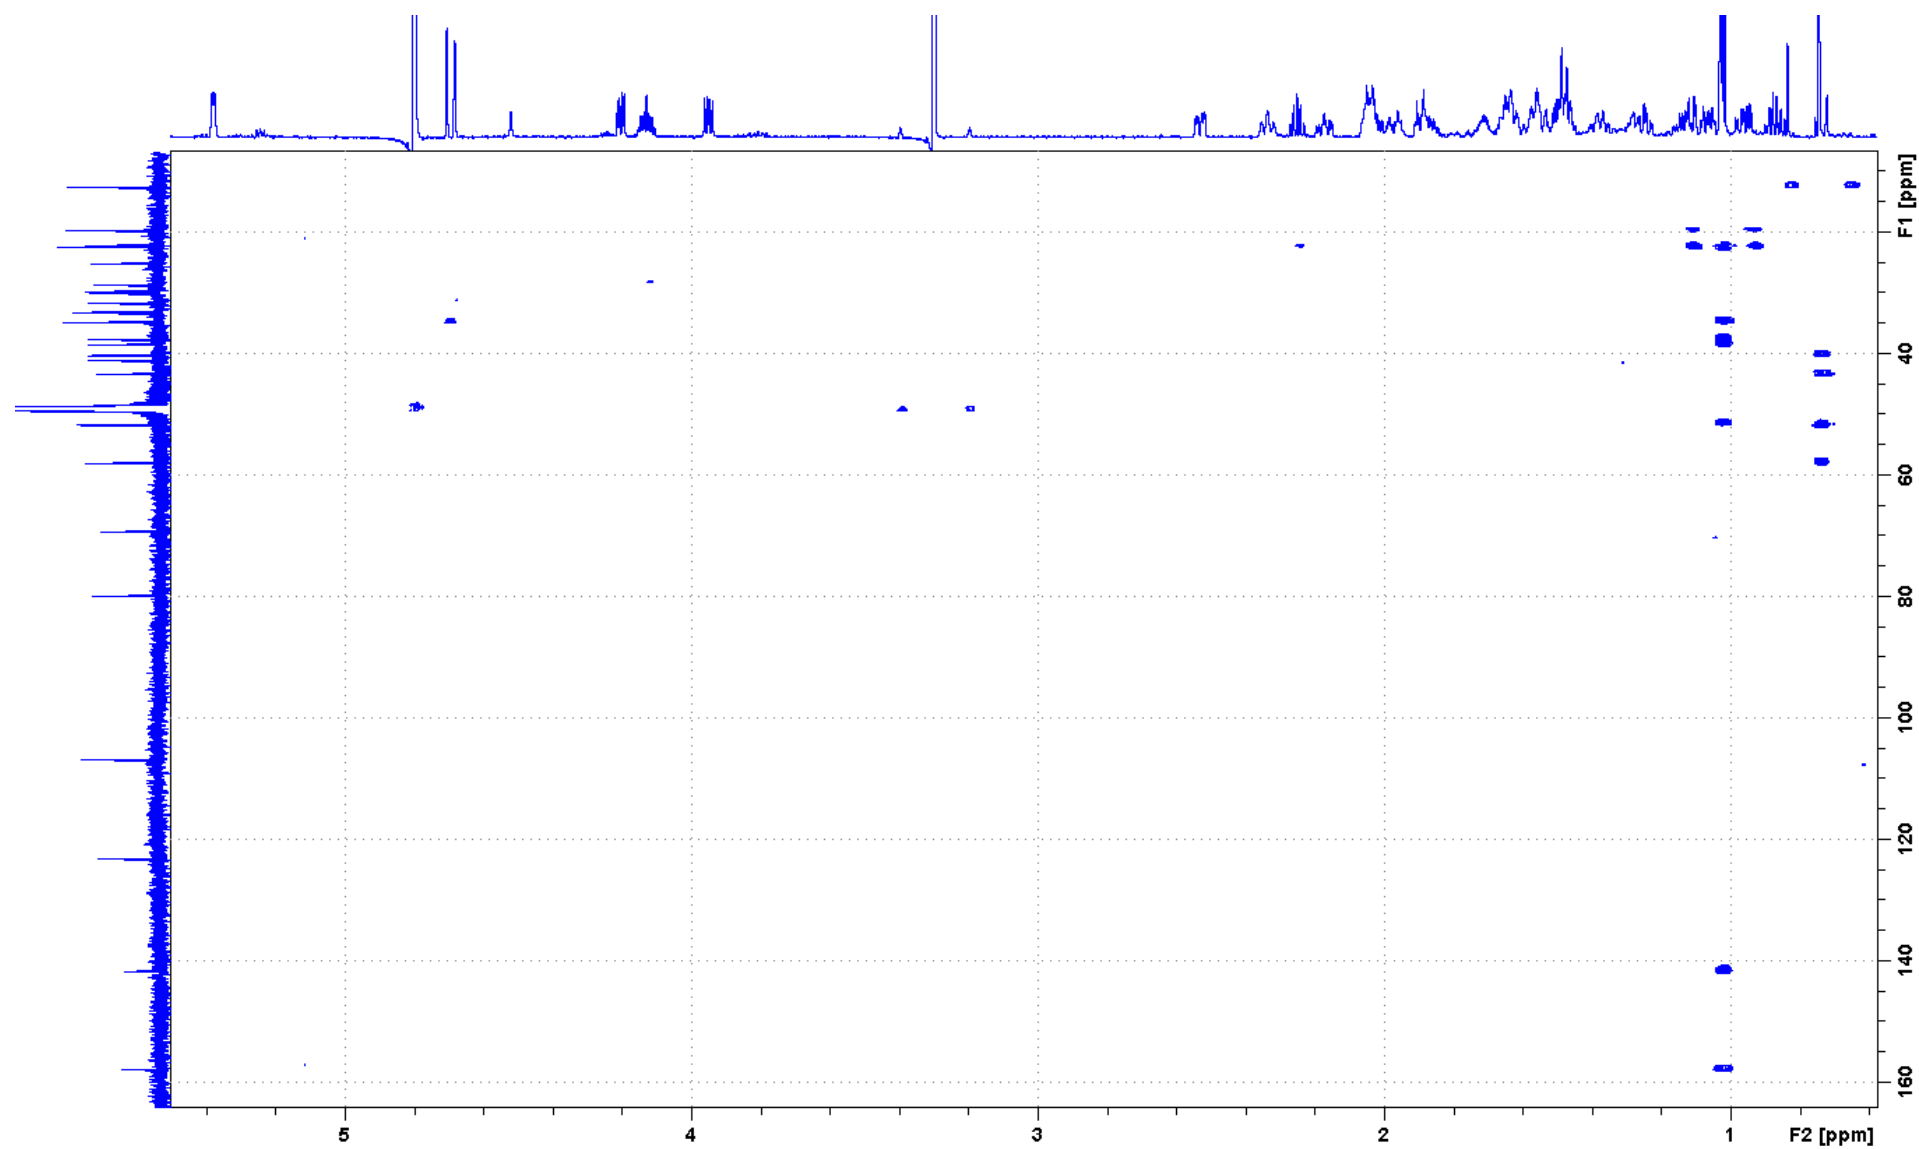

**Figure S7.** ROESY (700.13 MHz, CD<sub>3</sub>OD) spectrum of compound **1**.

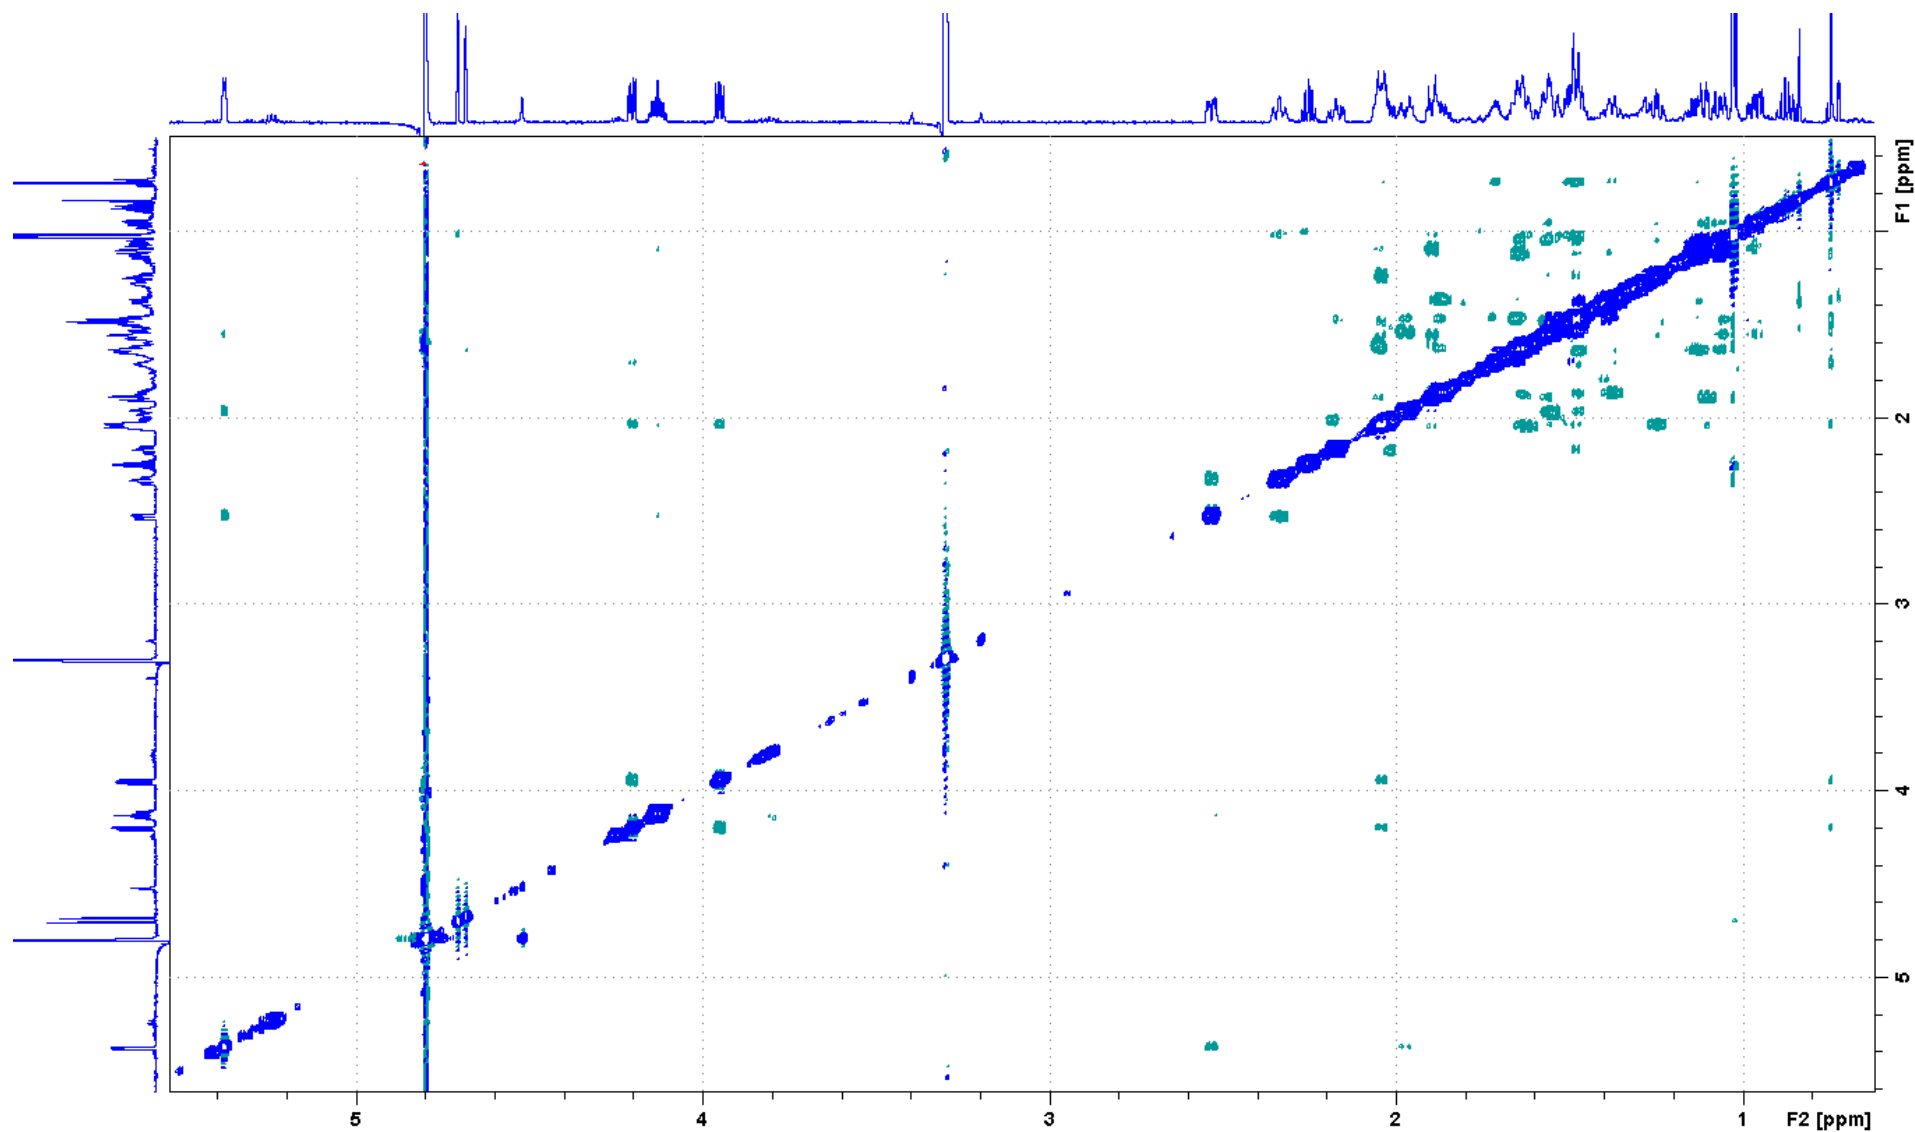

**Figure S8.**  $^1\text{H}$  NMR (700.13 MHz,  $\text{CD}_3\text{OD}$ ) spectrum of the mixture of **2** and **3**.

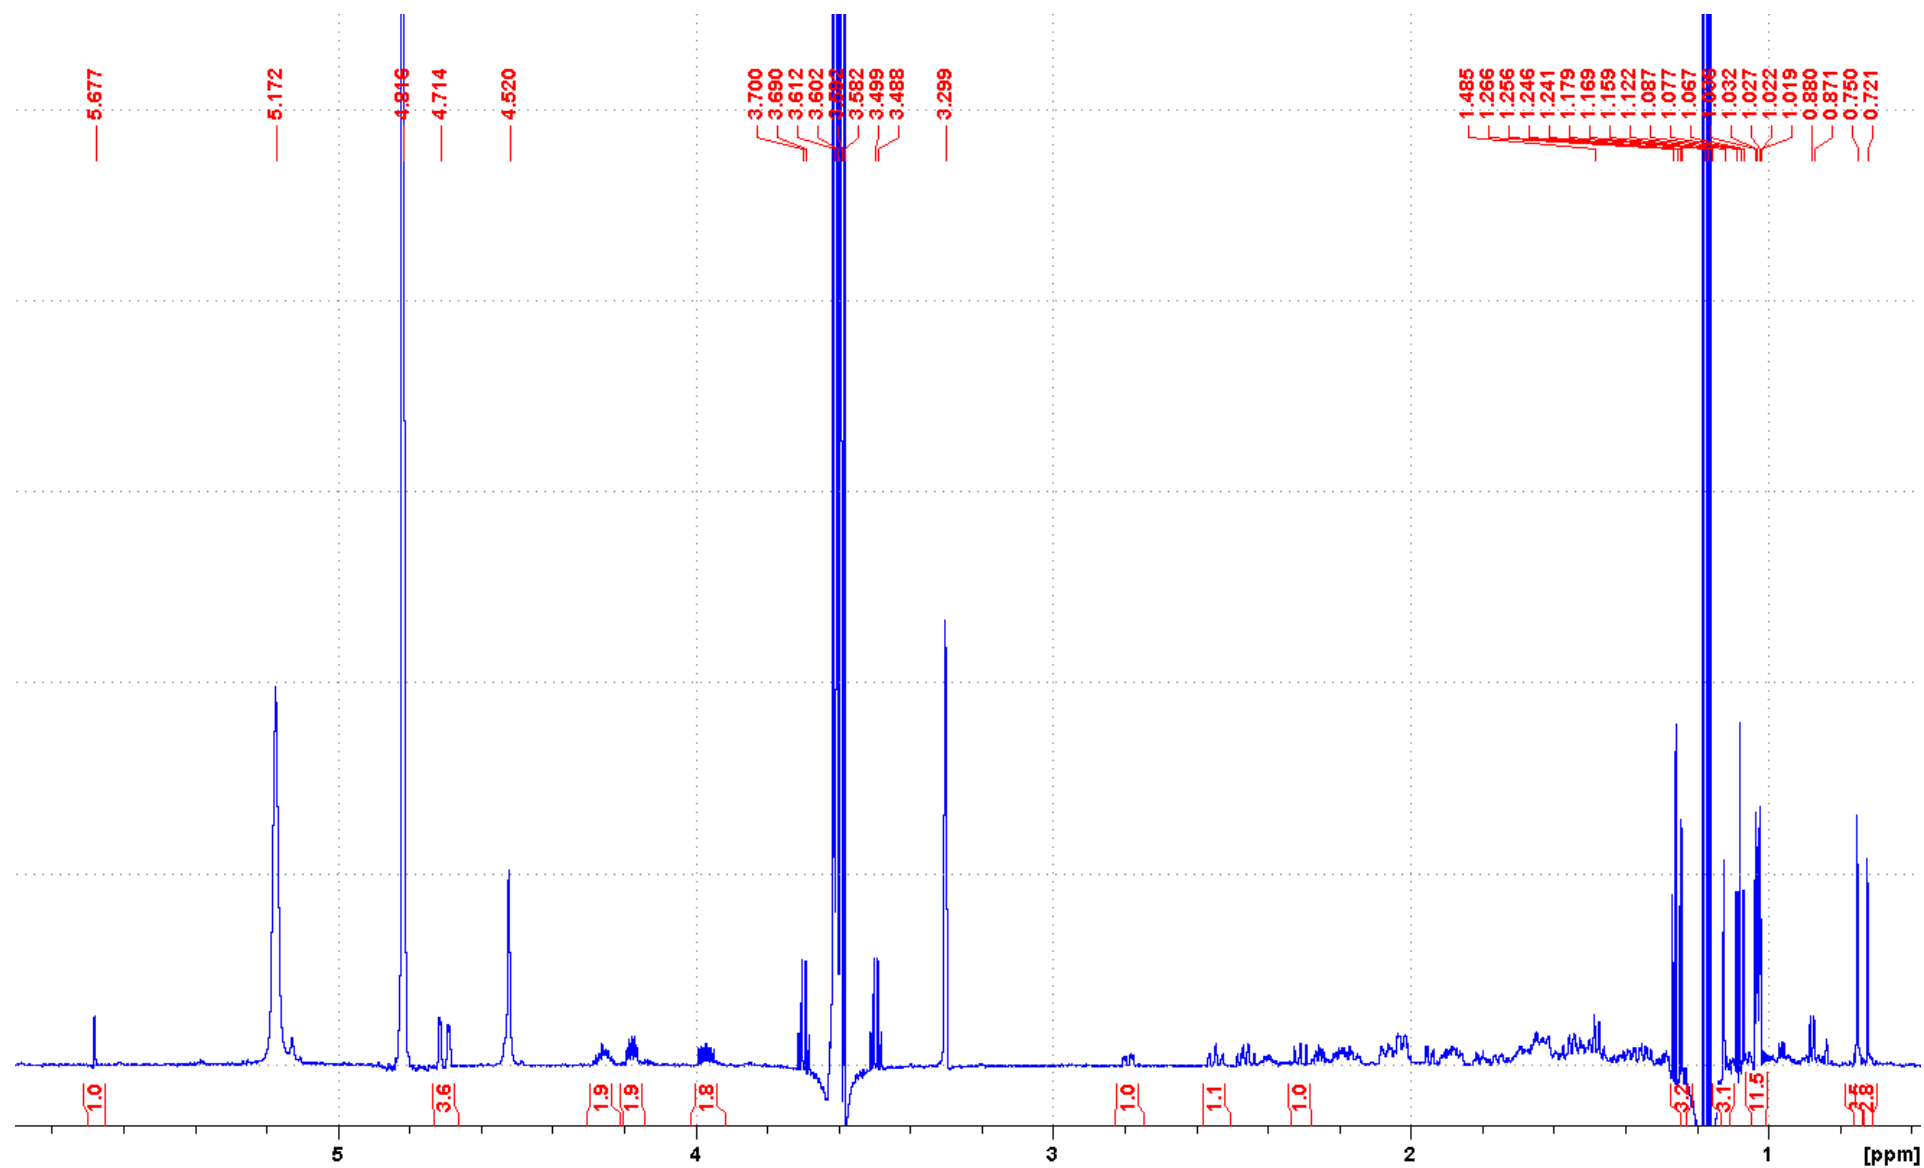

**Figure S9.**  $^{13}\text{C}$  NMR (176.04 MHz,  $\text{CD}_3\text{OD}$ ) spectrum of the mixture of **2** and **3**.

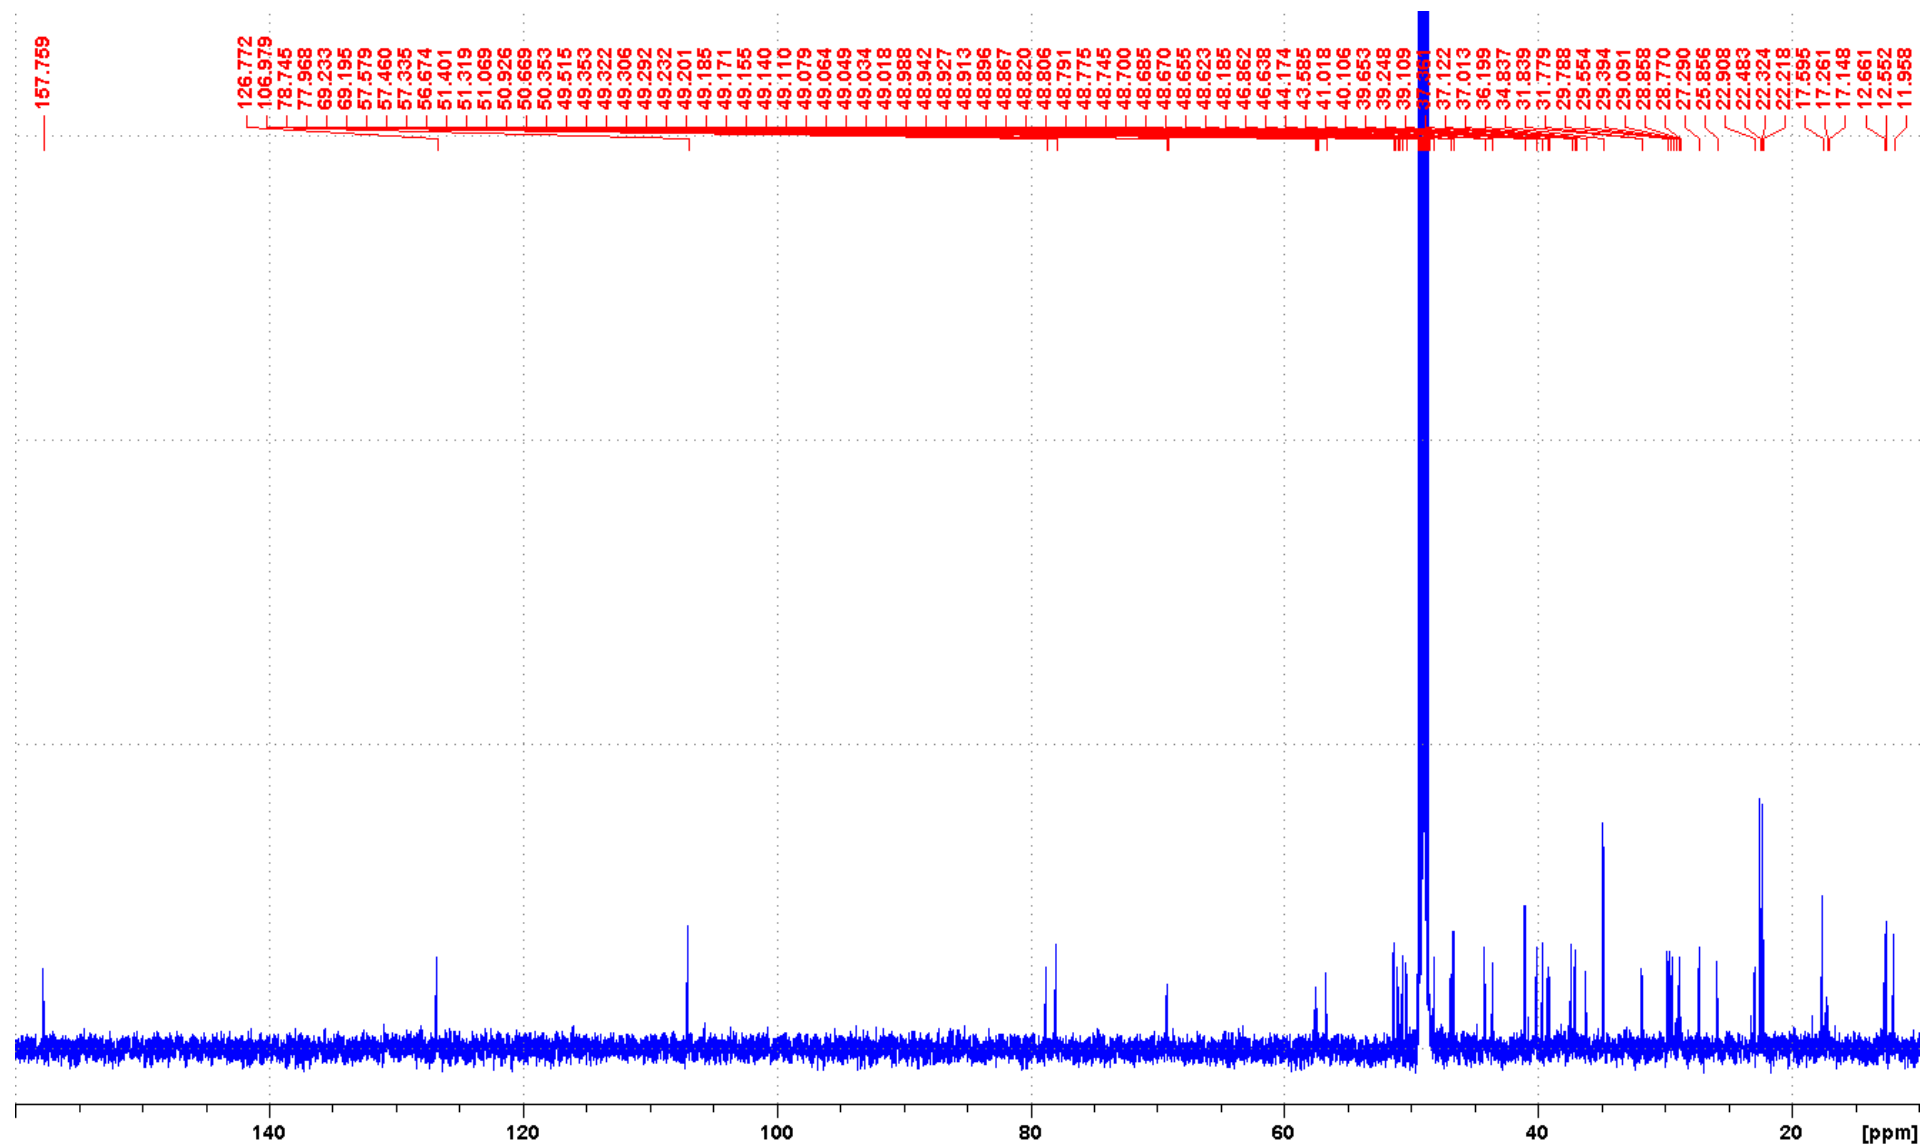

**Figure S10.** COSY (700.13 MHz, CD<sub>3</sub>OD) spectrum of the mixture of **2** and **3**.

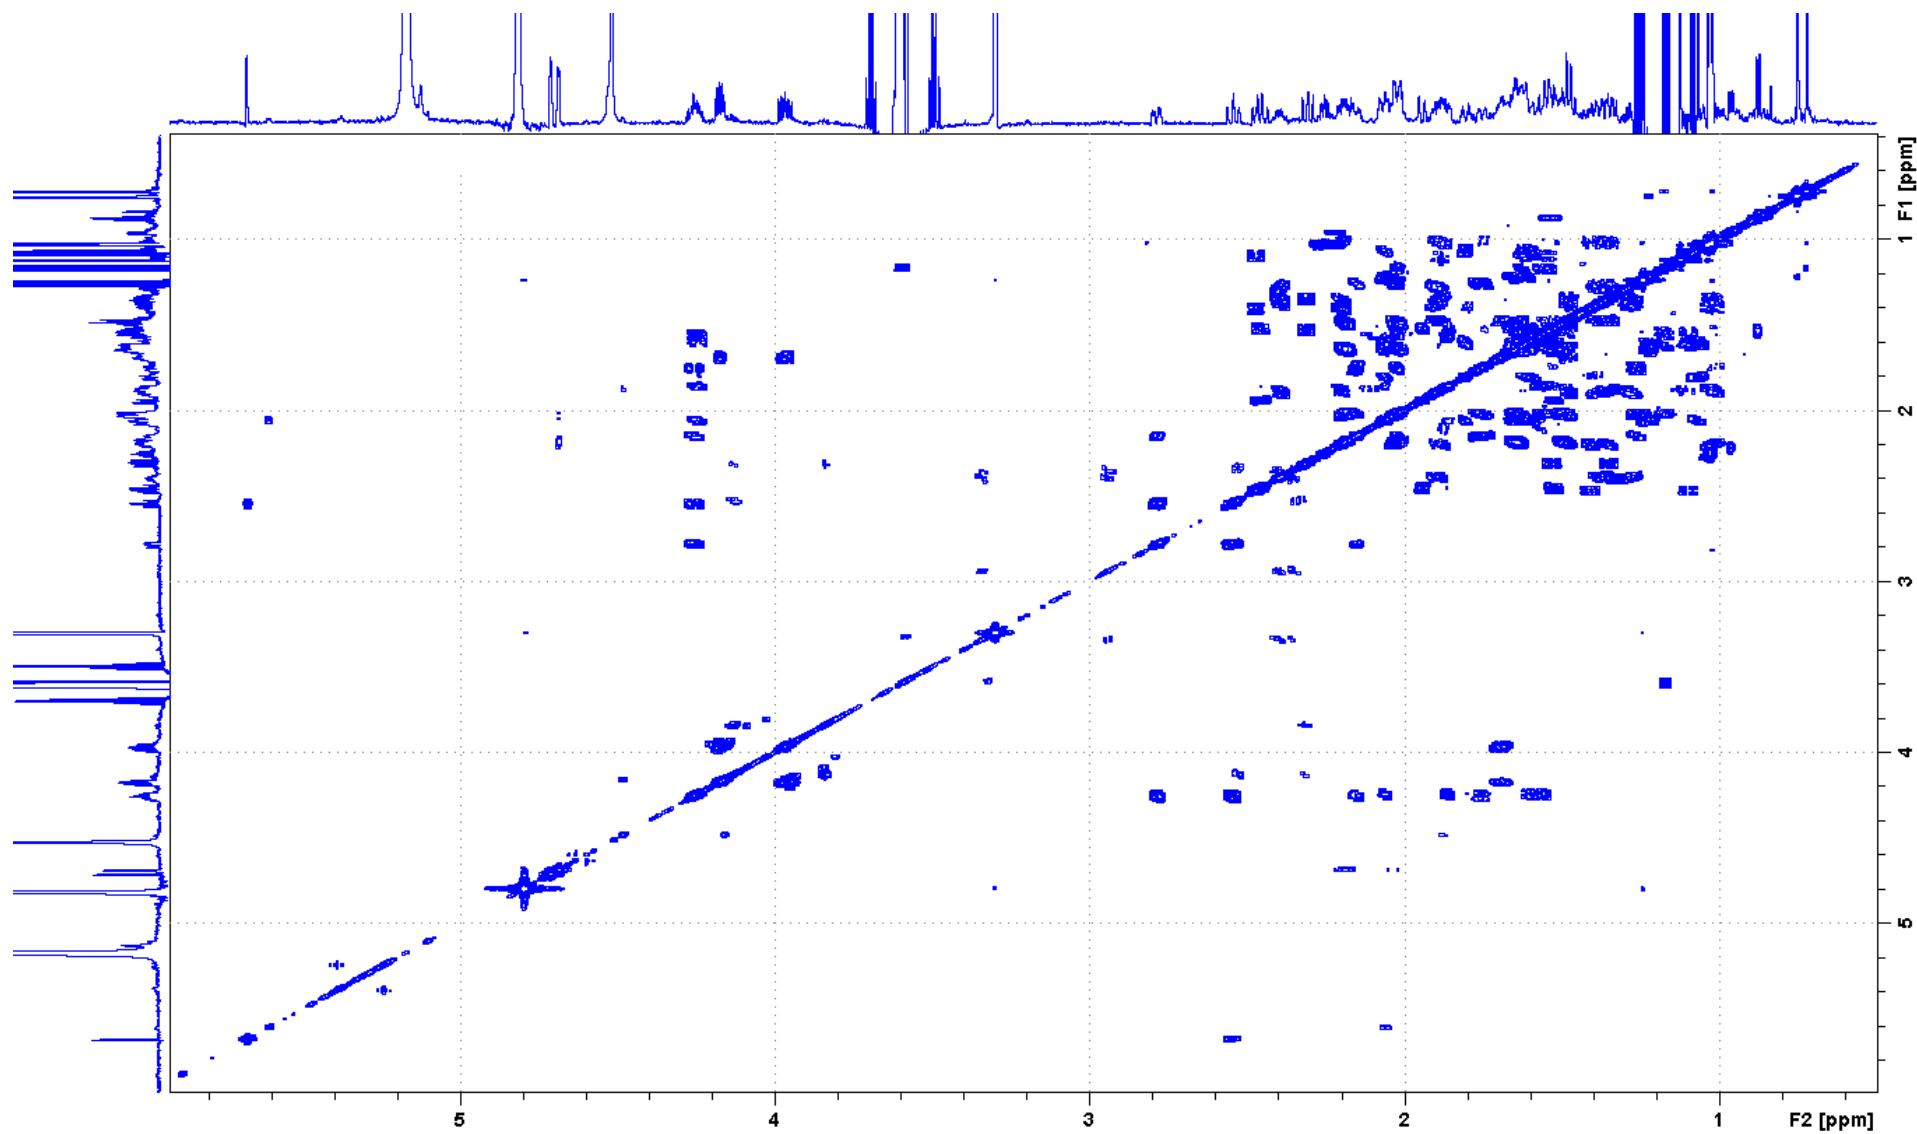

**Figure S11.** HSQC (700.13 MHz, CD<sub>3</sub>OD) spectrum of the mixture of **2** and **3**.

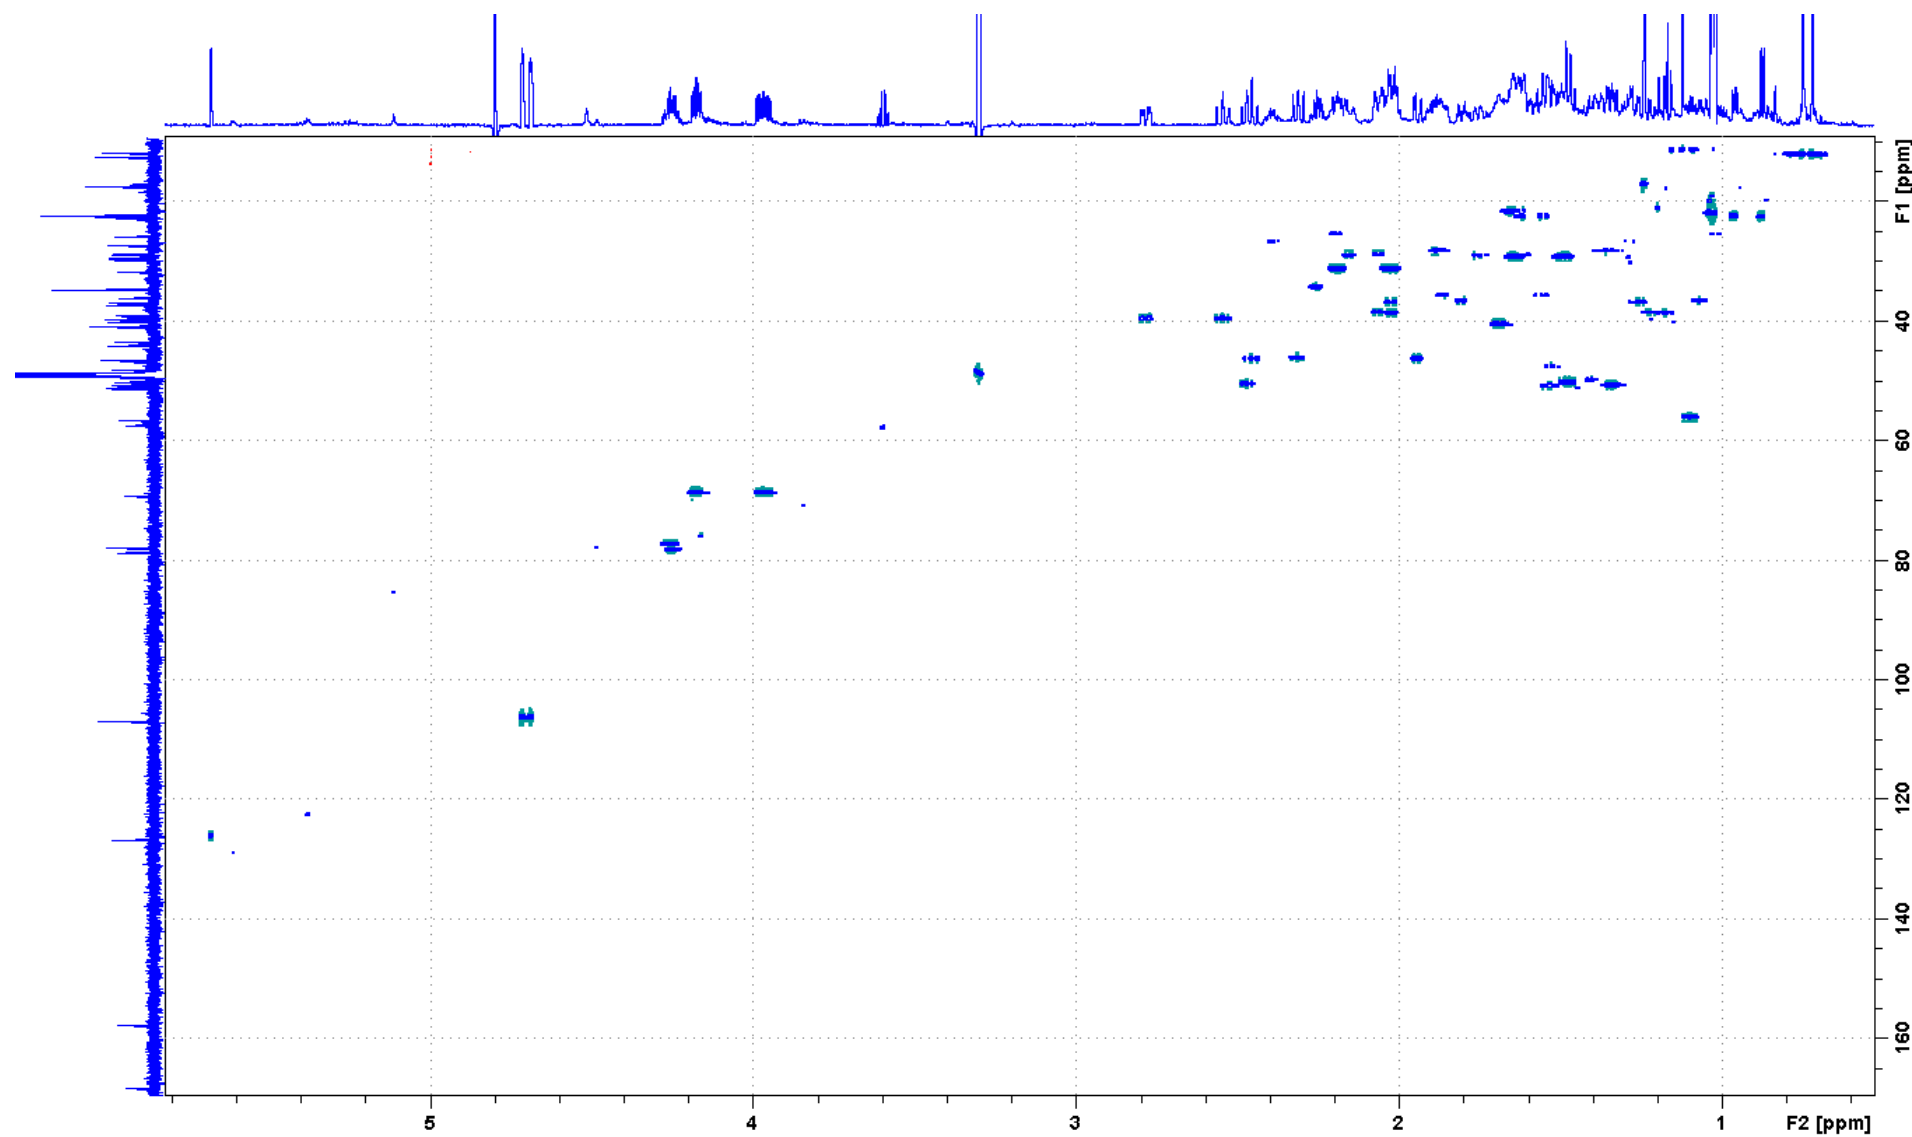

**Figure S12.** HMBC (700.13 MHz, CD<sub>3</sub>OD) spectrum of the mixture of **2** and **3**.

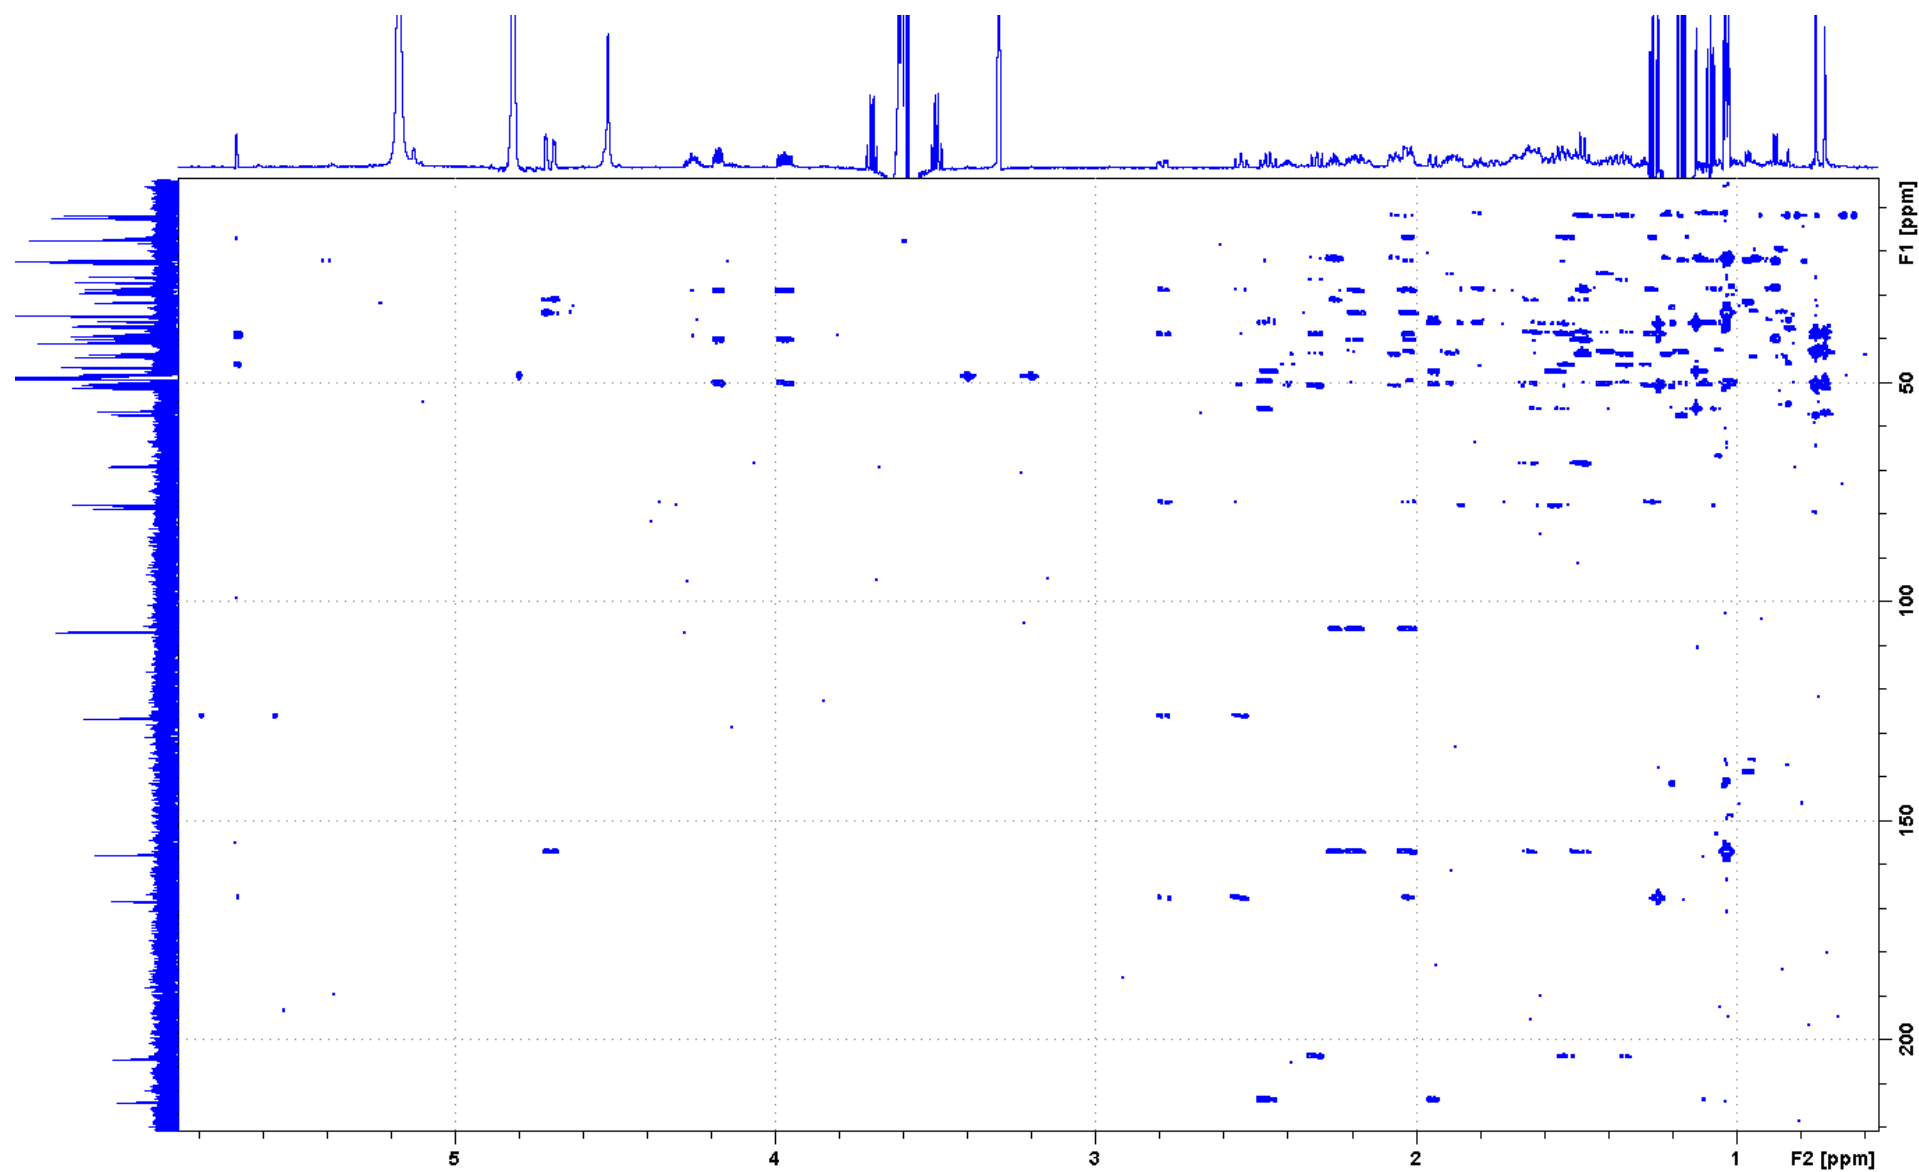

**Figure S13.** ROESY (700.13 MHz, CD<sub>3</sub>OD) spectrum of the mixture of **2** and **3**.

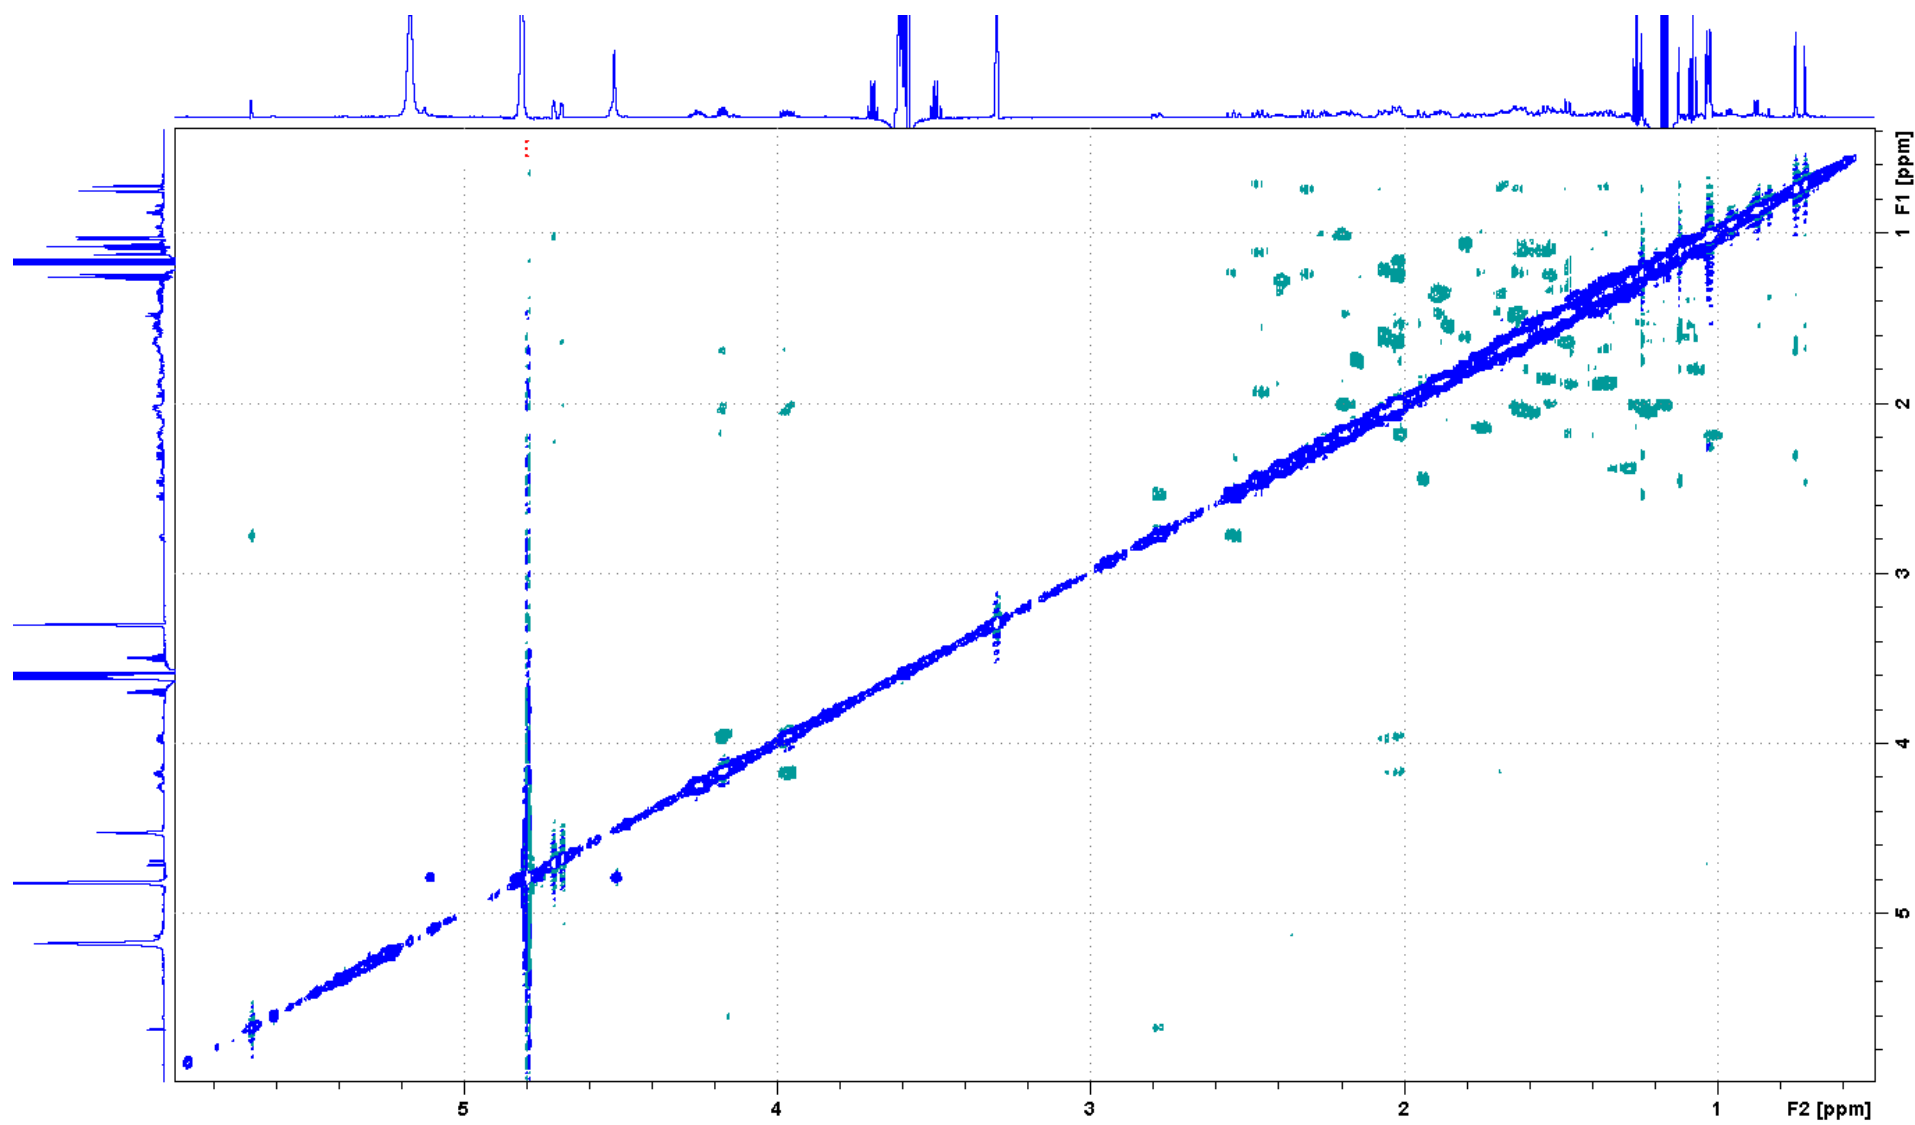



**Figure S14.** HRESIMS spectra of the mixture of **2** and **3**.**(-)HRESIMS**  $[M - Na]^-$  ion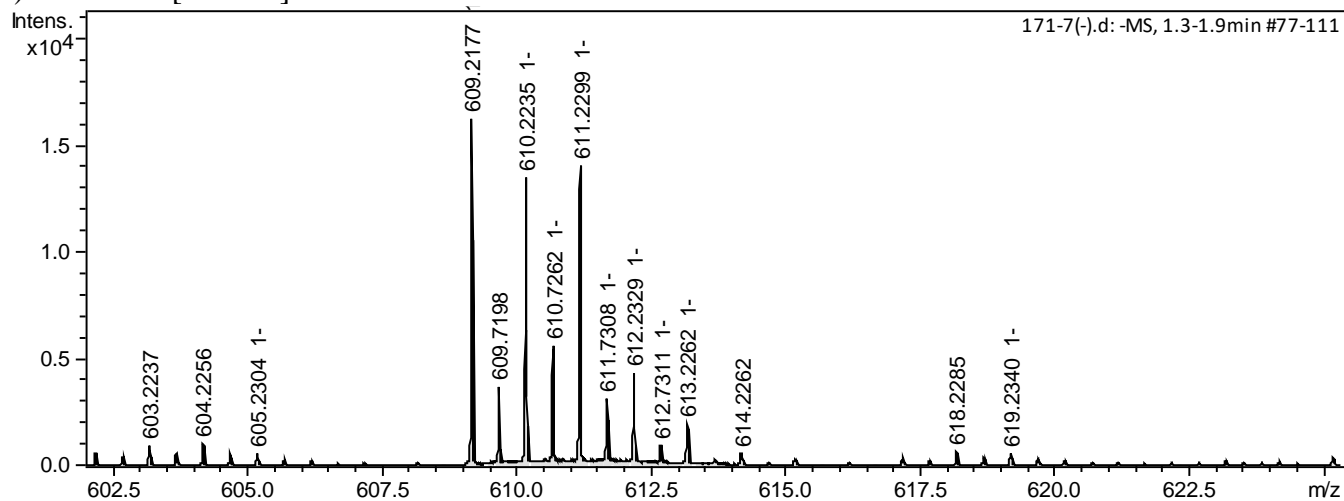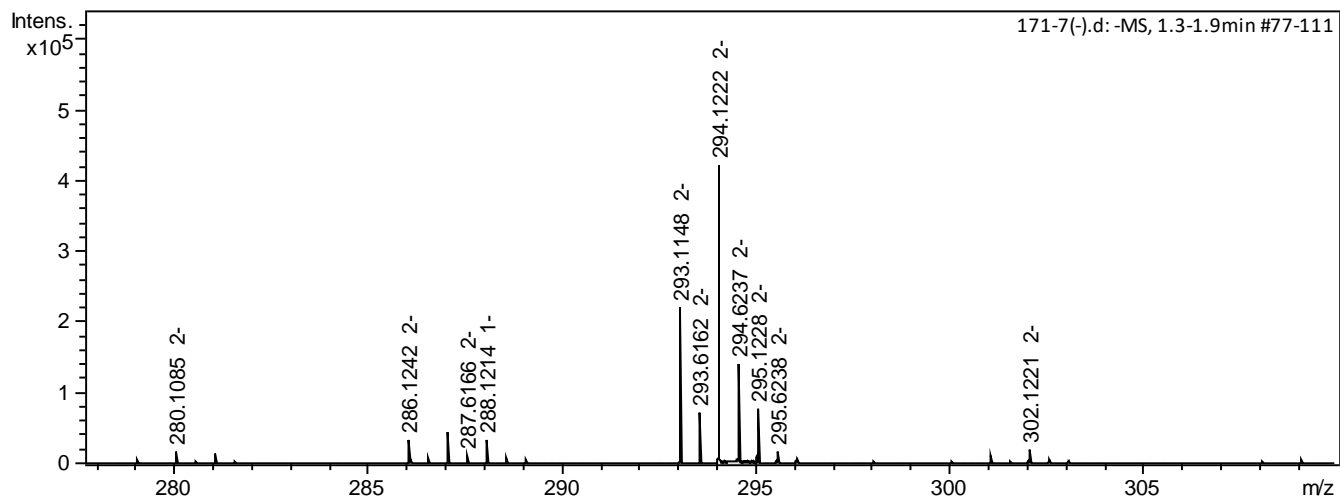**(+)HRESIMS**  $[M + Na]^+$  ion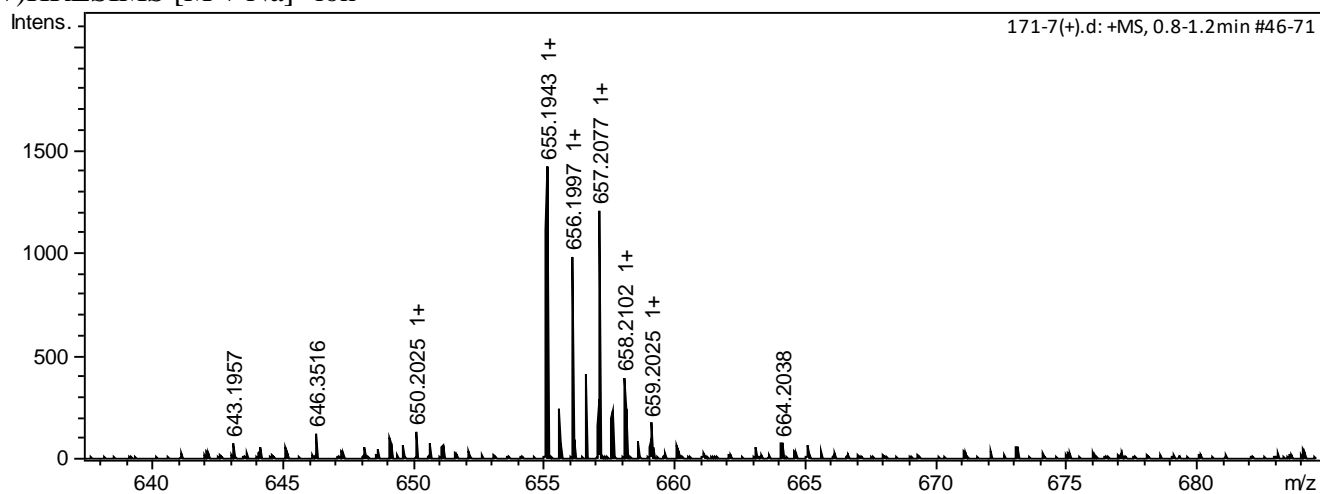

**Figure S15.** HRESIMS spectra of compound **2a**.**(-)HRESIMS [M – Na]<sup>–</sup> ion**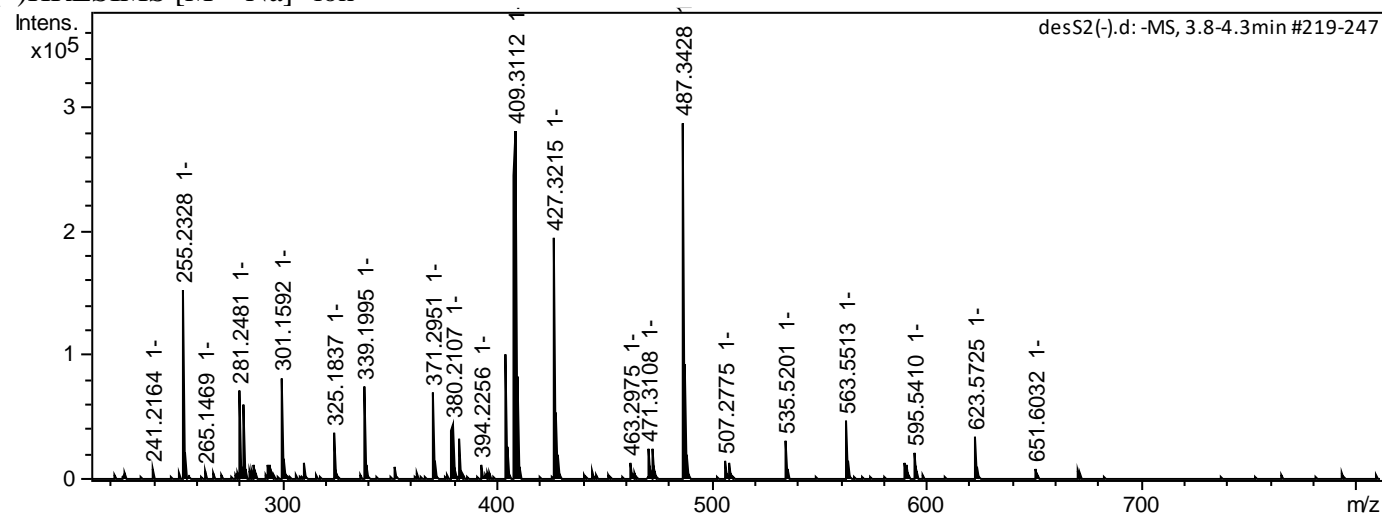**(+)HRESIMS [M + Na]<sup>+</sup> ion**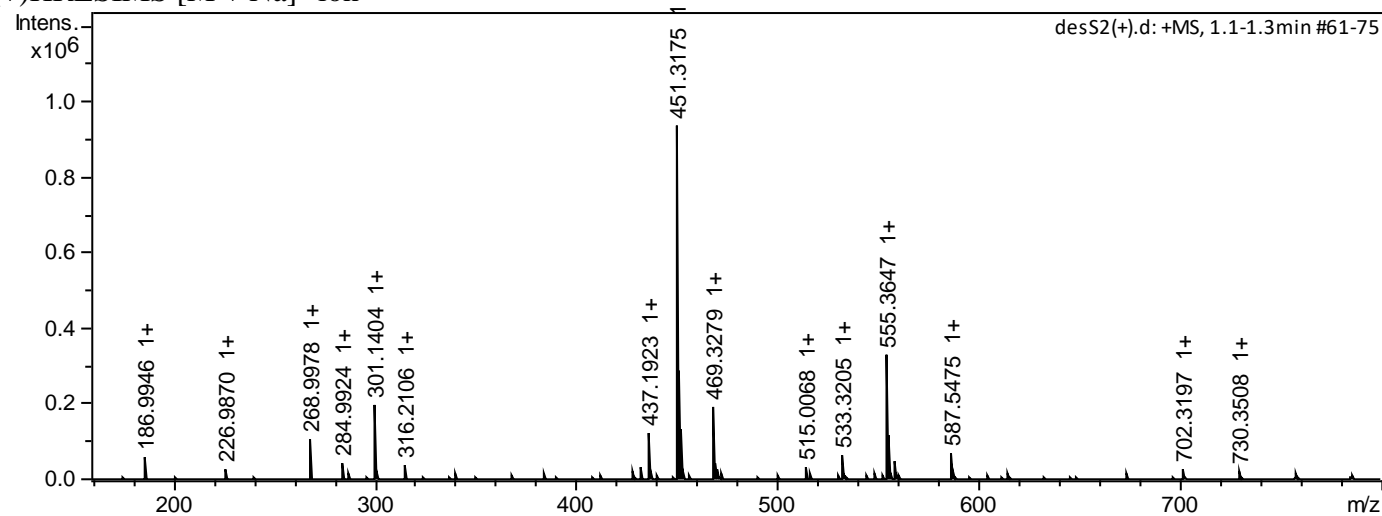

**Figure S16.** HRESIMS spectra of compound **3a**.**(-)HRESIMS**  $[M - Na]^-$  ion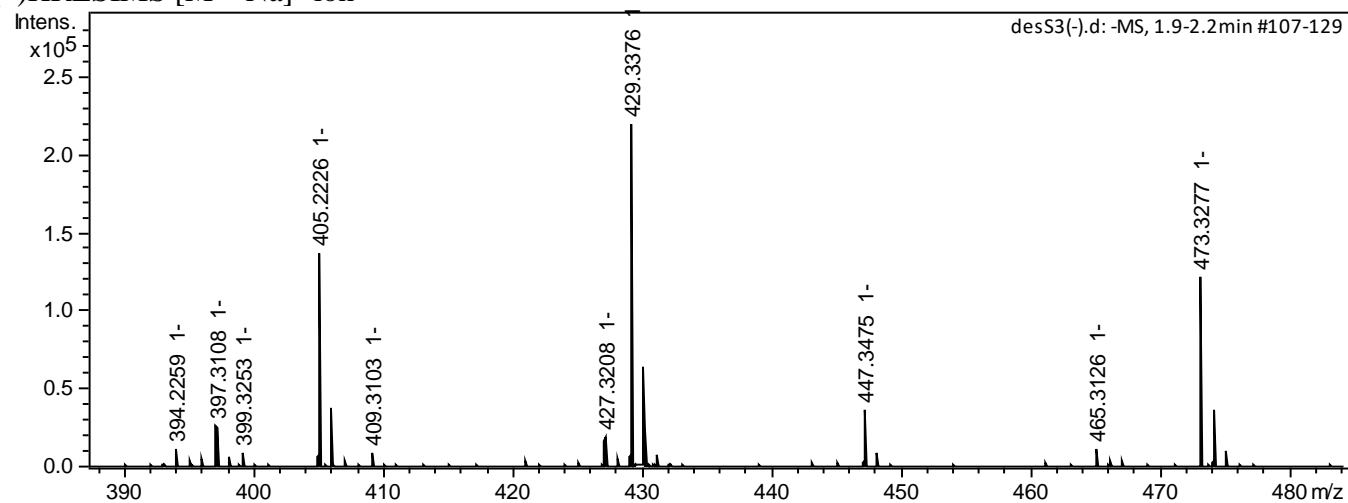**(+)HRESIMS**  $[M + Na]^+$  ion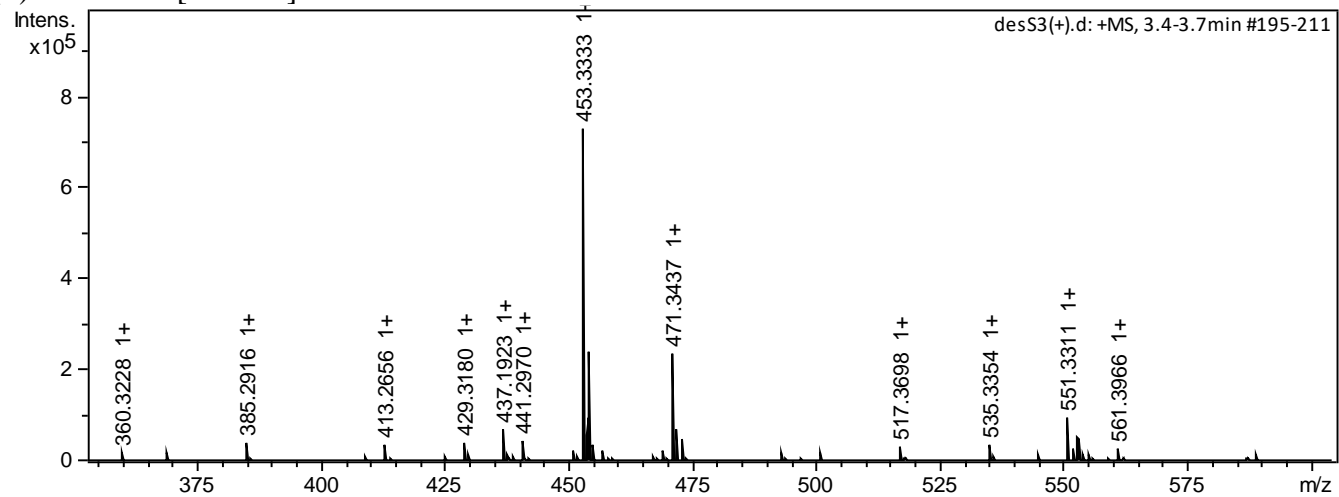

**Figure S17.** (A) COSY and key HMBC correlations of the mixture of compounds **2a** and **3a**. (B) Key ROESY correlations of the mixture of compounds **2a** and **3a**.

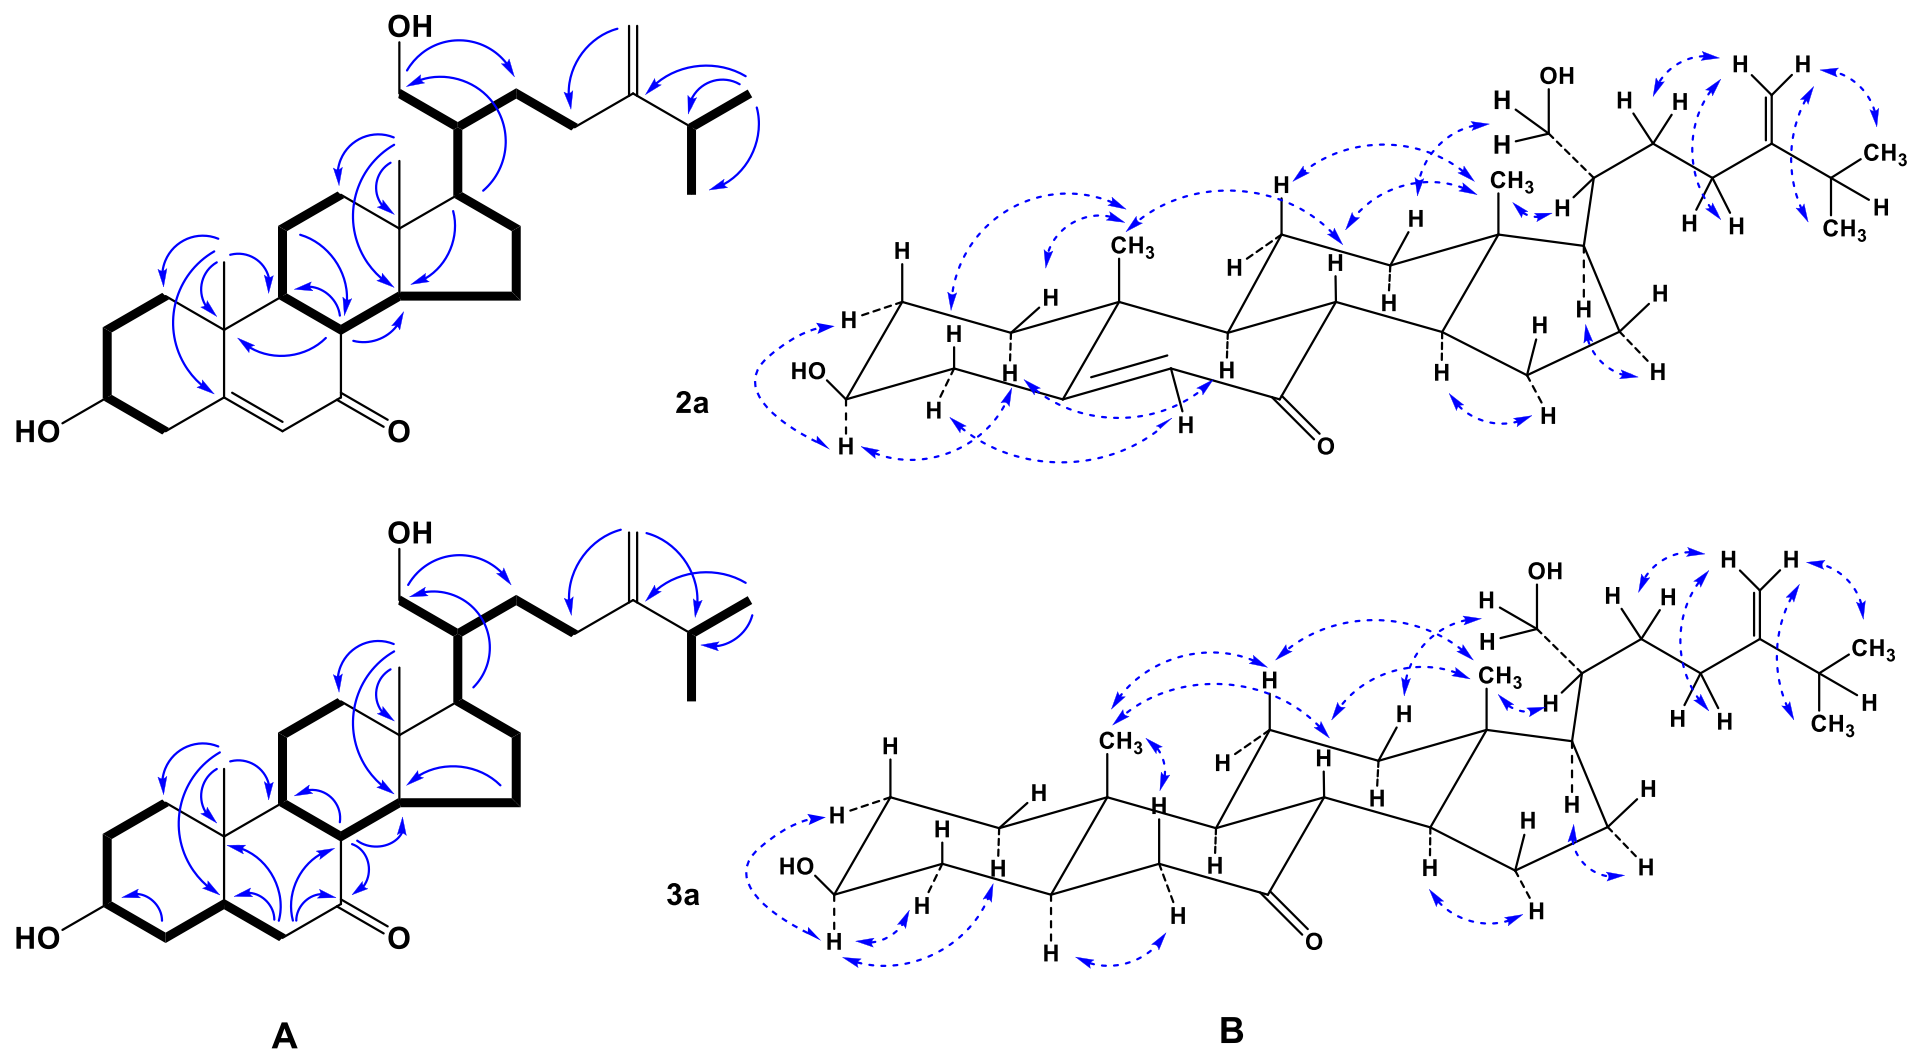

**Figure S18.**  $^1\text{H}$  NMR (700.13 MHz,  $\text{CD}_3\text{OD}$ ) spectrum of compound **2a**.

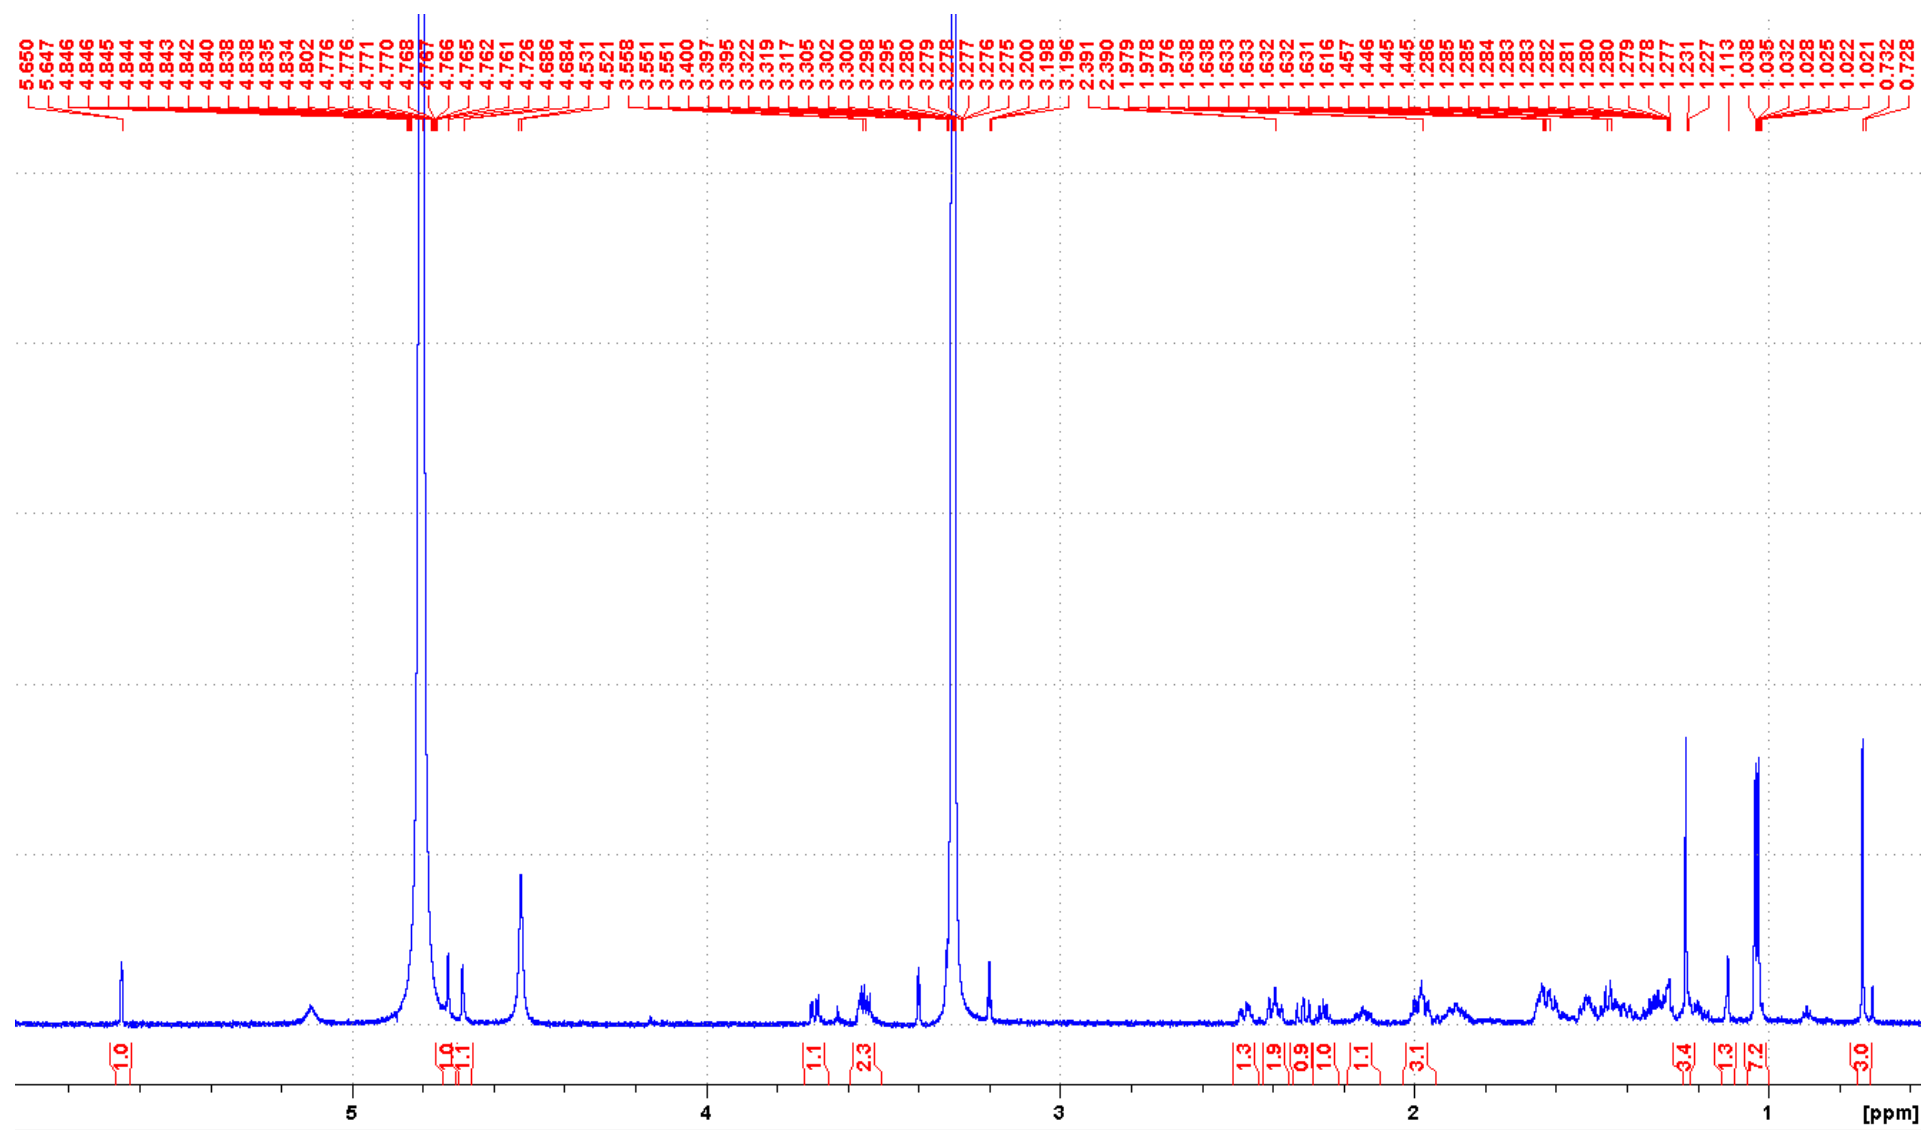

**Figure S19.**  $^{13}\text{C}$  NMR (176.04 MHz,  $\text{CD}_3\text{OD}$ ) spectrum of compound **2a**.

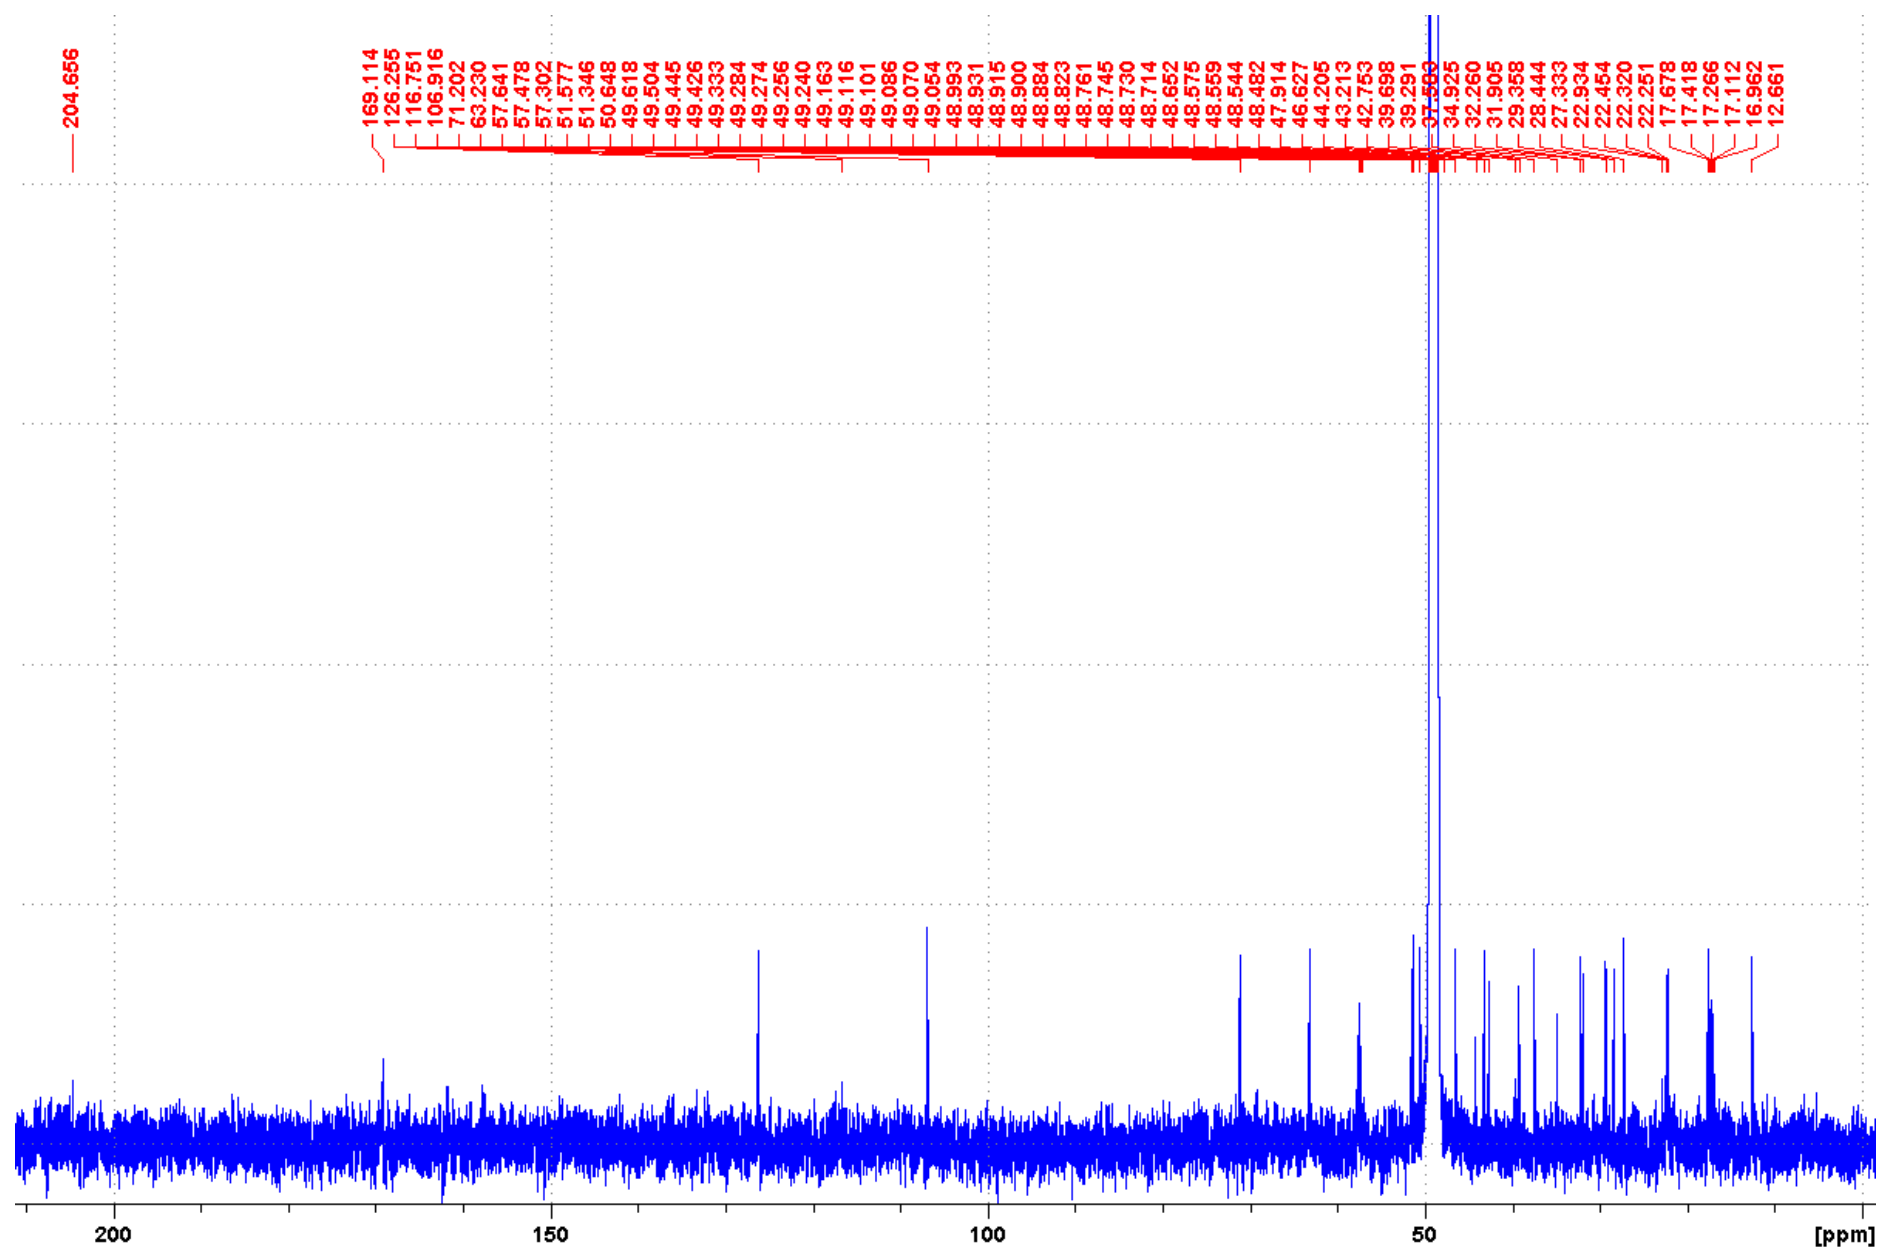

**Figure S20.** COSY (700.13 MHz, CD<sub>3</sub>OD) spectrum of compound **2a**.

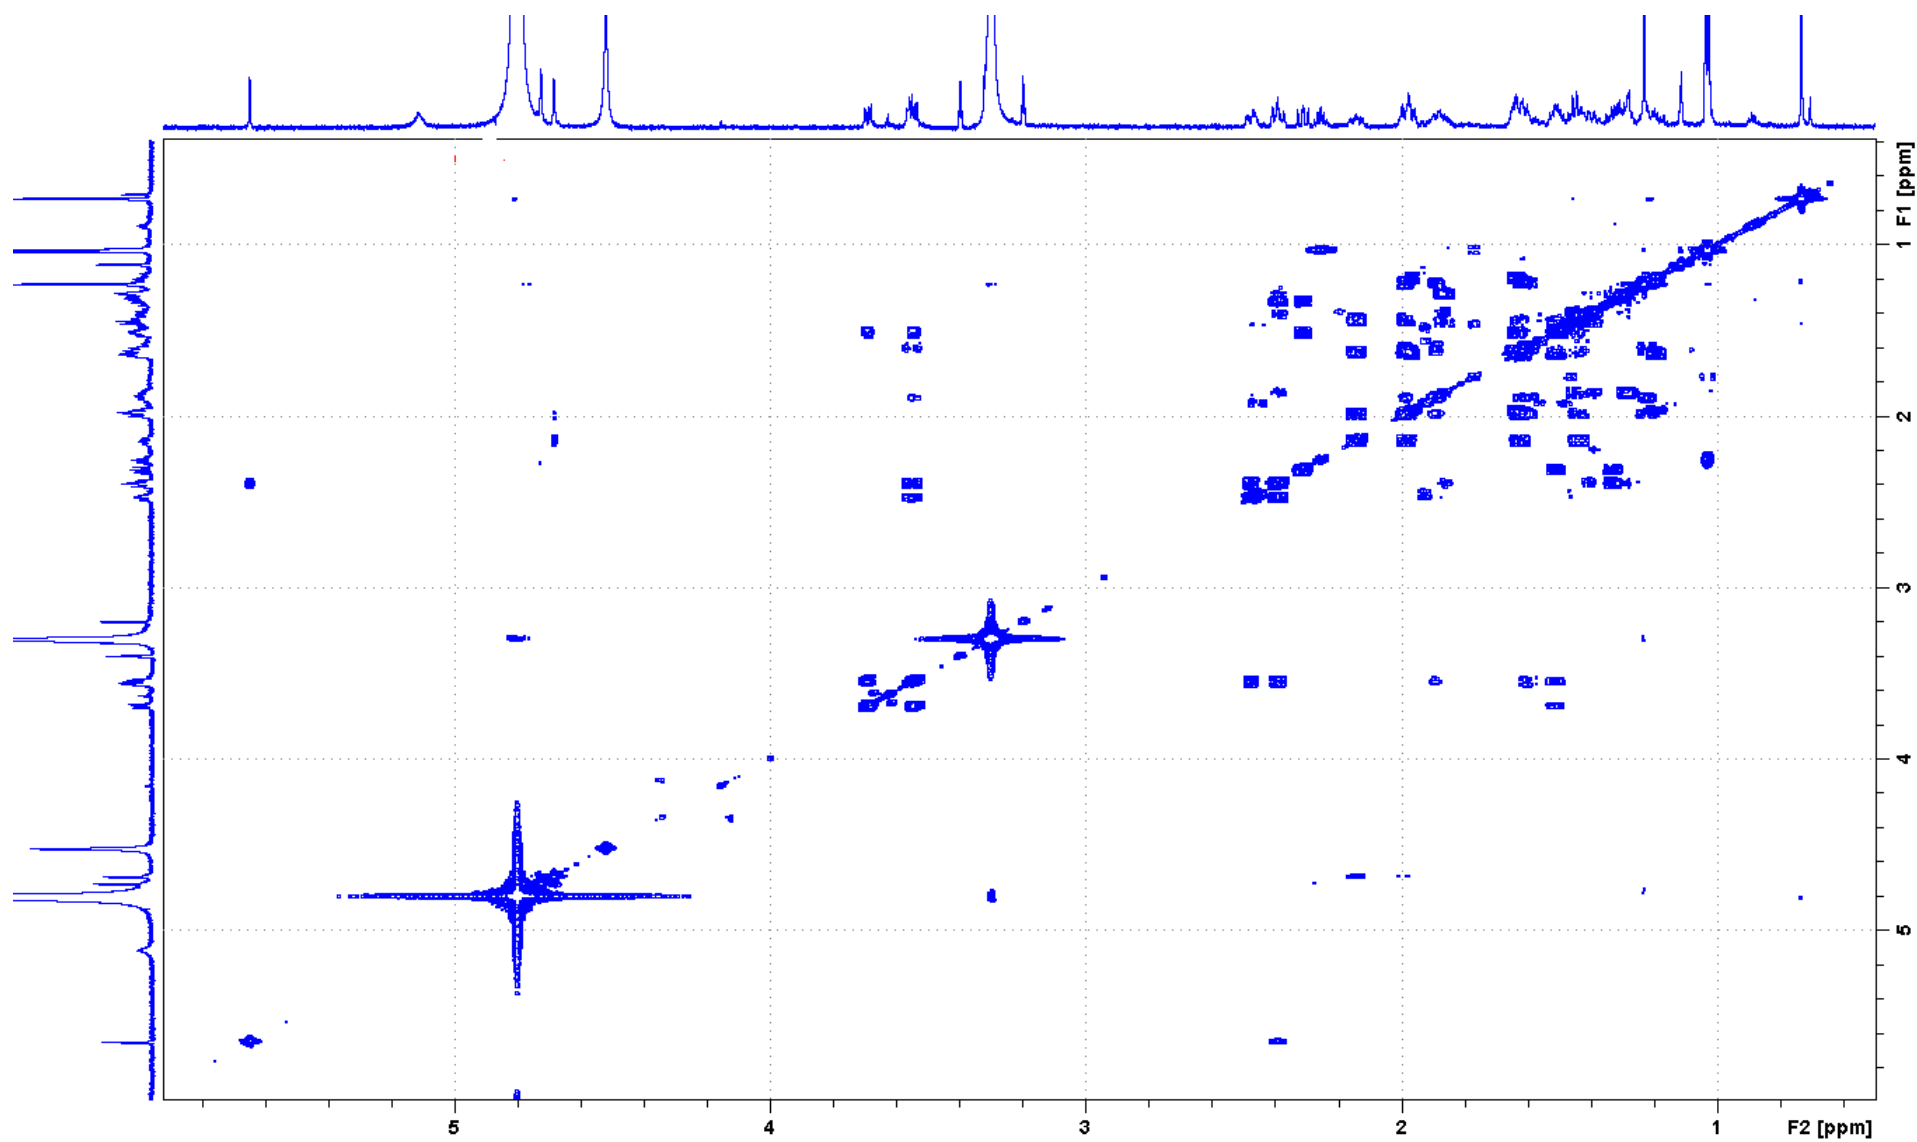

**Figure S21.** HSQC (700.13 MHz, CD<sub>3</sub>OD) spectrum of compound **2a**.

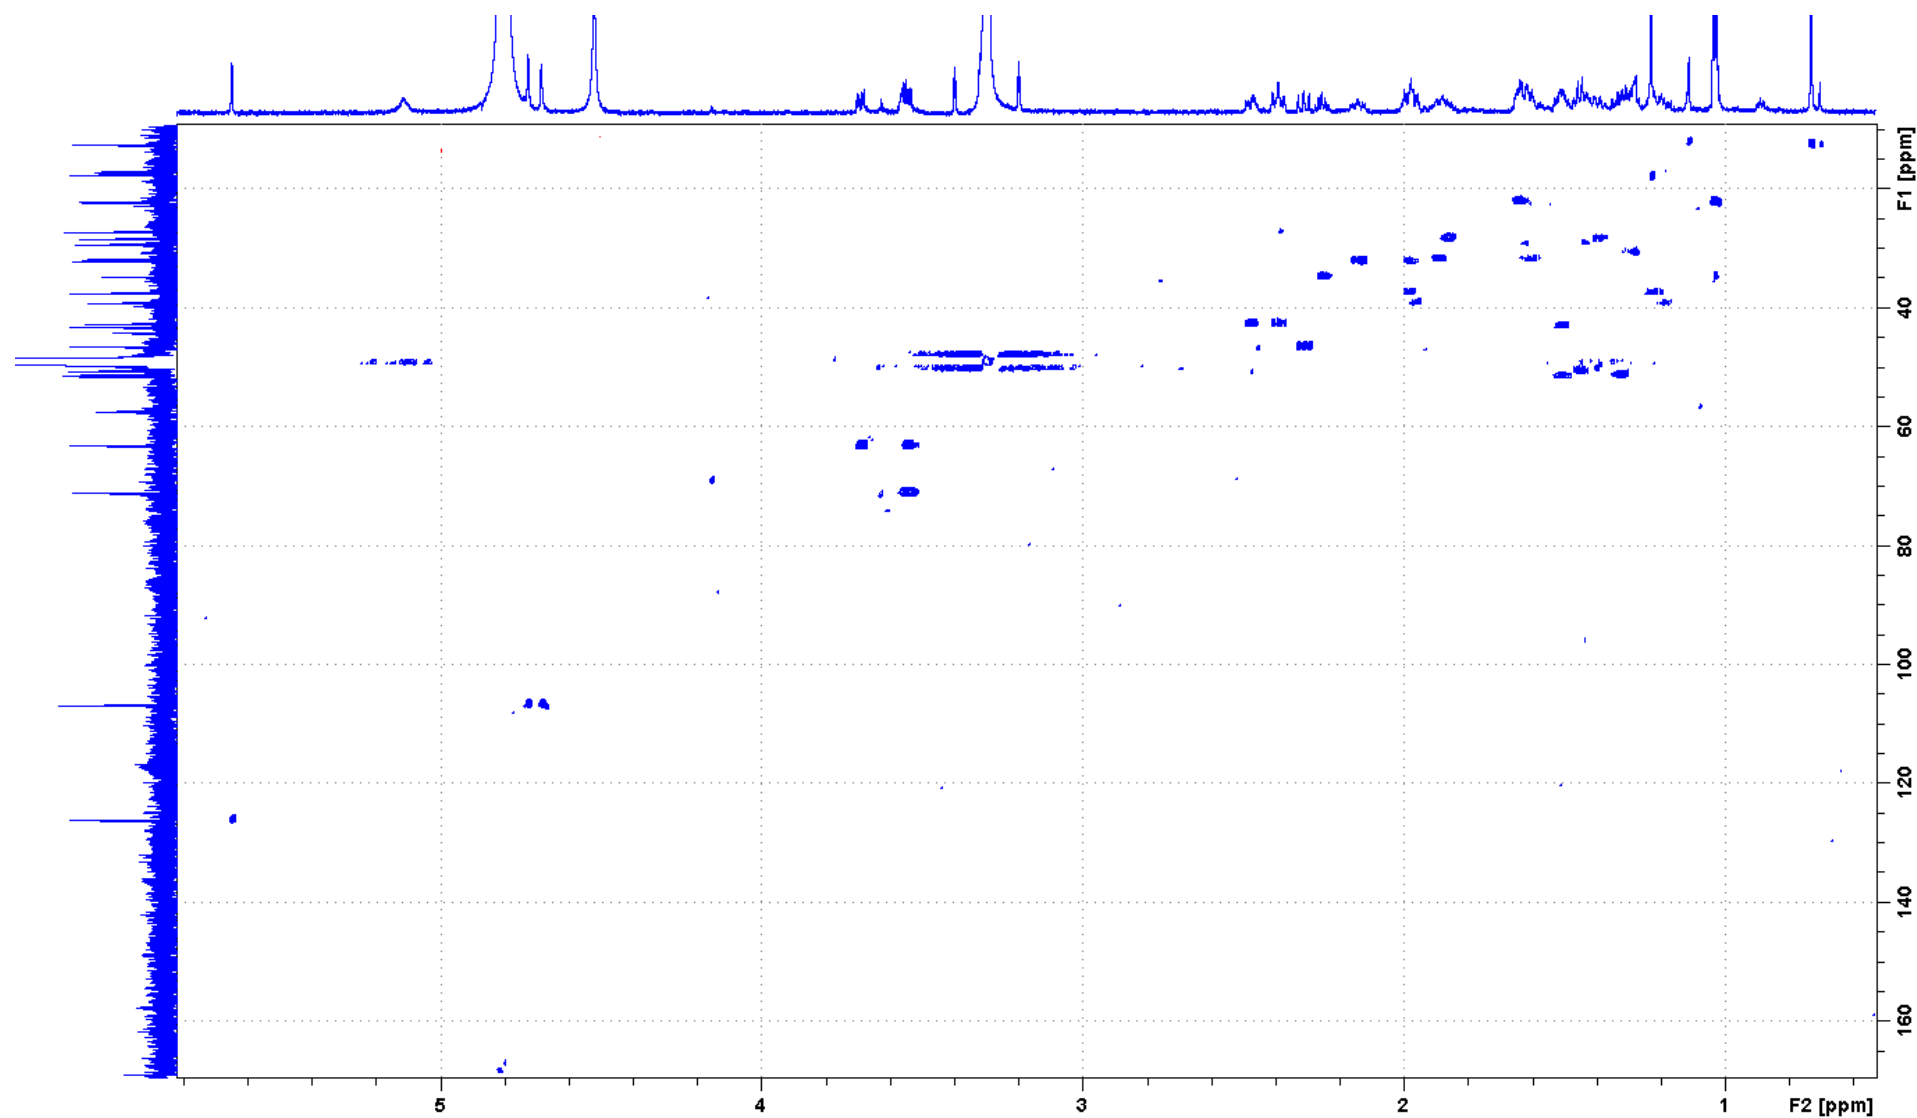



**Figure S22.** HMBC (700.13 MHz, CD<sub>3</sub>OD) spectrum of compound **2a**.

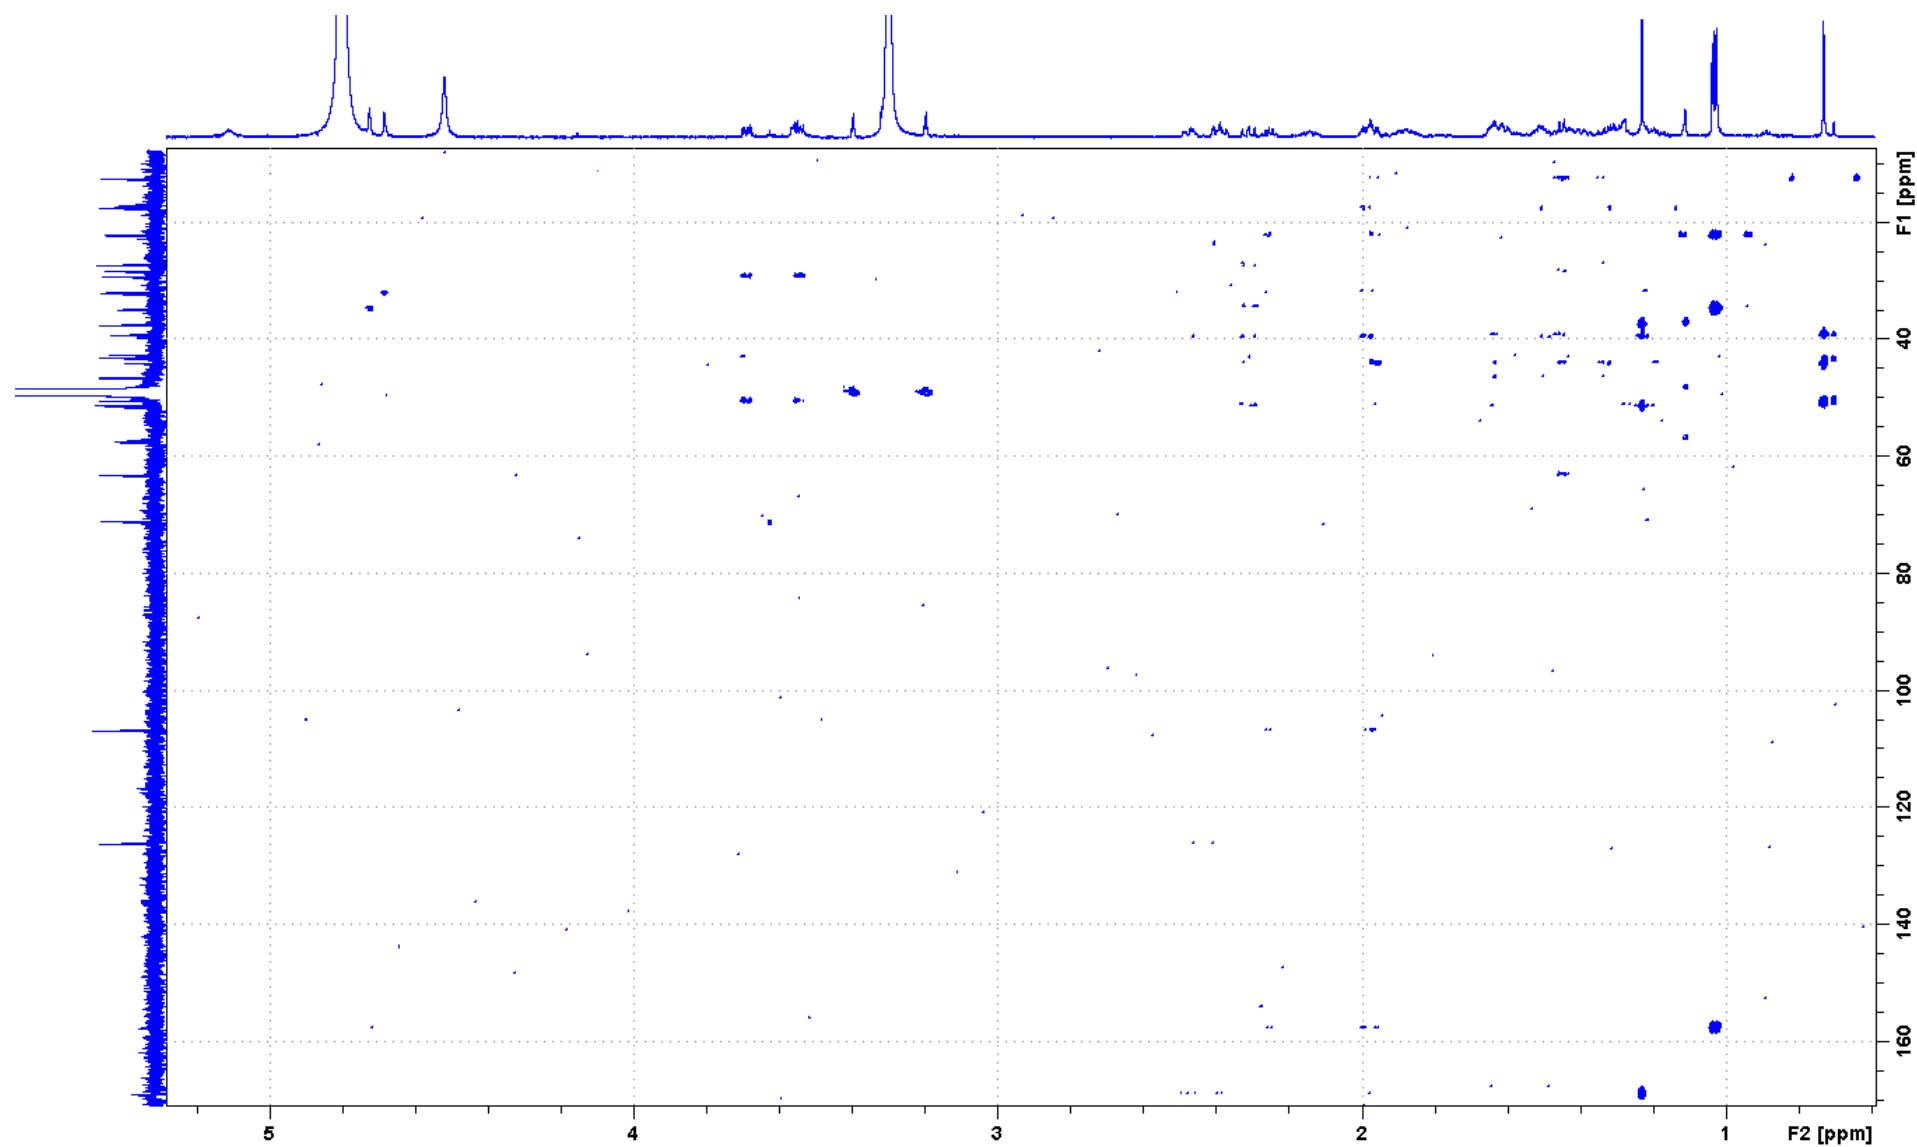

**Figure S23.** ROESY (700.13 MHz, CD<sub>3</sub>OD) spectrum of compound **2a**.

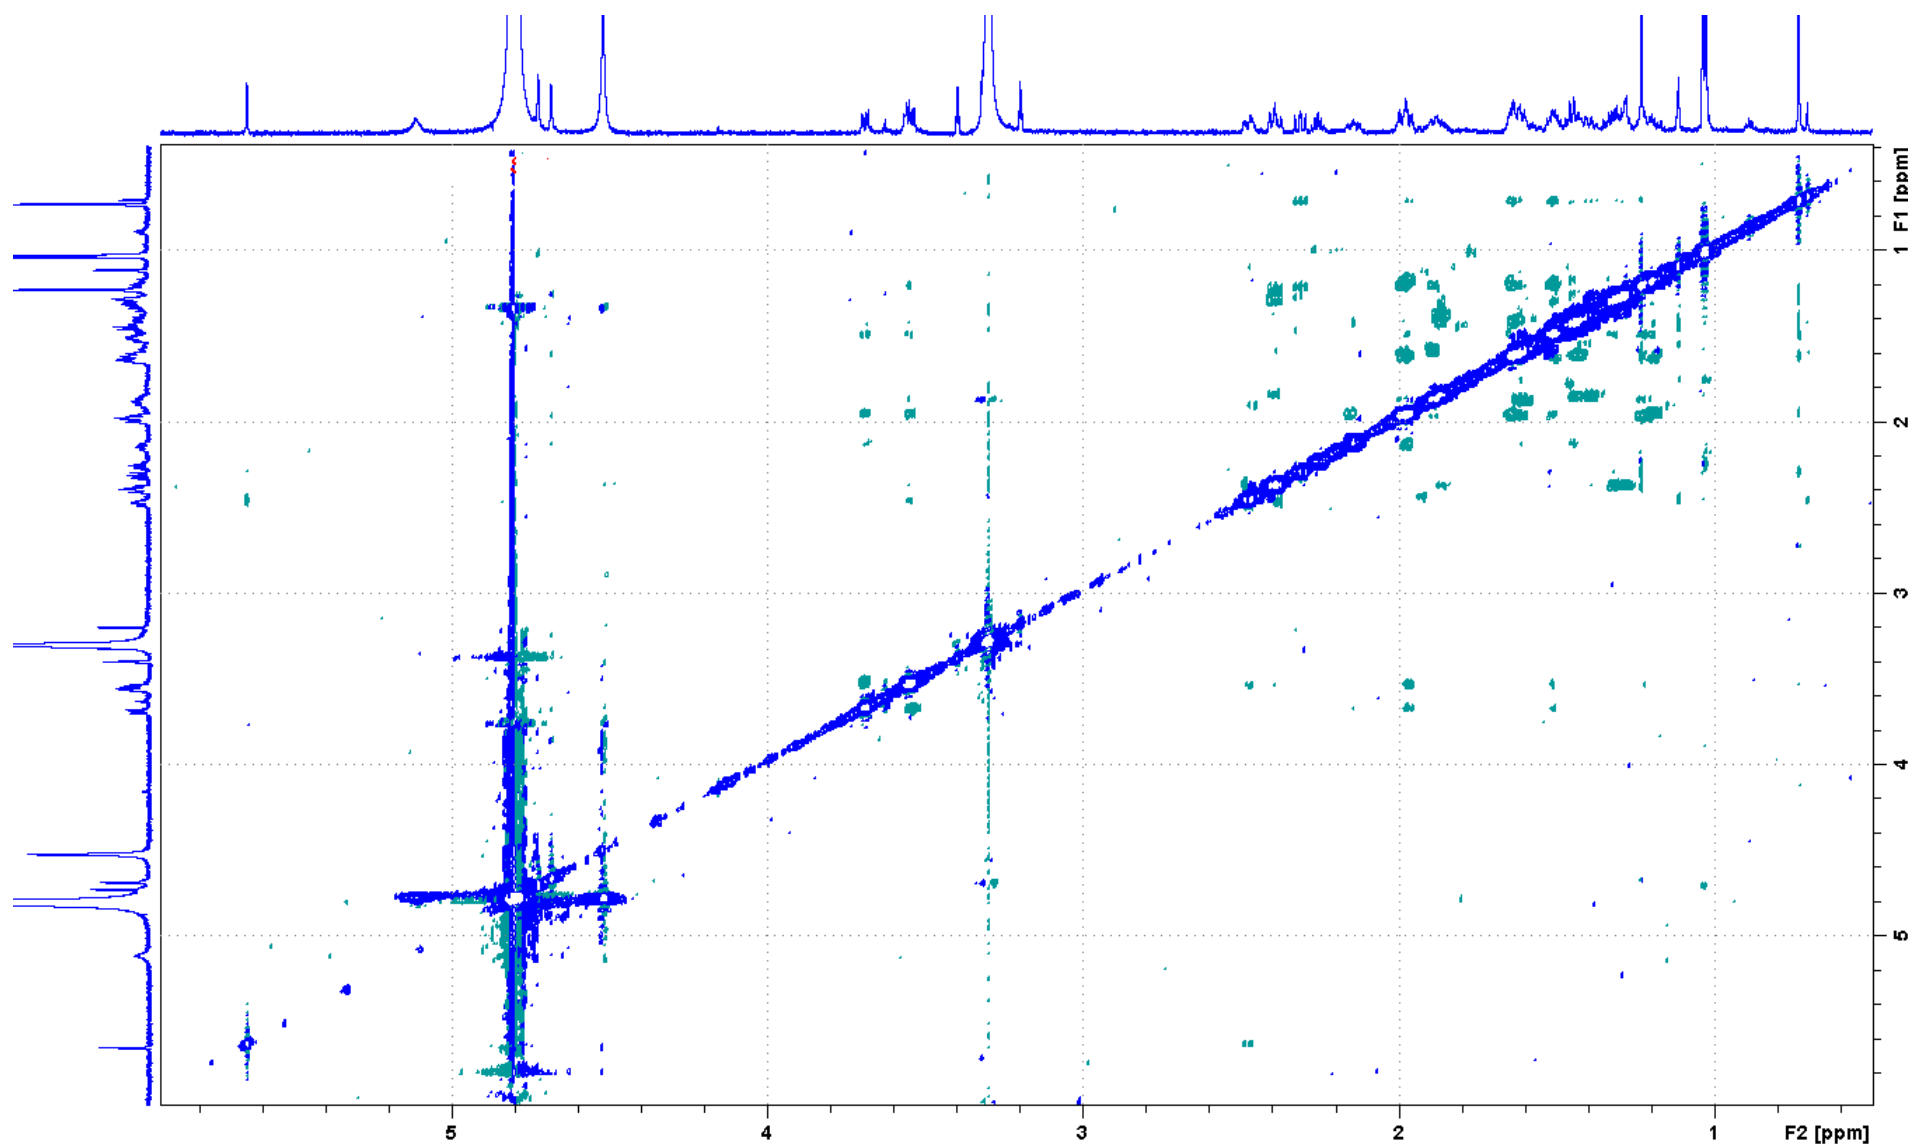

**Figure S24.**  $^1\text{H}$  NMR (700.13 MHz,  $\text{CD}_3\text{OD}$ ) spectrum of compound **3a**.

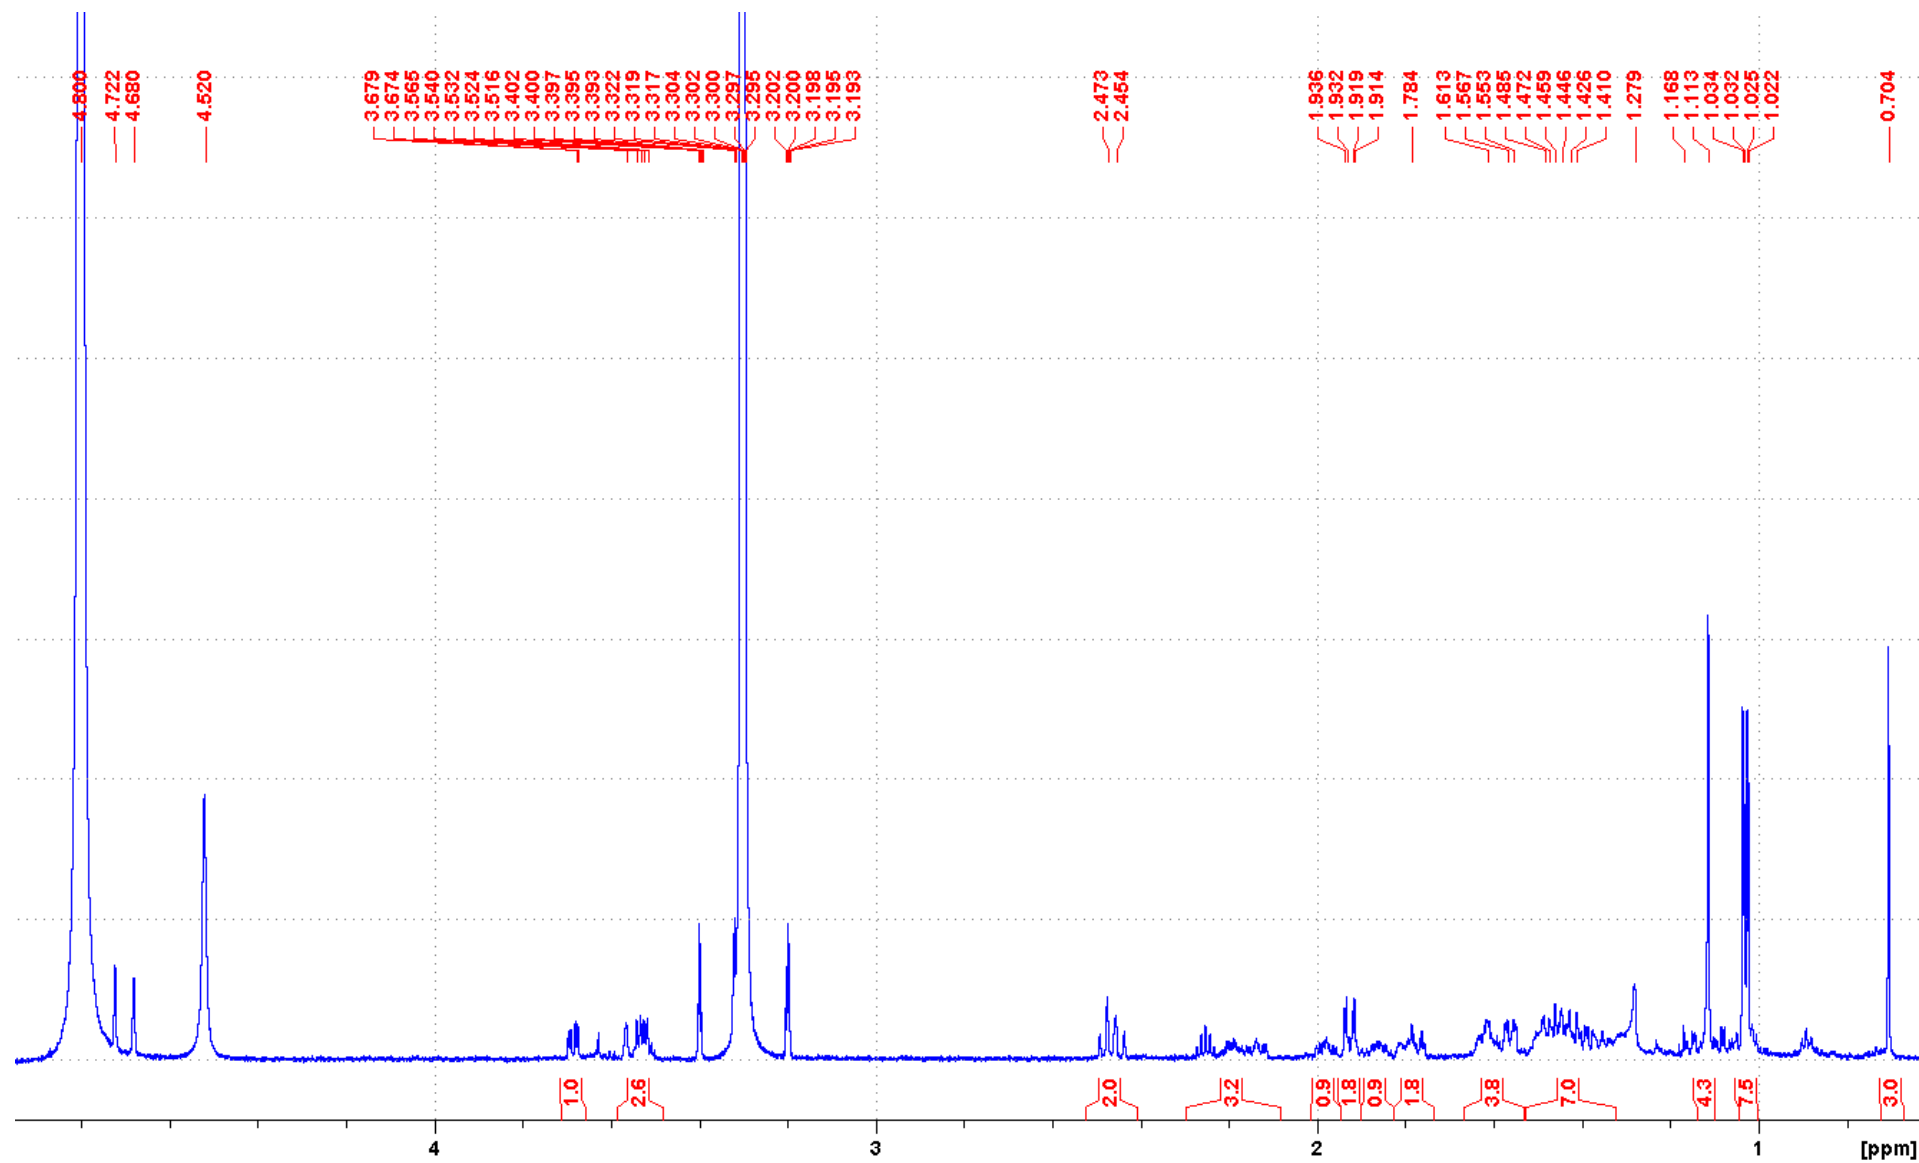

**Figure S25.**  $^{13}\text{C}$  NMR (176.04 MHz,  $\text{CD}_3\text{OD}$ ) spectrum of compound **3a**.

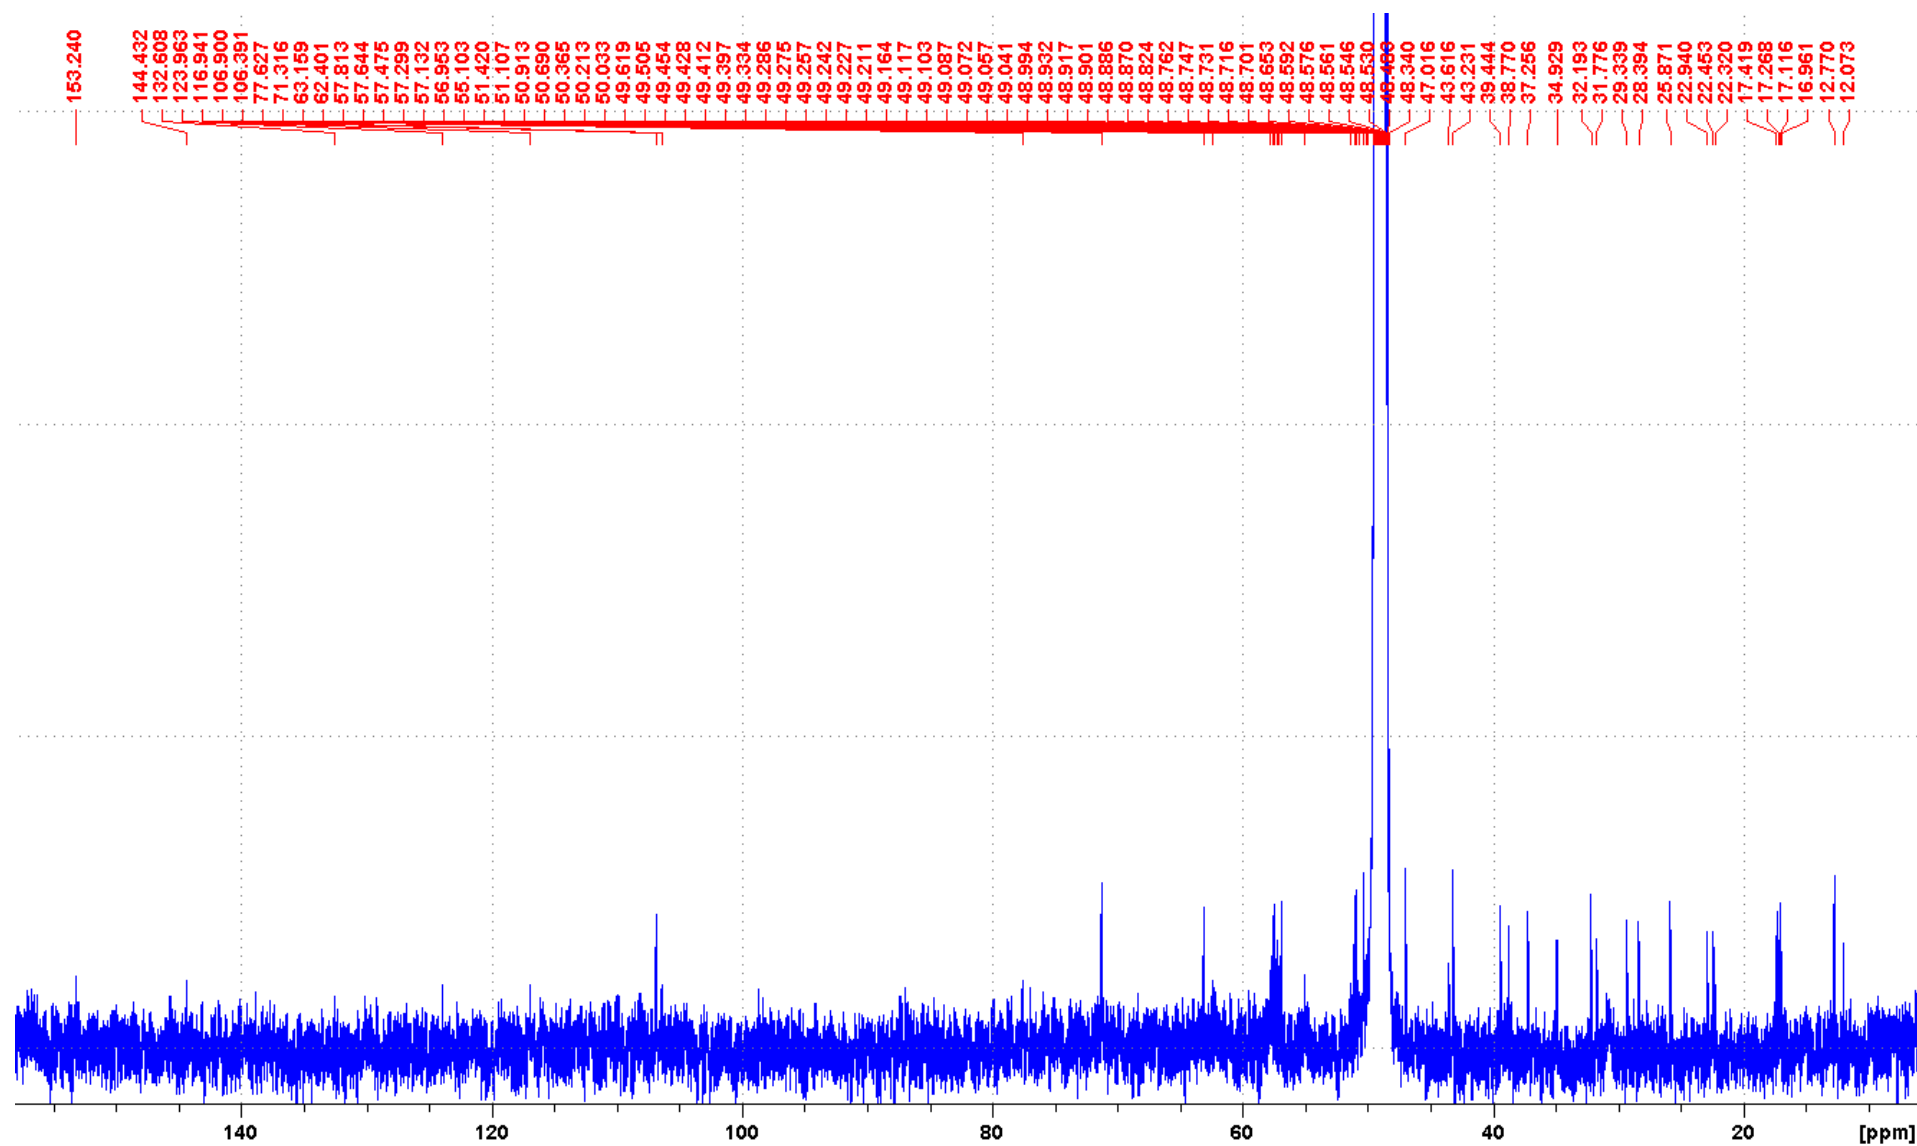

**Figure S26.** COSY (700.13 MHz, CD<sub>3</sub>OD) spectrum of compound **3a**.

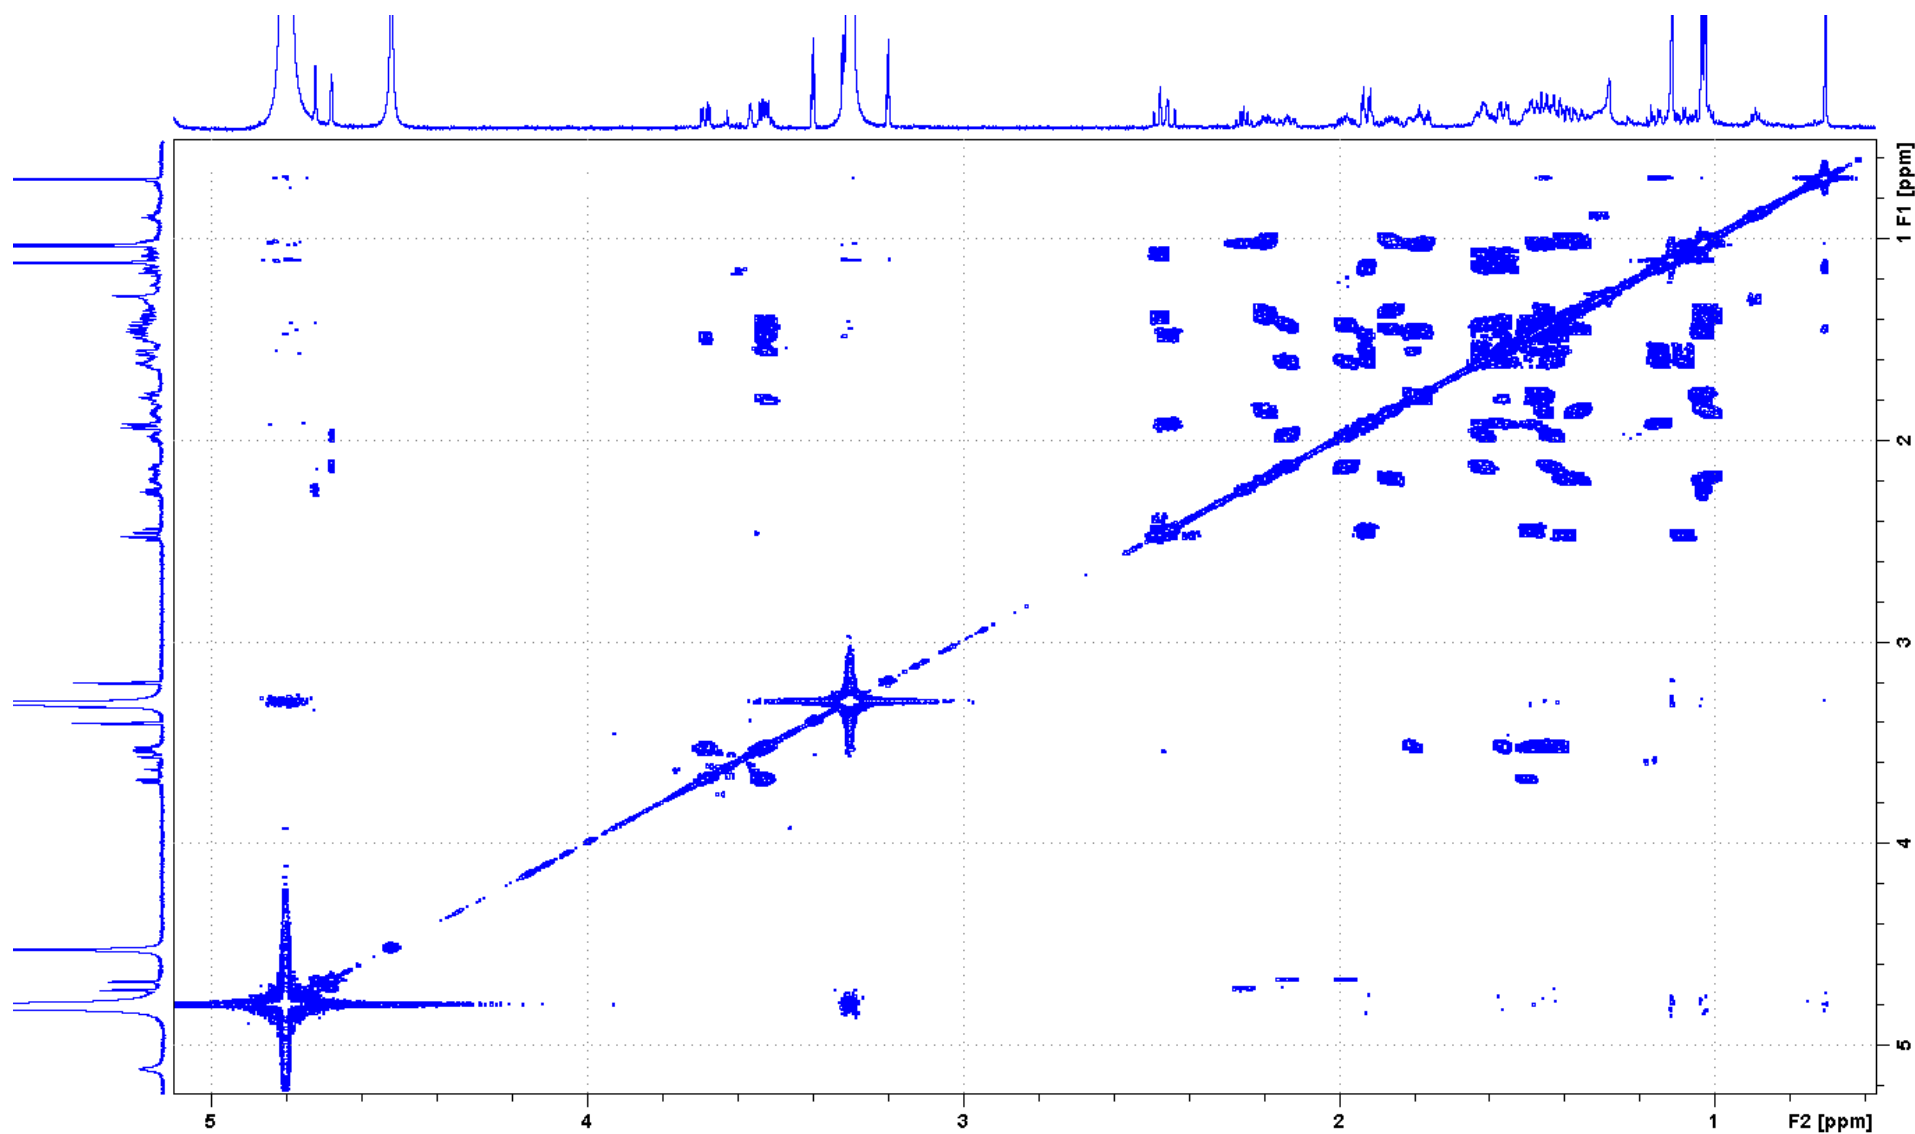

**Figure S27.** HSQC (700.13 MHz, CD<sub>3</sub>OD) spectrum of compound **3a**.

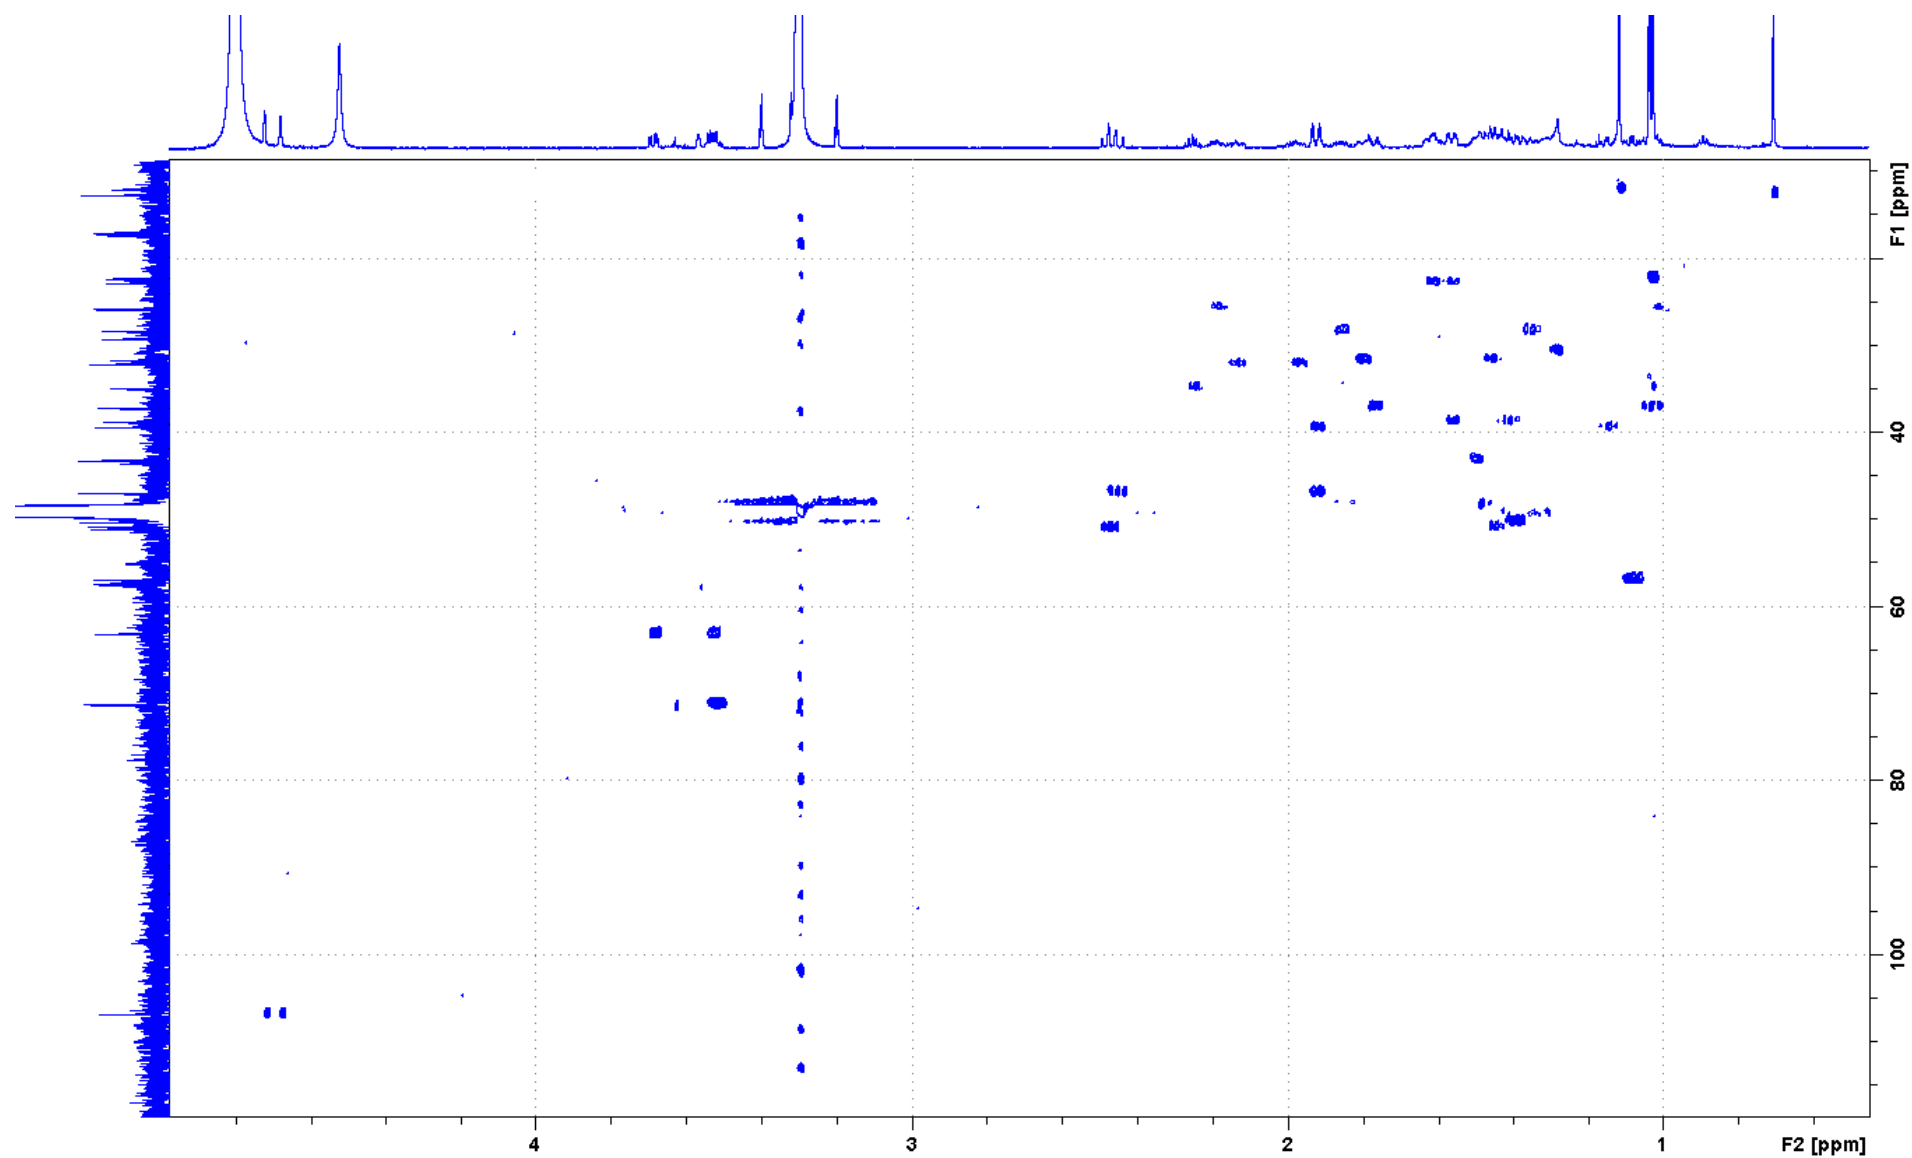

**Figure S28.** HMBC (700.13 MHz, CD<sub>3</sub>OD) spectrum of compound **3a**.

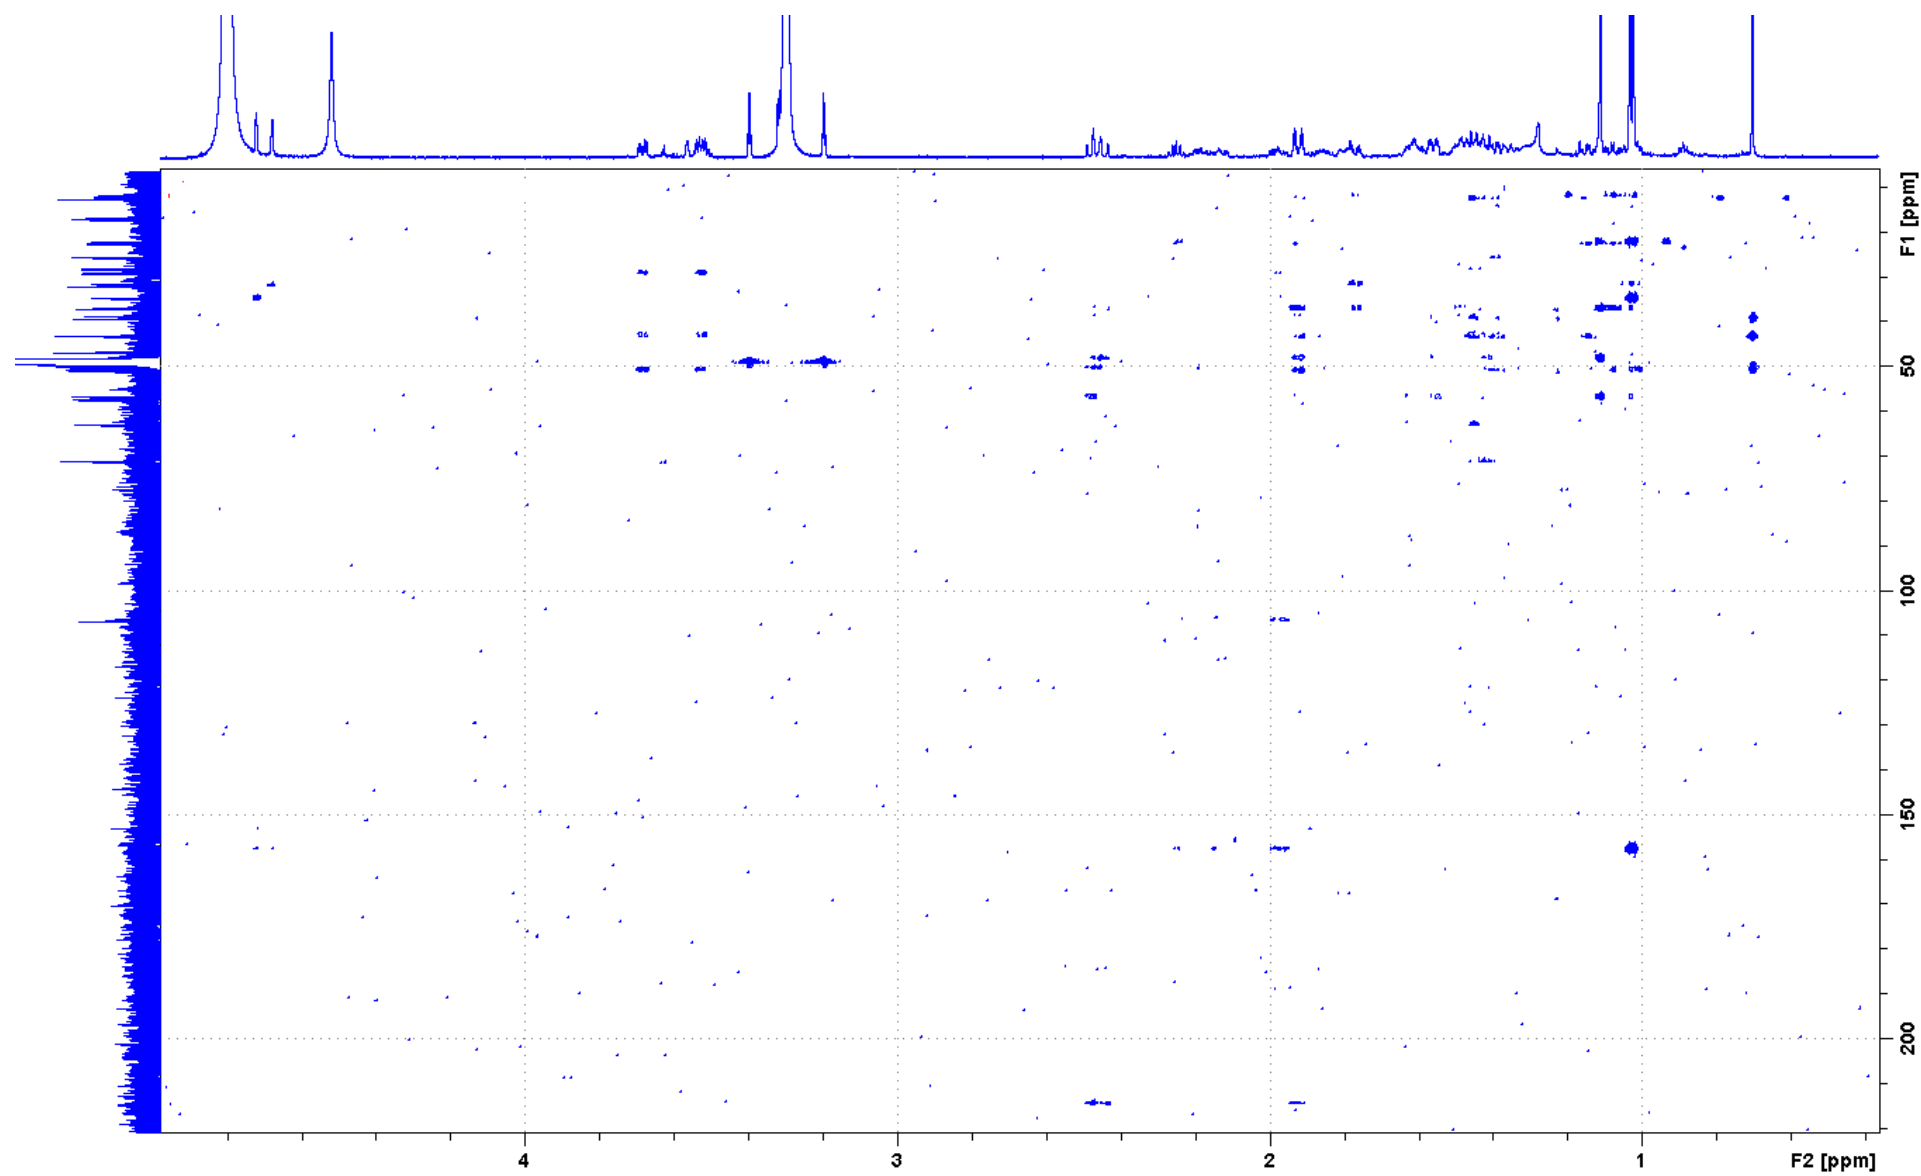

**Figure S29.** ROESY (700.13 MHz, CD<sub>3</sub>OD) spectrum of compound **3a**.

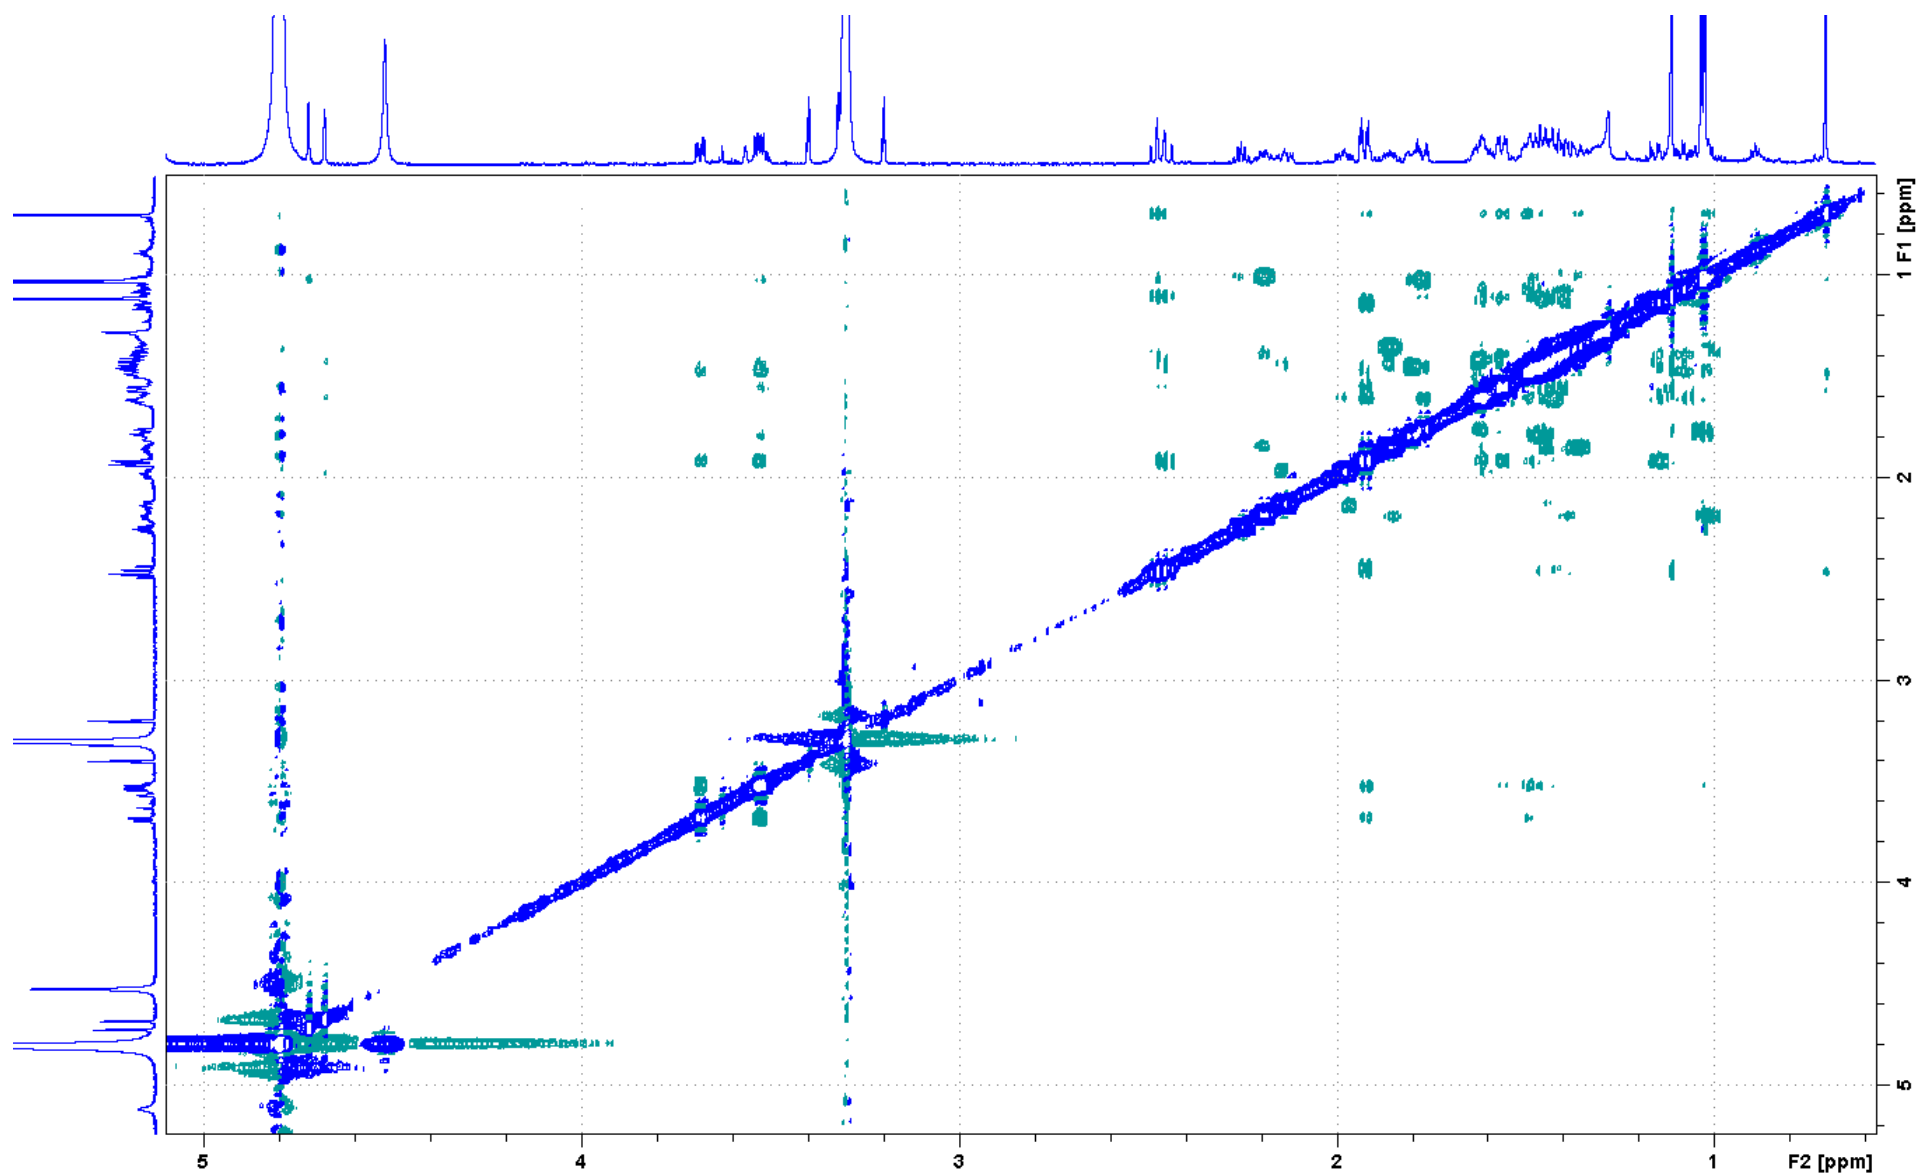



**Figure S30.** HRESIMS spectra of compound **4**

(-)HRESIMS  $[M - Na]^-$  ion

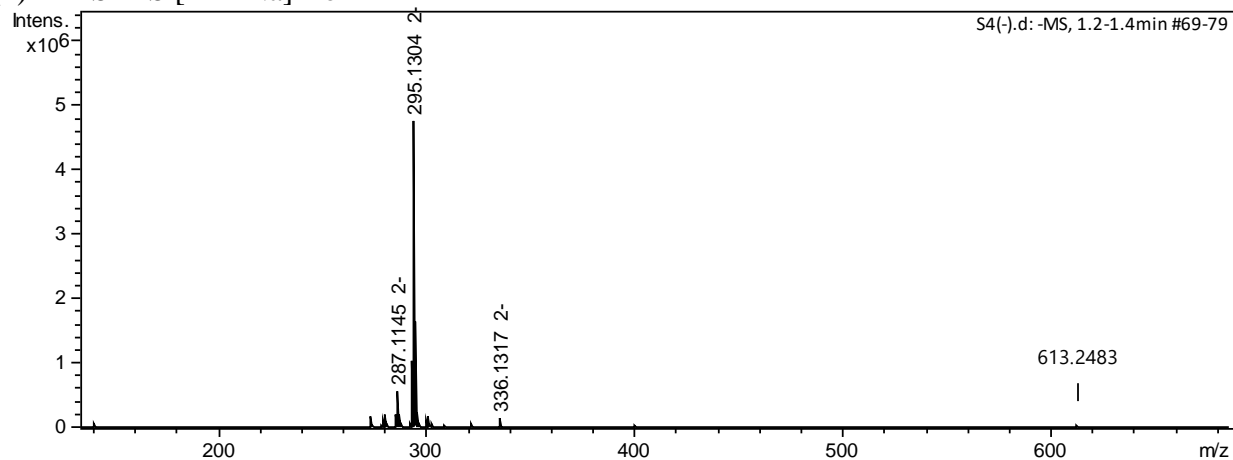

(+)HRESIMS  $[M + Na]^+$  ion

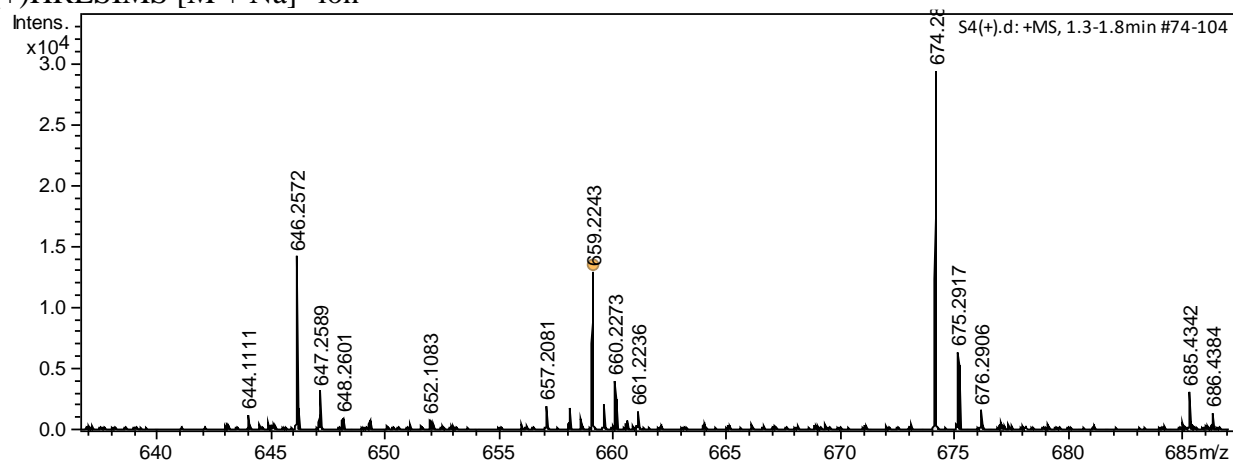

**Figure S31.**  $^1\text{H}$  NMR (700.13 MHz,  $\text{CD}_3\text{OD}$ ) spectrum of compound **4**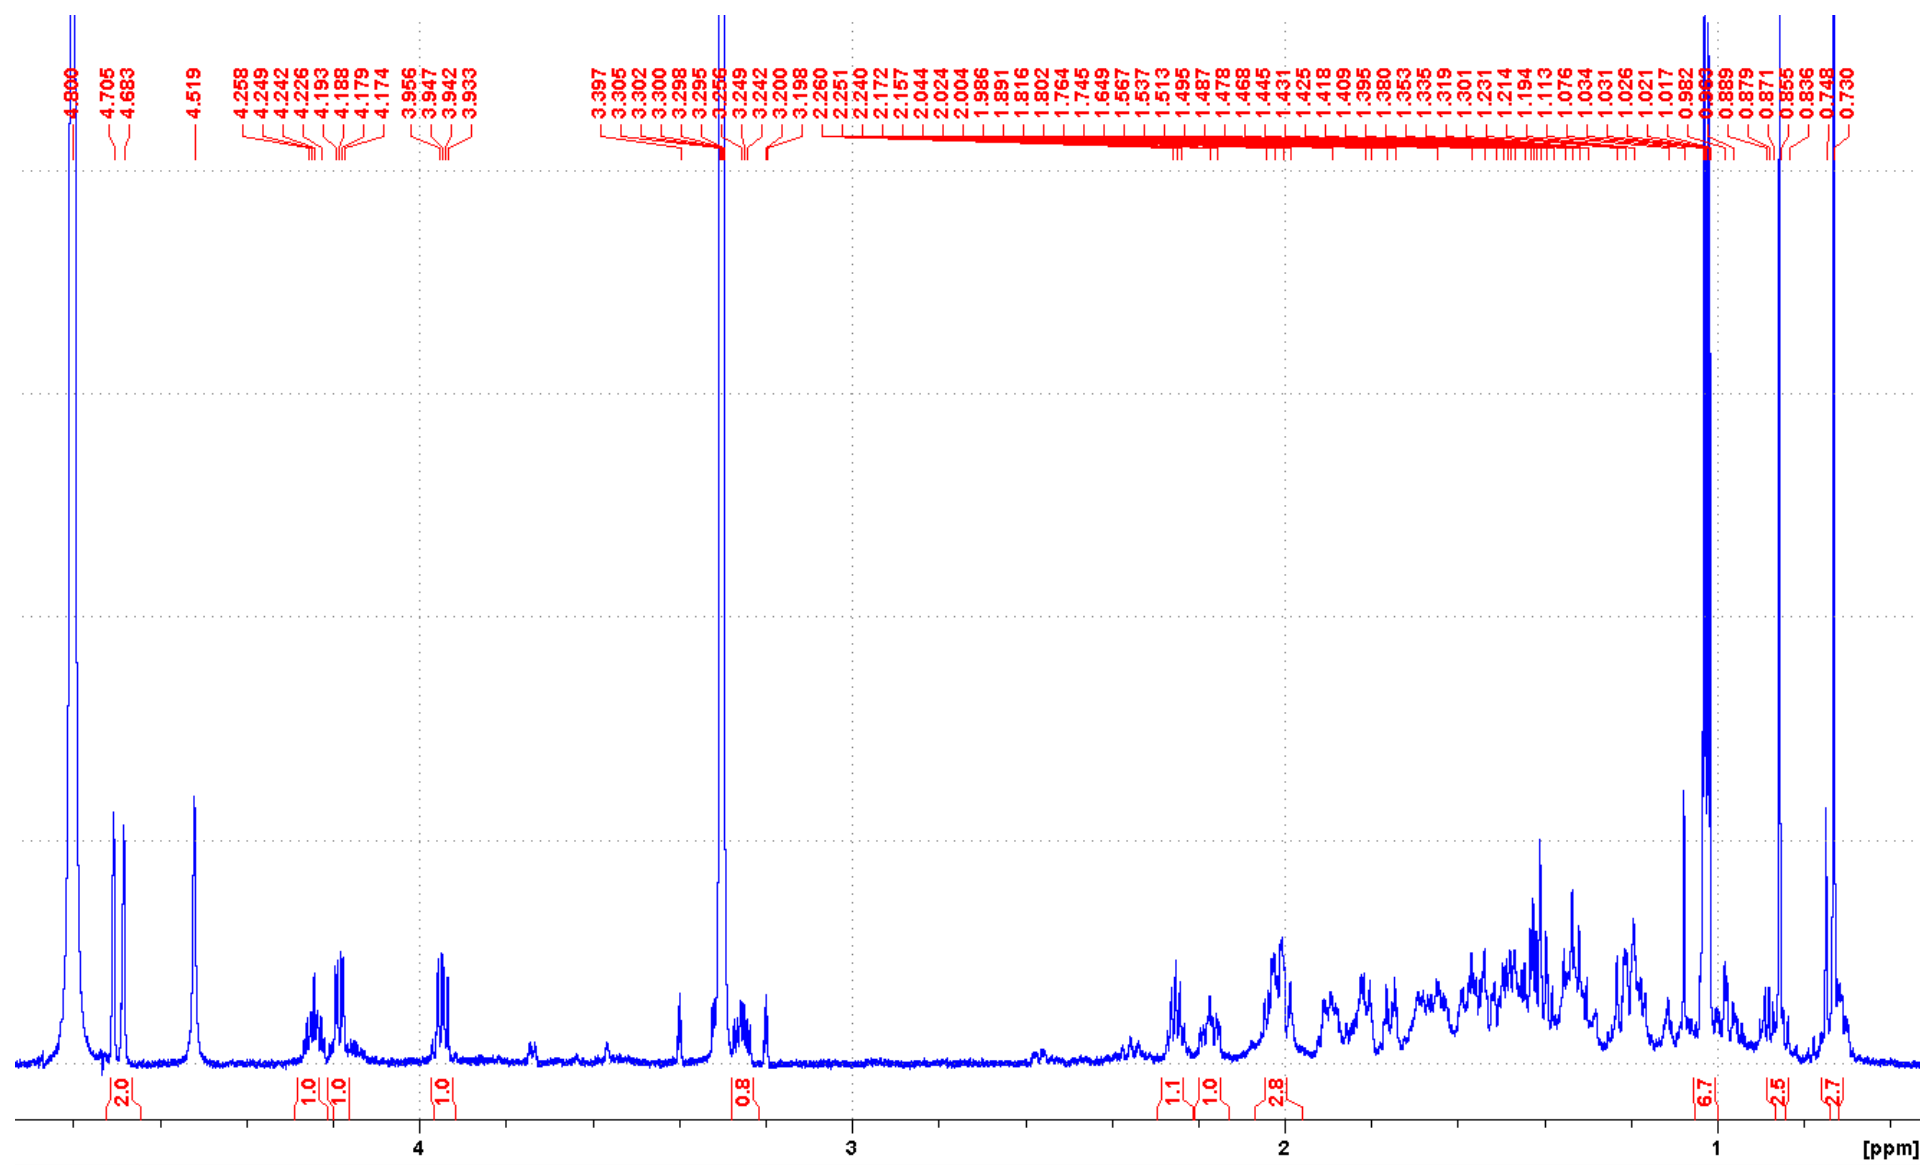

**Figure S32.**  $^{13}\text{C}$  NMR (176.04 MHz,  $\text{CD}_3\text{OD}$ ) spectrum of compound **4**

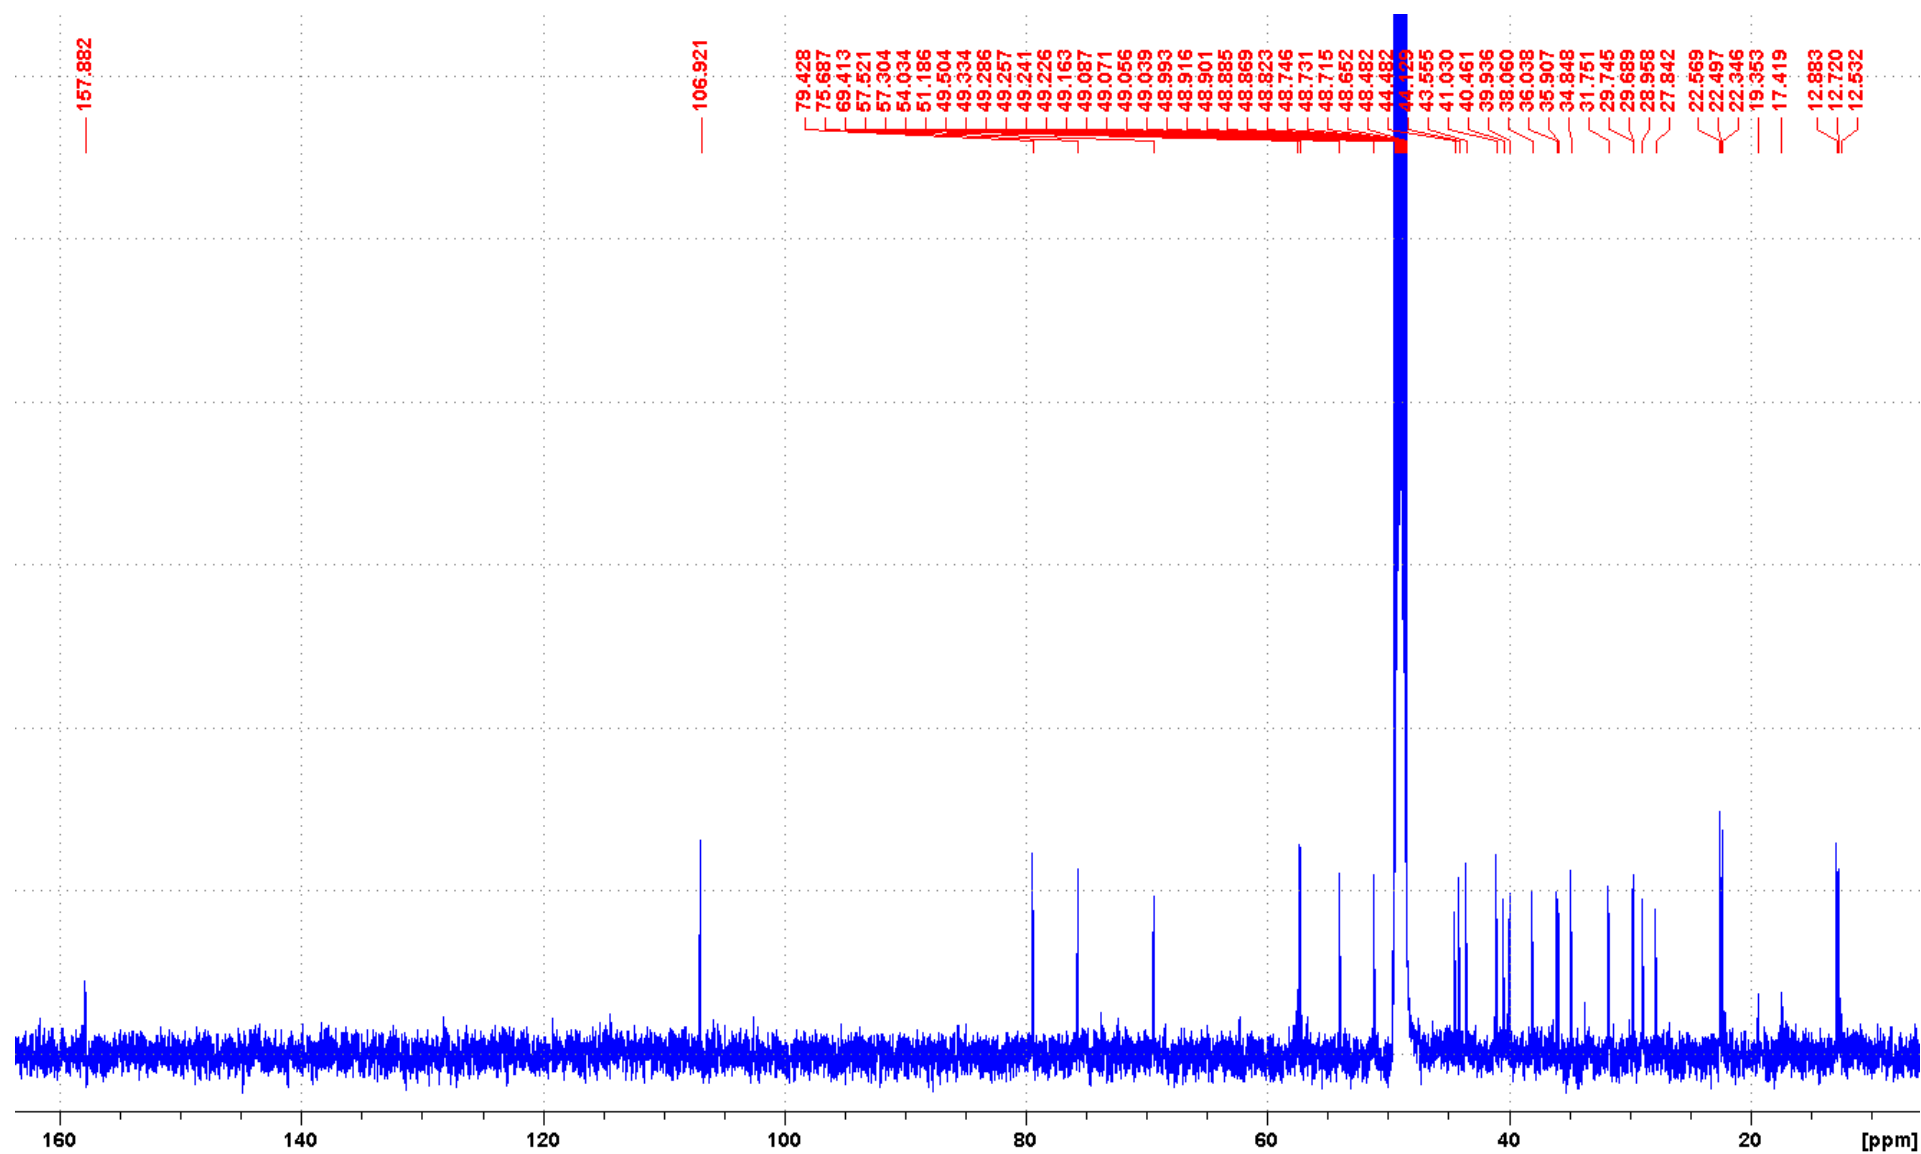

**Figure S33.** COSY (700.13 MHz, CD<sub>3</sub>OD) spectrum of compound **4**

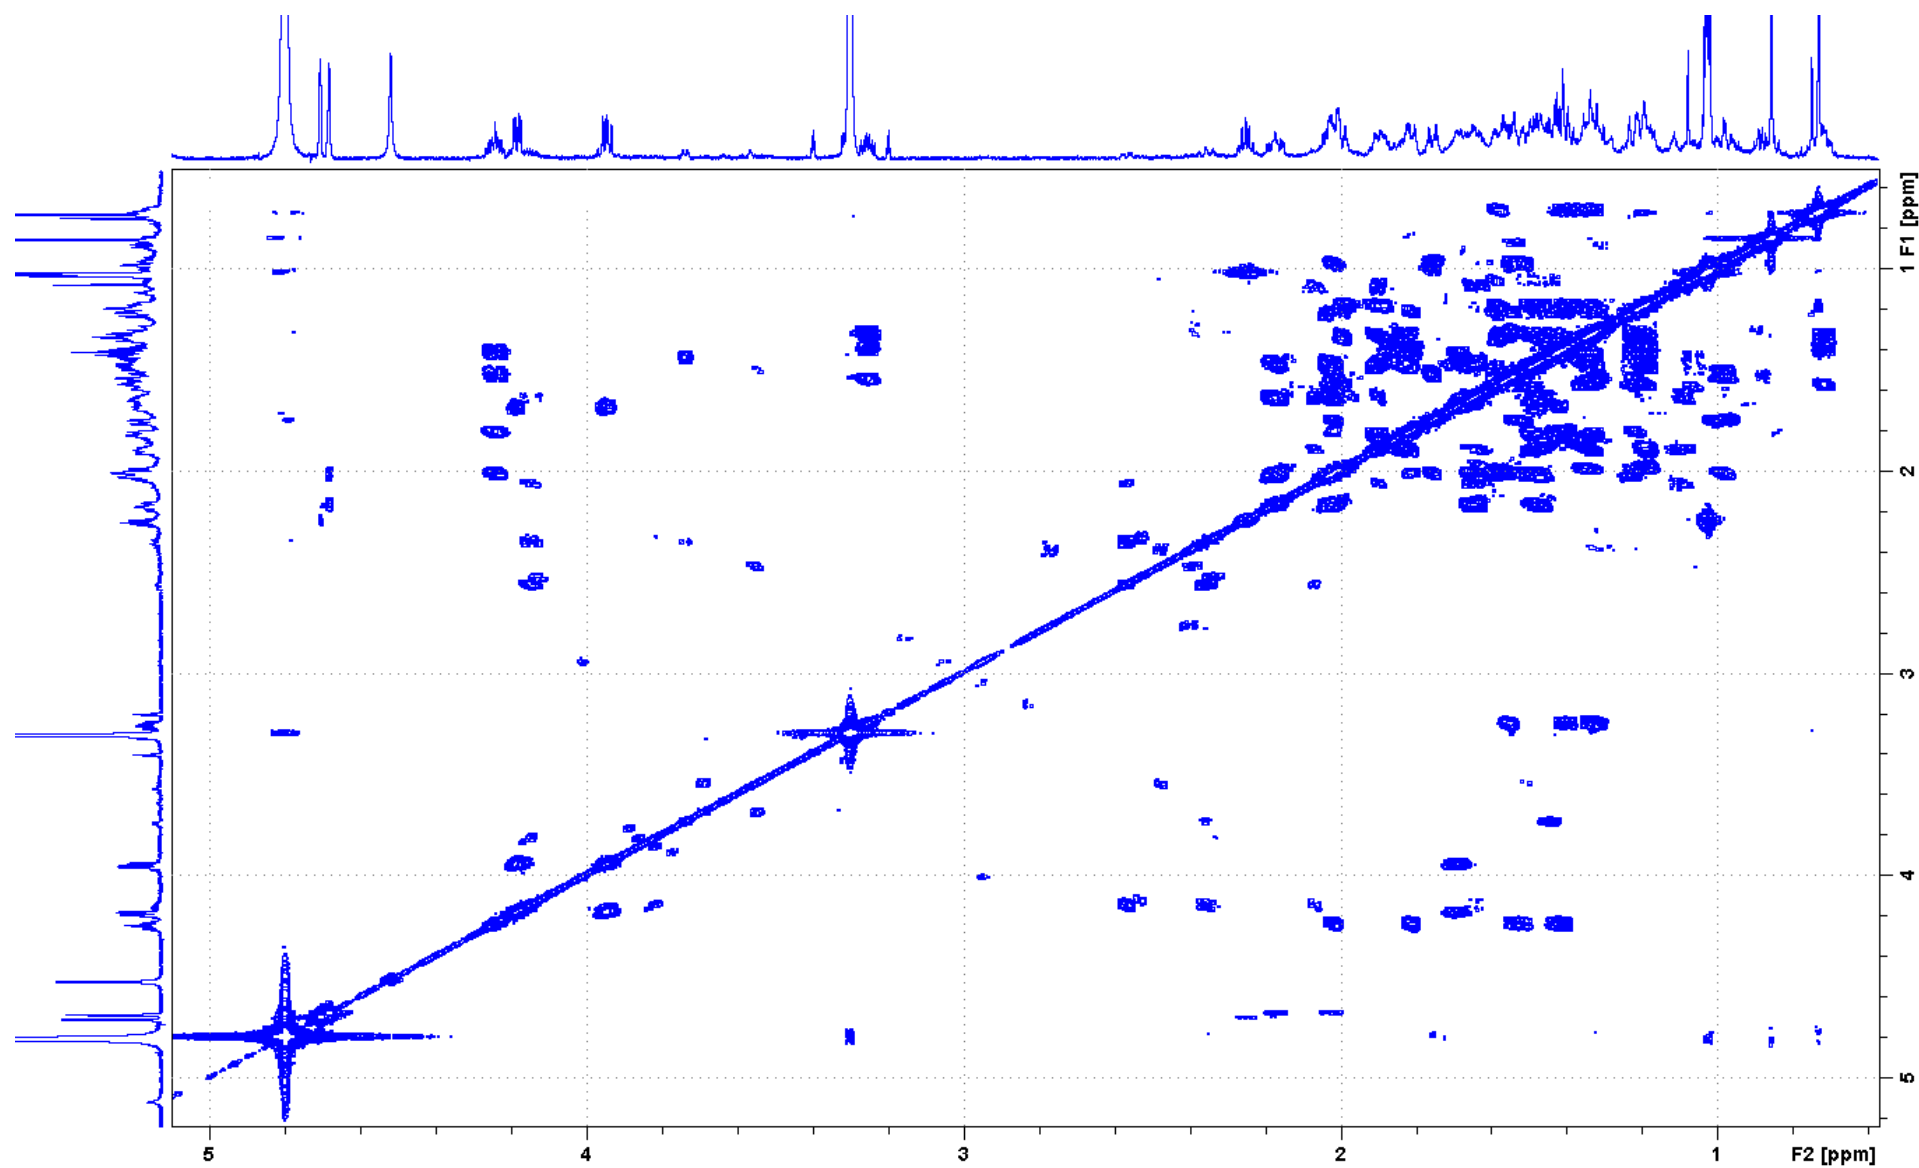

**Figure S34.** HSQC (700.13 MHz, CD<sub>3</sub>OD) spectrum of compound **4**

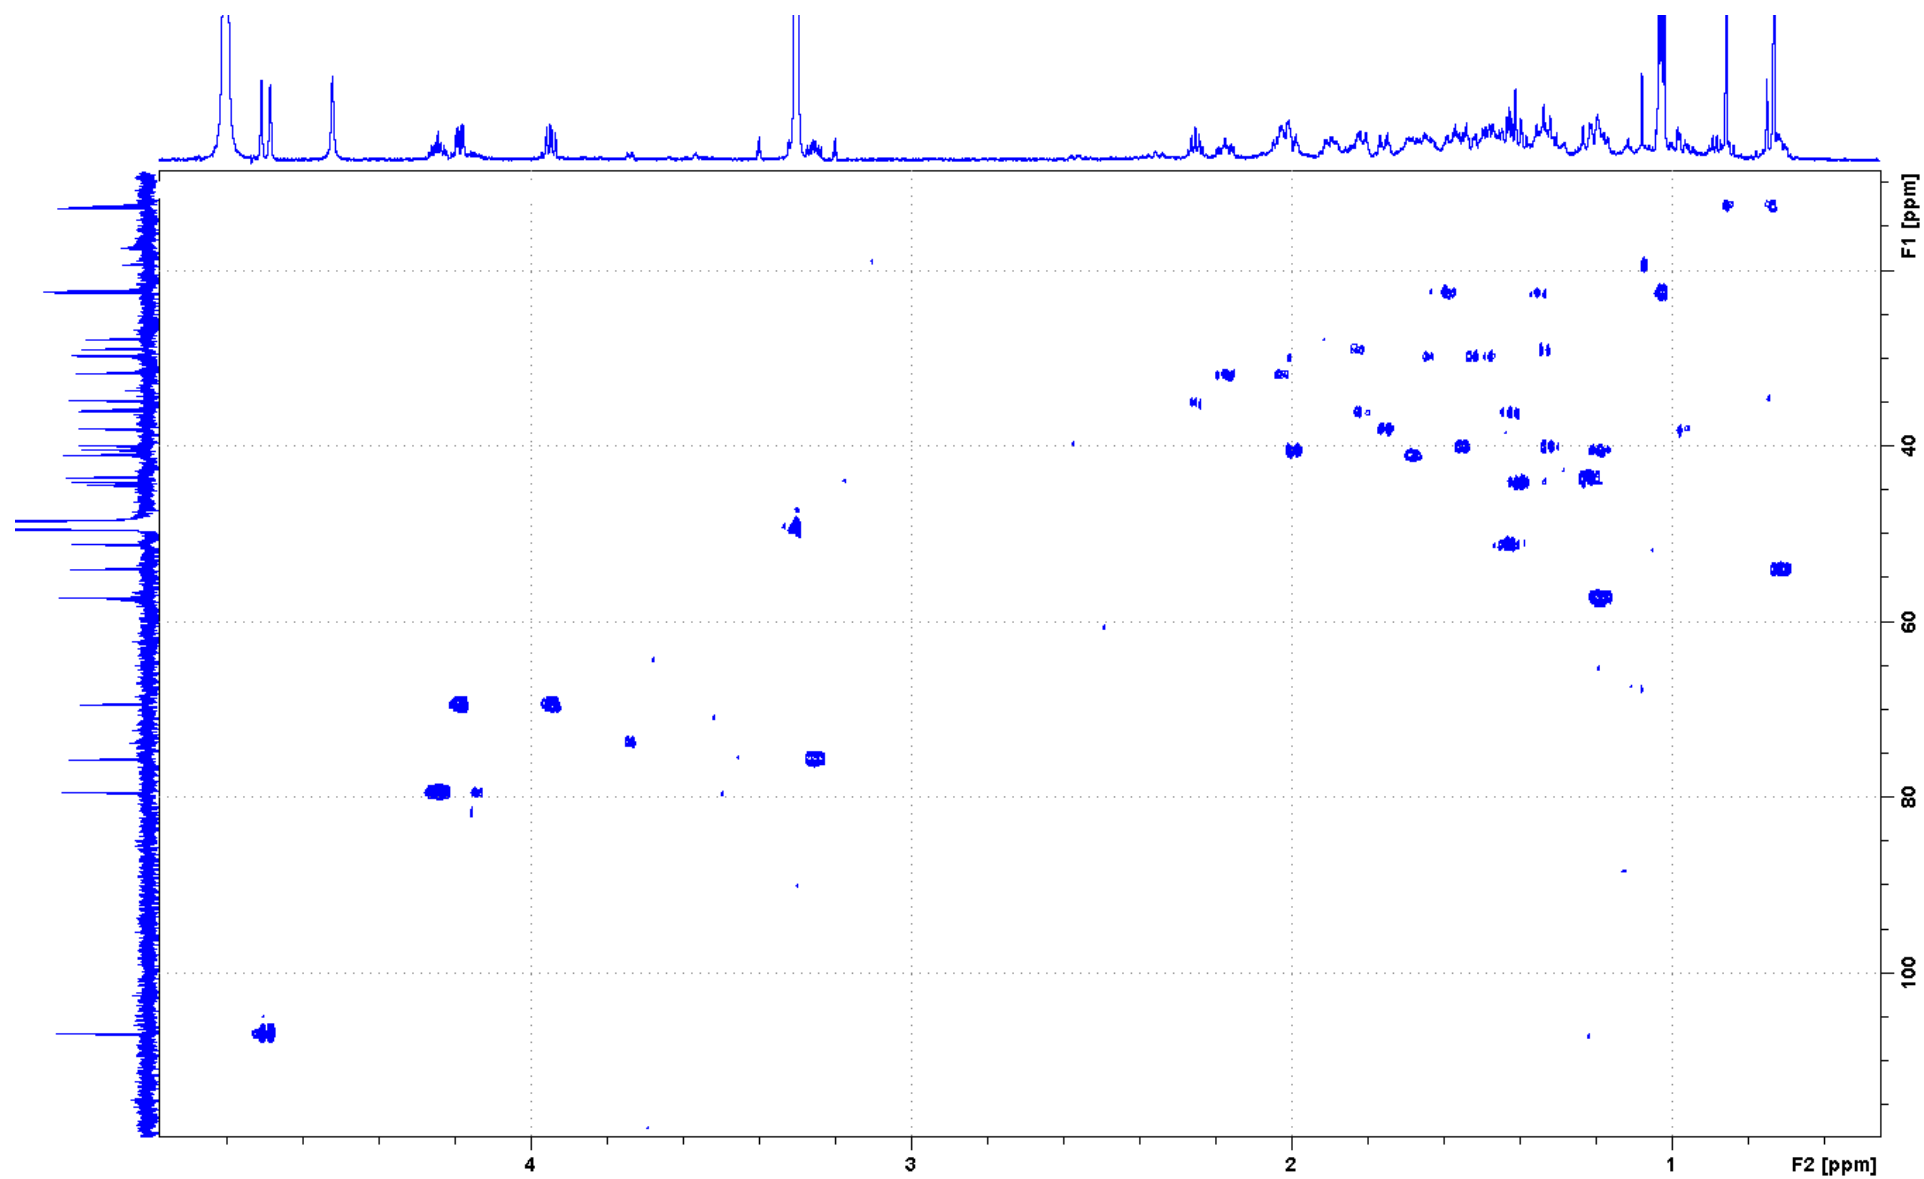

**Figure S35.** HMBC (700.13 MHz, CD<sub>3</sub>OD) spectrum of compound **4**

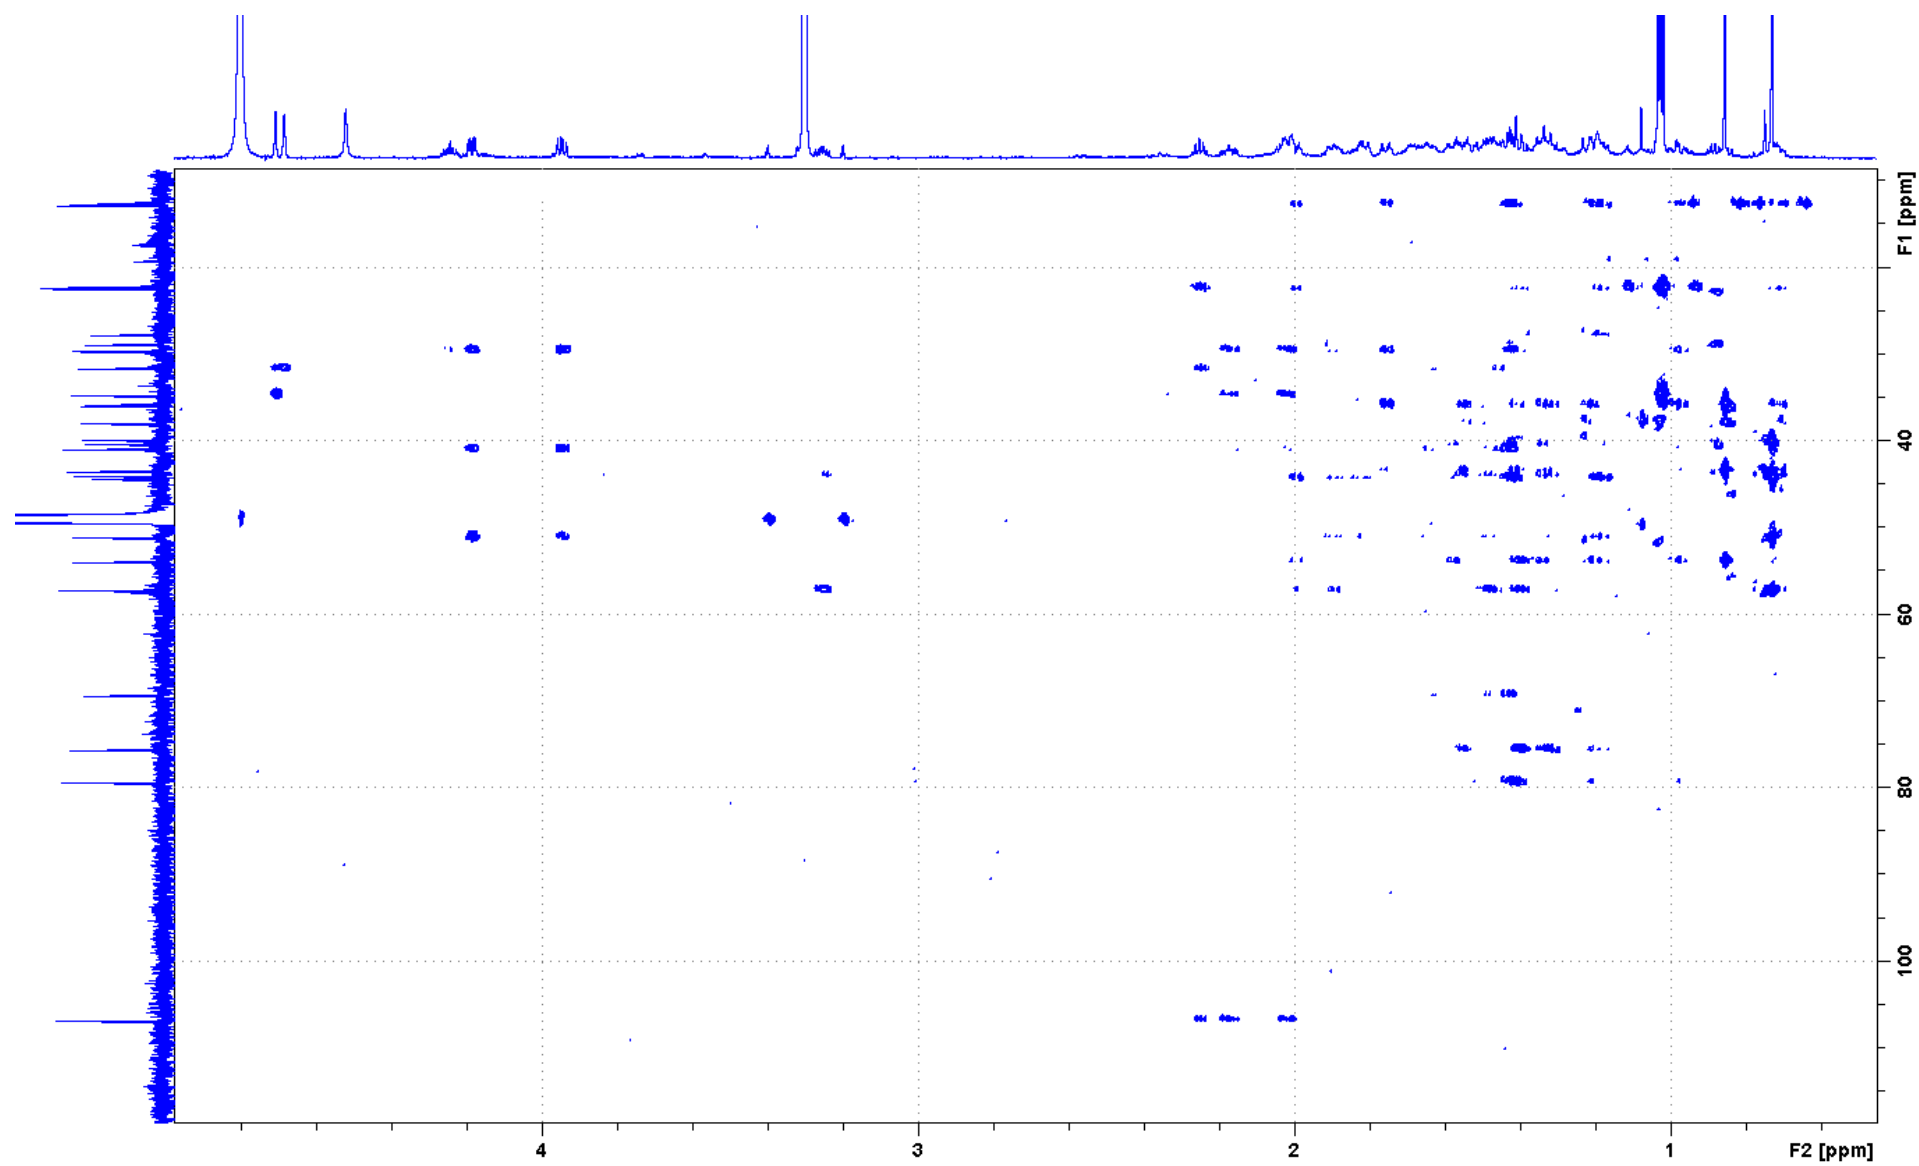

**Figure S36.** ROESY (700.13 MHz, CD<sub>3</sub>OD) spectrum of compound **4**

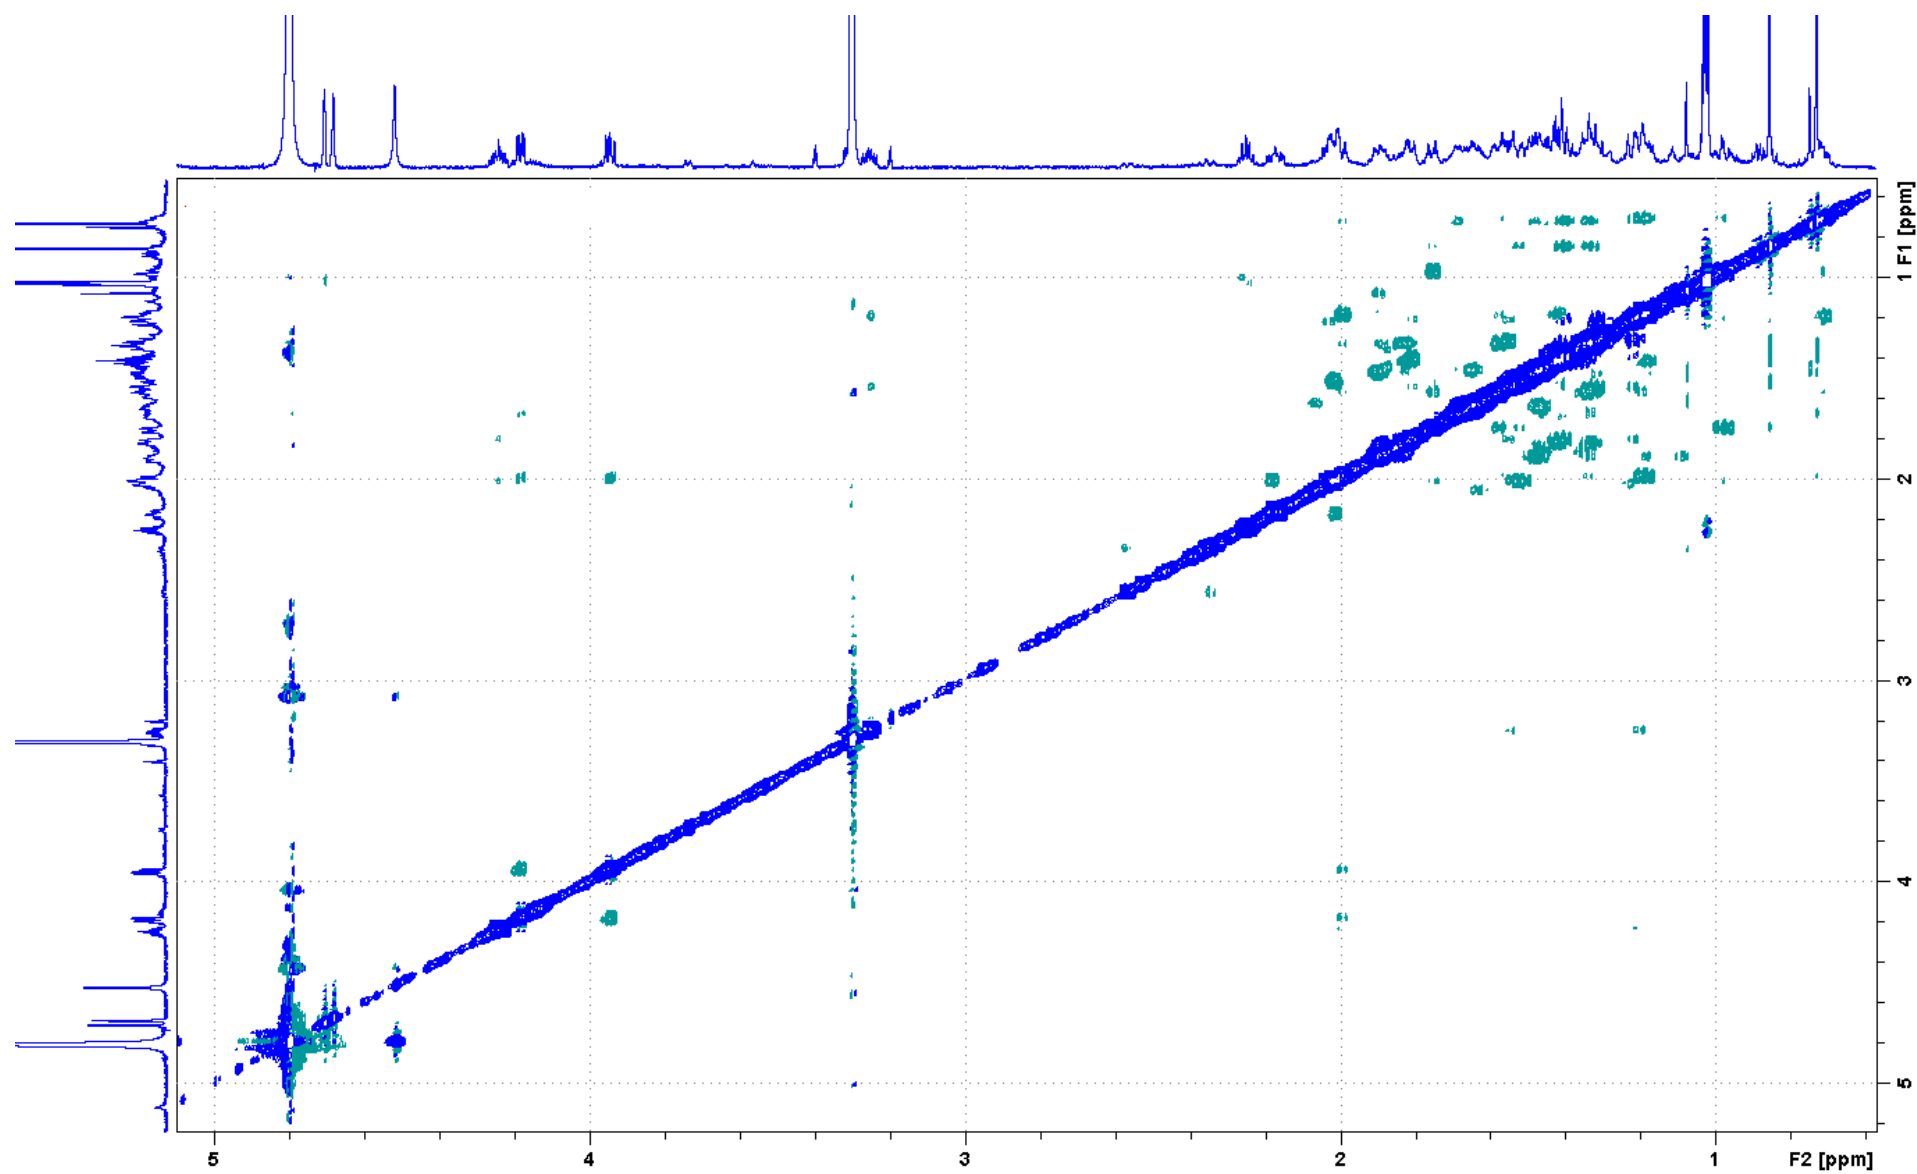

**Figure S37.** HRESIMS spectra of compound **5****(-)HRESIMS**  $[M - Na]^-$  ion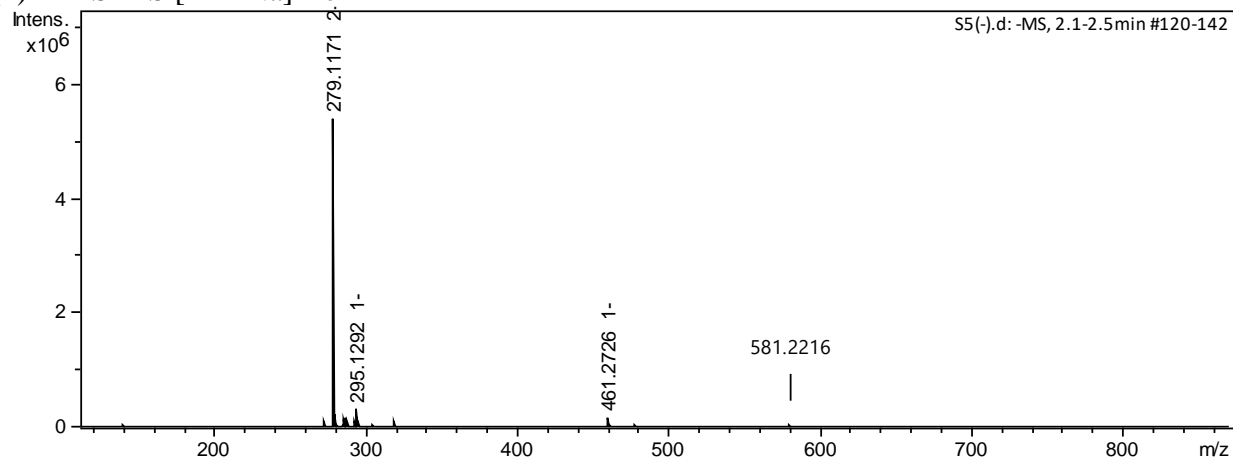**(+)HRESIMS**  $[M + Na]^+$  ion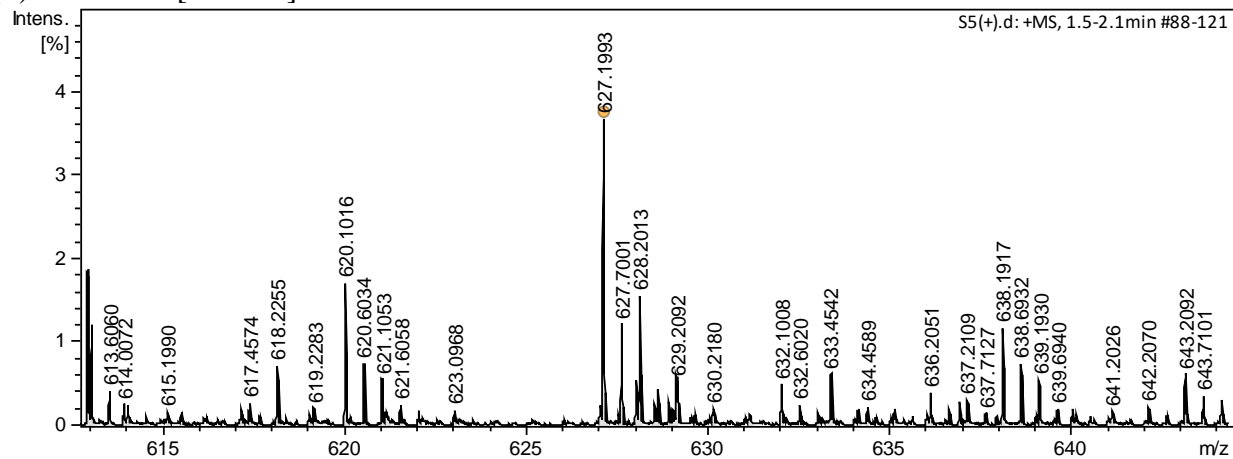



**Figure S38.**  $^1\text{H}$  NMR (700.13 MHz,  $\text{CD}_3\text{OD}$ ) spectrum of compound **5**

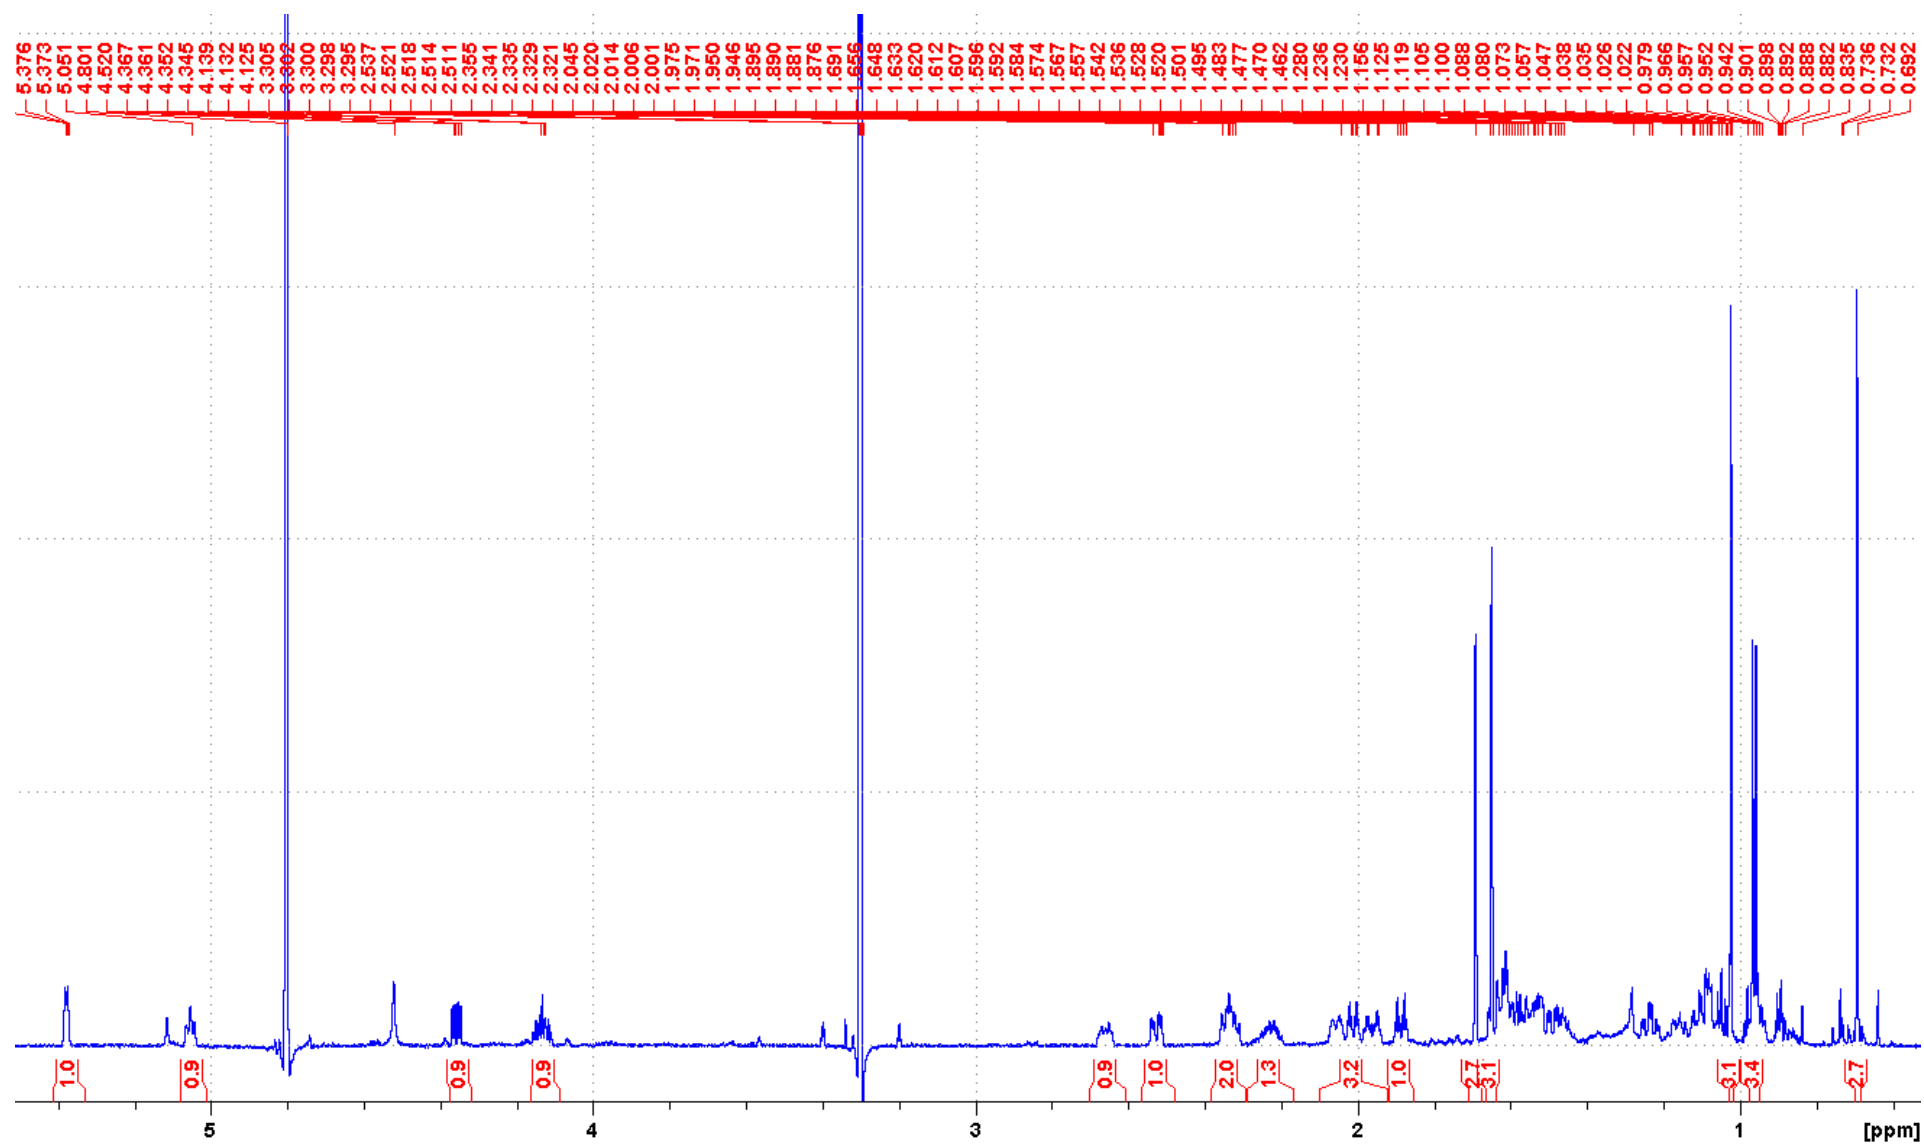

**Figure S39.**  $^{13}\text{C}$  NMR (176.04 MHz,  $\text{CD}_3\text{OD}$ ) spectrum of compound **5**

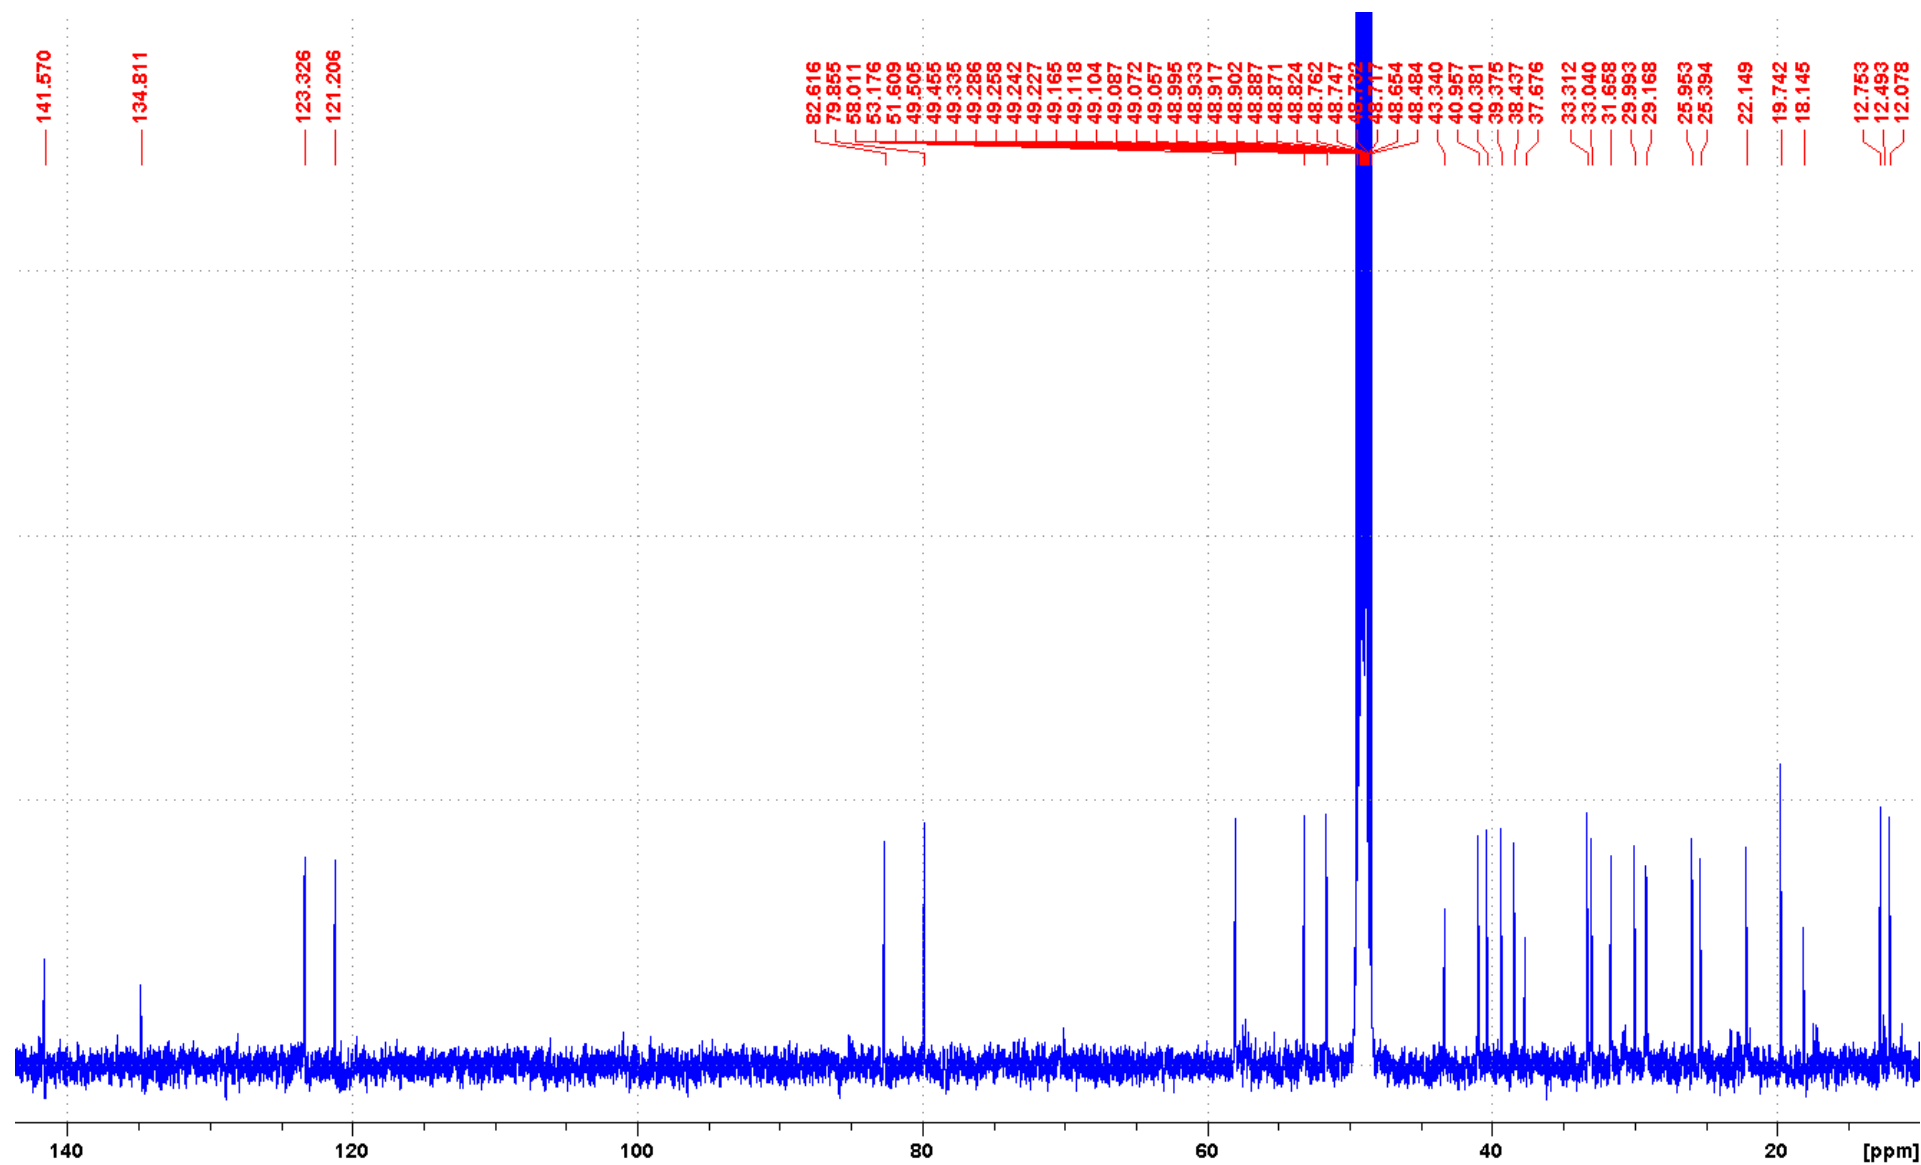

**Figure S40.** COSY (700.13 MHz, CD<sub>3</sub>OD) spectrum of compound **5**

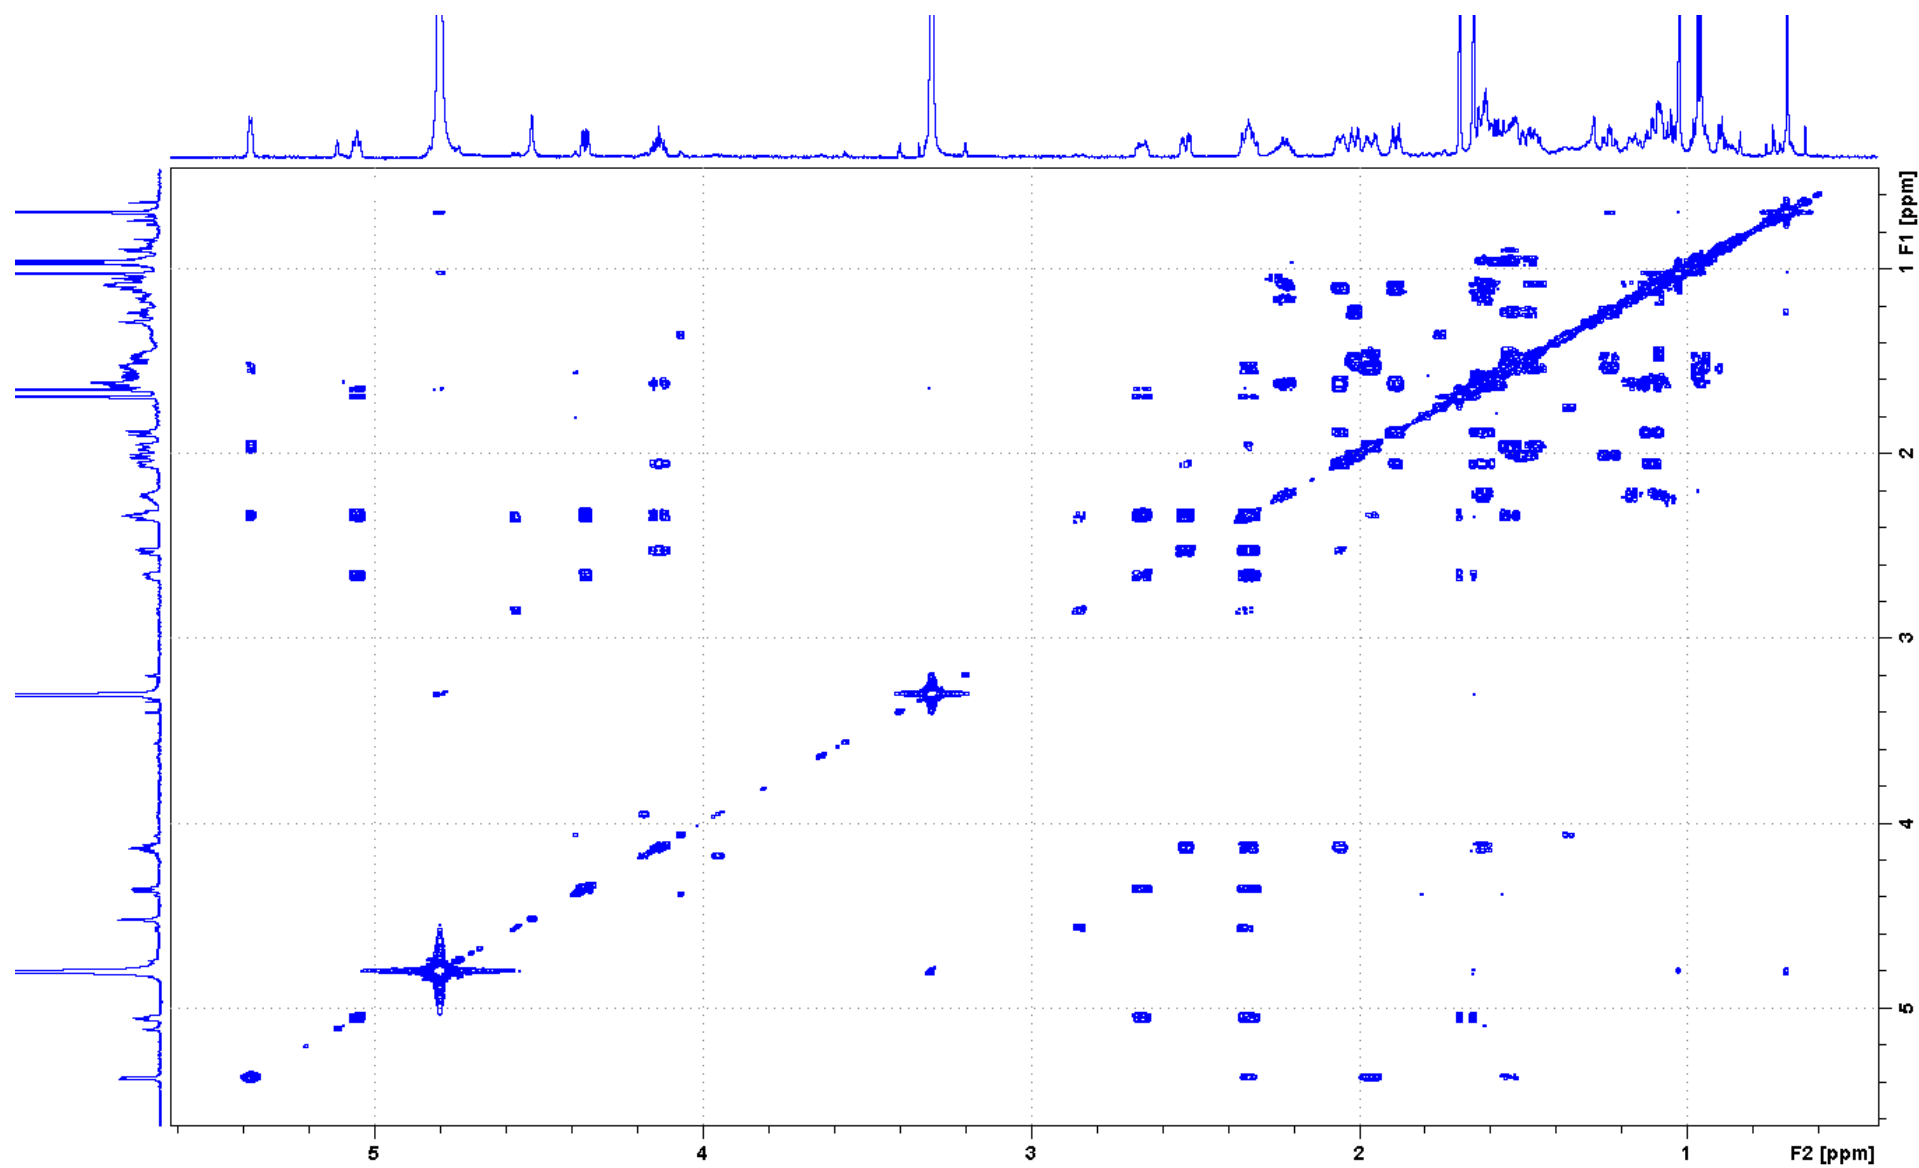

**Figure S41.** HSQC (700.13 MHz, CD<sub>3</sub>OD) spectrum of compound **5**

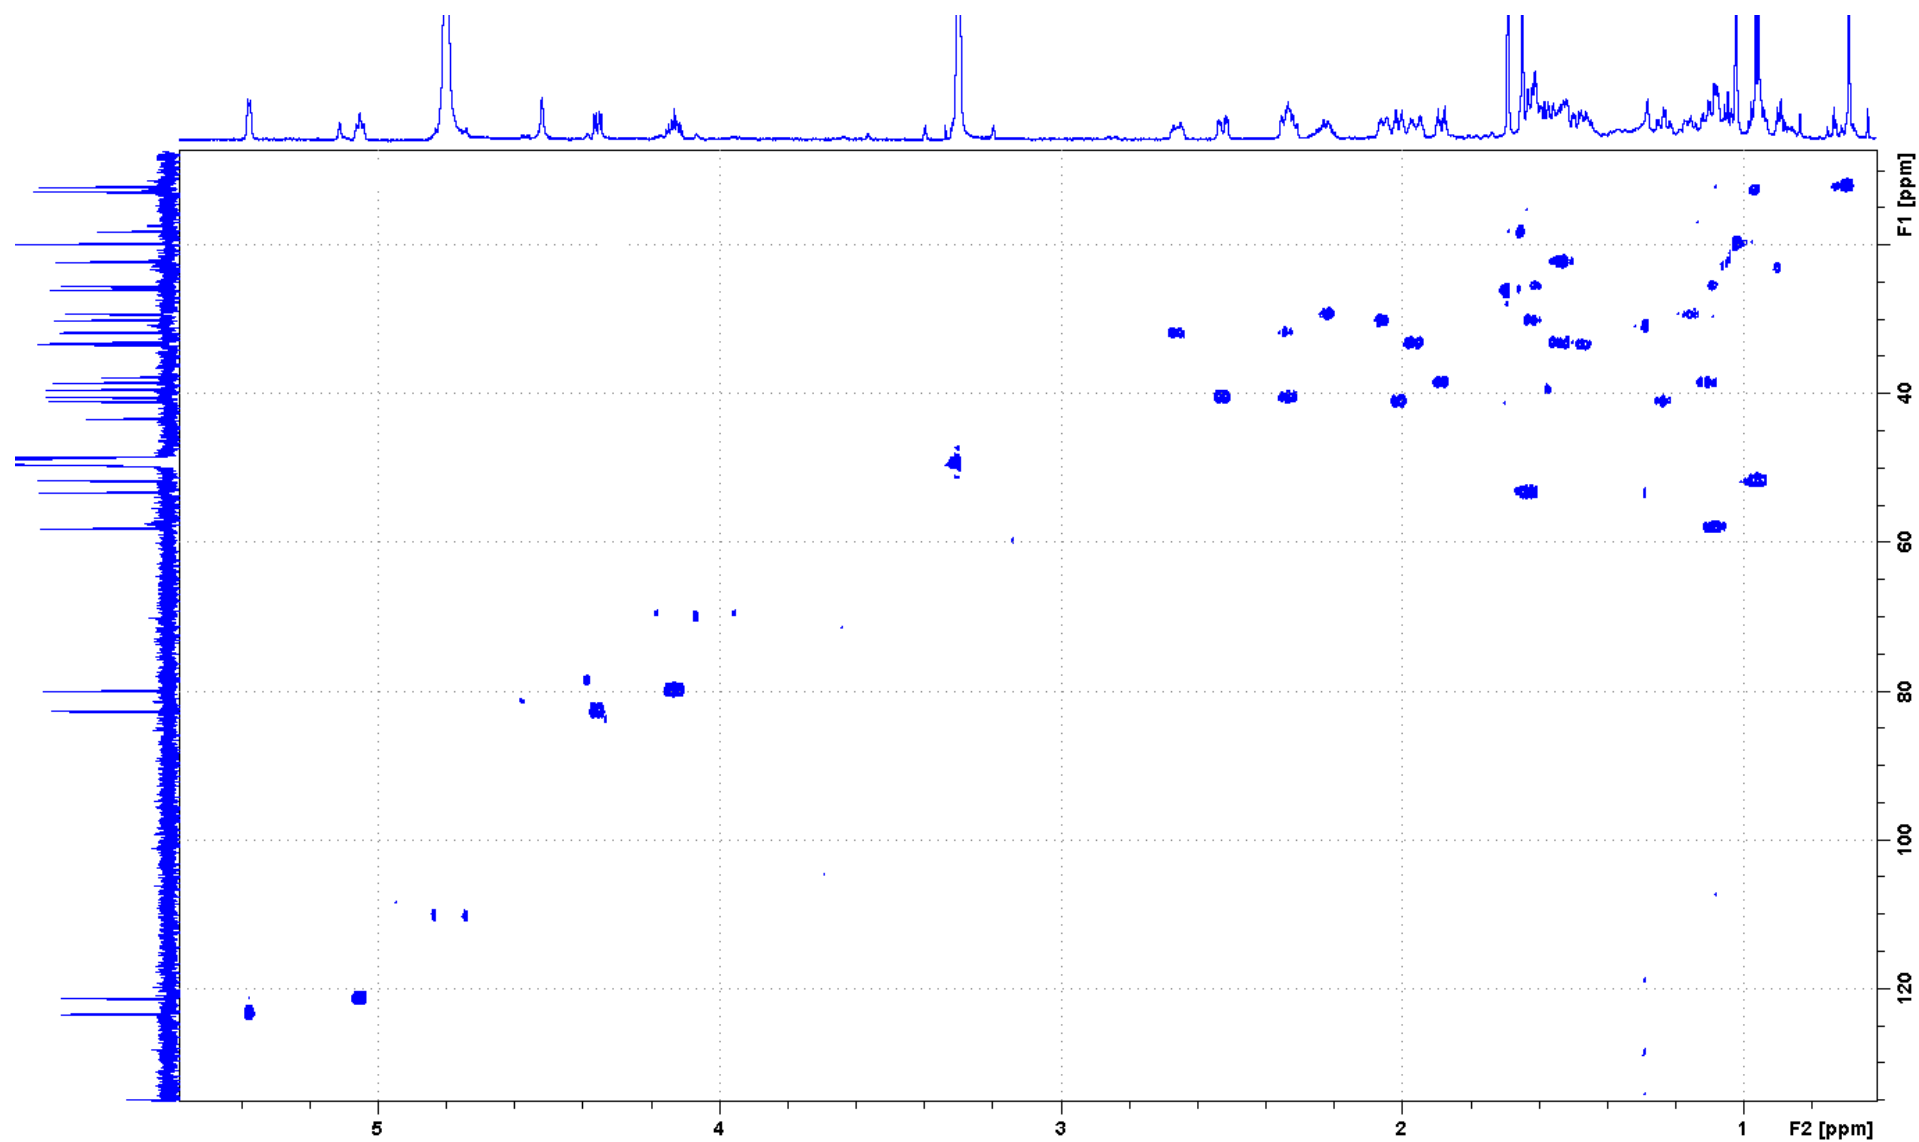

**Figure S42.** HMBC (700.13 MHz, CD<sub>3</sub>OD) spectrum of compound **5**

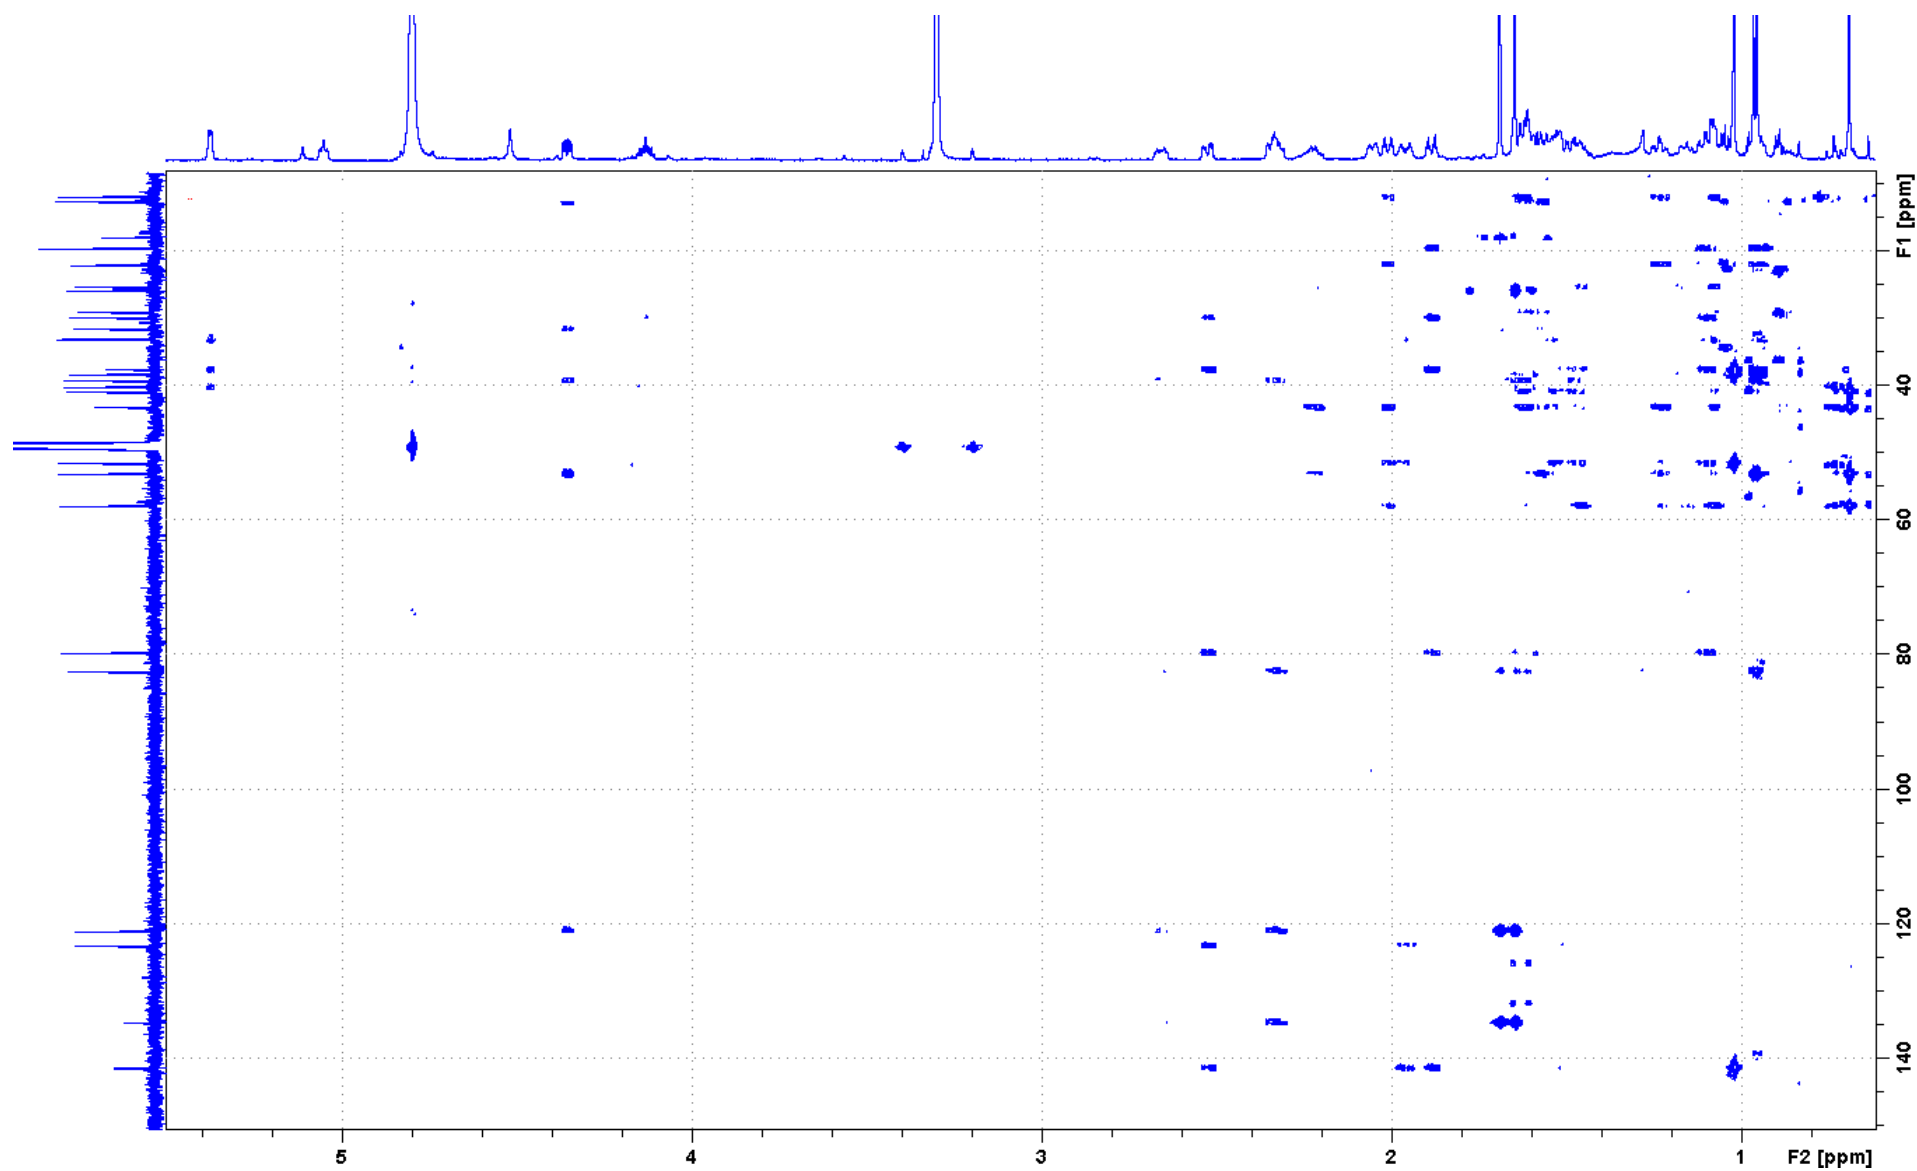

**Figure S43.** ROESY (700.13 MHz, CD<sub>3</sub>OD) spectrum of compound **5**

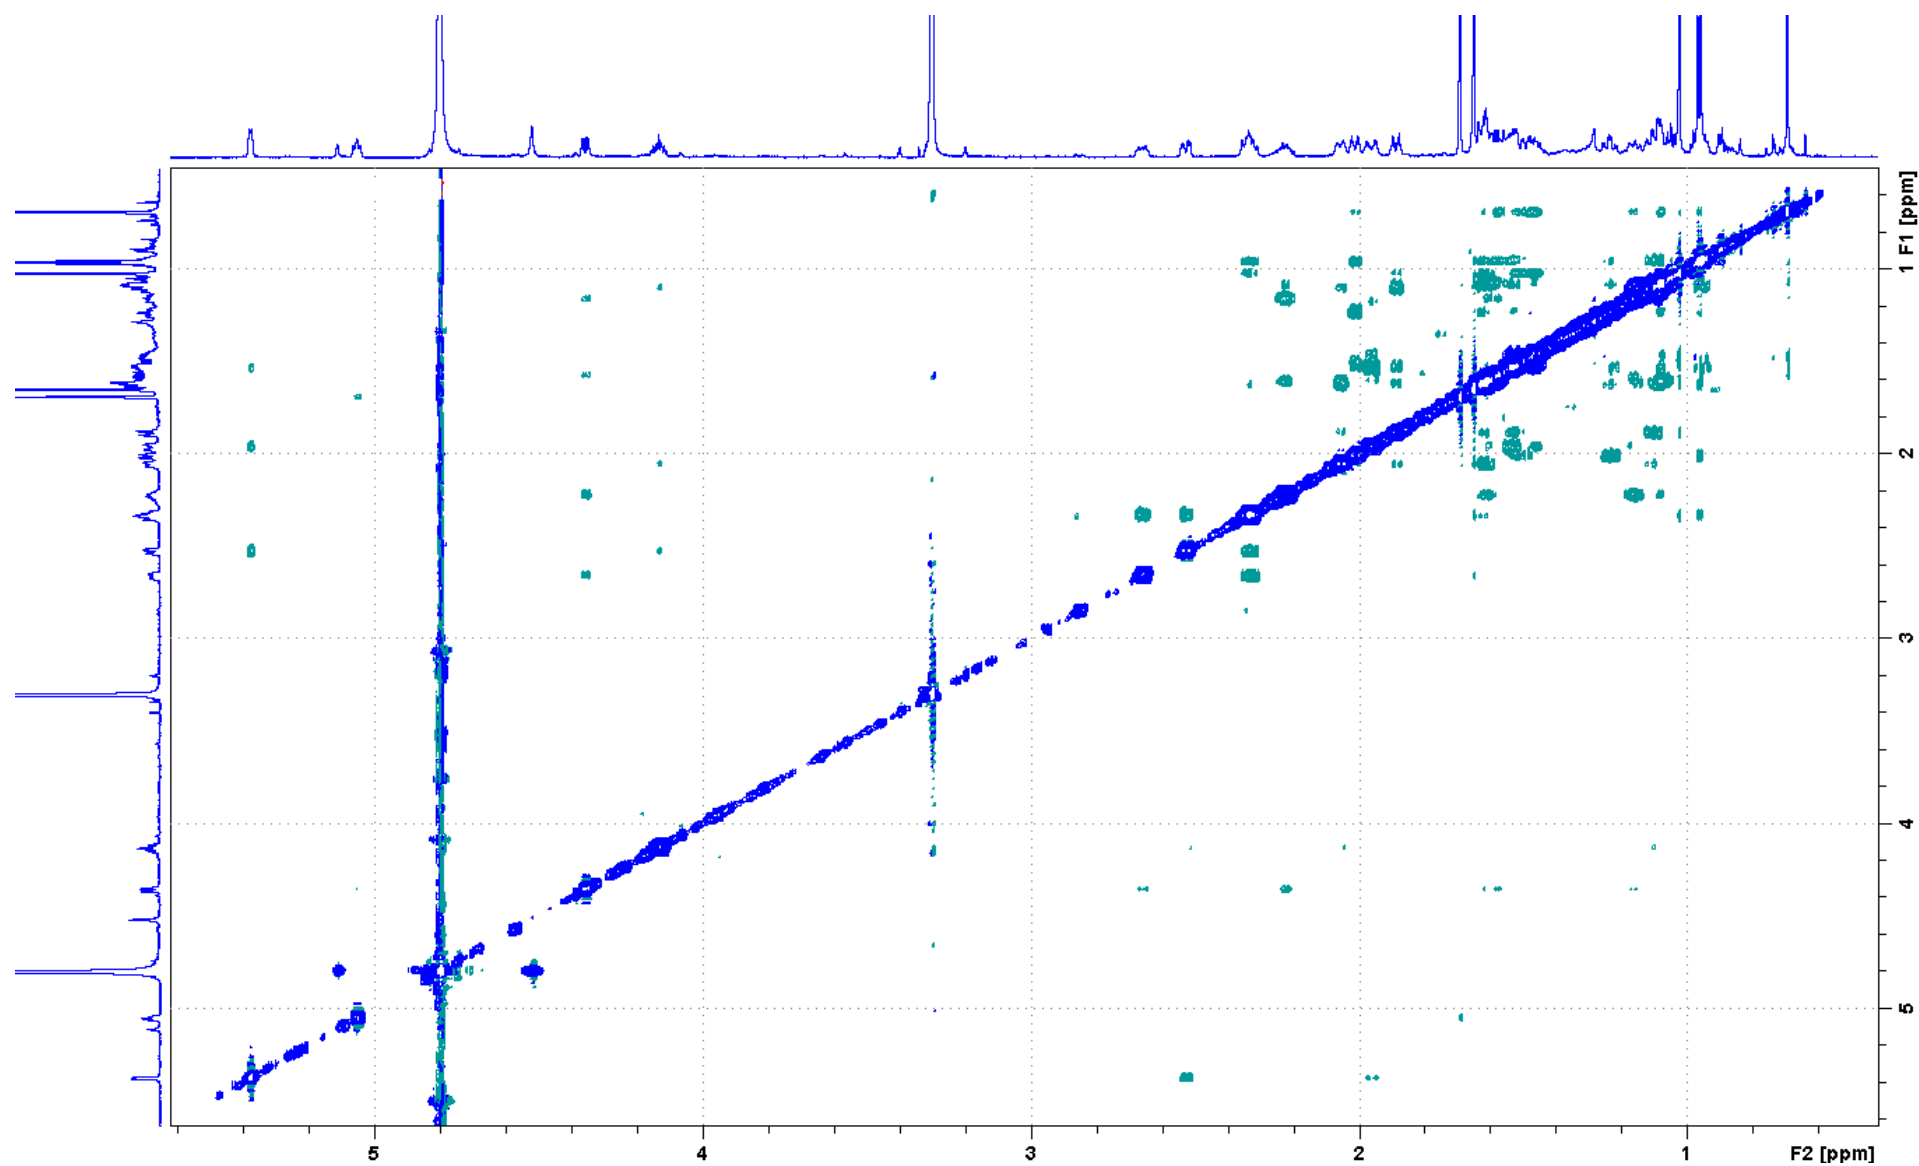

Supplement: s1 [file s1]
